# 1 Preprinting the COVID-19 pandemic

2

3 Nicholas Fraser<sup>1,#</sup>, Liam Brierley<sup>2,#</sup>, Gautam Dey<sup>3,4</sup>, Jessica K Polka<sup>5</sup>, Máté Pálffy<sup>6</sup>, Federico Nanni<sup>7</sup> &  
4 Jonathon Alexis Coates<sup>8,9,\*</sup>

5

6

7 <sup>1</sup> Leibniz Information Centre for Economics, Düsternbrooker Weg 120, 24105 Kiel, Germany

8 <sup>2</sup> Department of Health Data Science, University of Liverpool, Brownlow Street, Liverpool, L69 3GL,

9 UK

10 <sup>3</sup> MRC Lab for Molecular Cell Biology, UCL, Gower Street, London WC1E 6BT, UK

11 <sup>4</sup> Cell Biology and Biophysics Unit, European Molecular Biology Laboratory, Meyerhofstr. 1, 69117

12 Heidelberg, Germany

13 <sup>5</sup> ASAPbio, 3739 Balboa St # 1038, San Francisco, CA 94121, USA

14 <sup>6</sup> The Company of Biologists, Bidder Building, Station Road, Histon, Cambridge CB24 9LF, UK

15 <sup>7</sup> The Alan Turing Institute, 96 Euston Rd, London NW1 2DB, UK

16 <sup>8</sup> Hughes Hall College, University of Cambridge, Wollaston Rd, Cambridge, CB1 2EW, UK

17 <sup>9</sup> William Harvey Research Institute, Charterhouse Square Barts and the London School of Medicine

18 and Dentistry Queen Mary University of London, London, EC1M 6BQ, UK

19

20 # These authors contributed equally to this work

21 \* Correspondence: [jonathon.coates@qmul.ac.uk](mailto:jonathon.coates@qmul.ac.uk)

22

## 23 Abstract

24 The world continues to face a life-threatening viral pandemic. The virus underlying the COVID-19  
25 disease, SARS-CoV-2, has caused over 98 million confirmed cases and 2.2 million deaths since  
26 January 2020. Although the most recent respiratory viral pandemic swept the globe only a decade  
27 ago, the way science operates and responds to current events has experienced a paradigm shift in  
28 the interim. The scientific community has responded rapidly to the COVID-19 pandemic, releasing  
29 over 125,000 COVID-19 related scientific articles within 10 months of the first confirmed case, of  
30 which more than 30,000 were hosted by preprint servers. We focused our analysis on bioRxiv and  
31 medRxiv, two growing preprint servers for biomedical research, investigating the attributes of  
32 COVID-19 preprints, their access and usage rates, as well as characteristics of their propagation on  
33 online platforms. Our data provides evidence for increased scientific and public engagement with  
34 preprints related to COVID-19 (COVID-19 preprints are accessed more, cited more, and shared more  
35 on various online platforms than non-COVID-19 preprints), as well as changes in the use of preprints  
36 by journalists and policymakers. We also find evidence for changes in preprinting and publishing  
37 behaviour: COVID-19 preprints are shorter and reviewed faster. Our results highlight the  
38 unprecedented role of preprints and preprint servers in the dissemination of COVID-19 science, and  
39 the impact of the pandemic on the scientific communication landscape.

40

## 41 Introduction

42 Since January 2020, the world has been gripped by the COVID-19 outbreak, which has escalated to  
43 pandemic status, and caused over 98 million cases and 2.1 million deaths (43 million cases and 1.1  
44 million deaths within 10 months of the first reported case) [1–3]. The causative pathogen was  
45 rapidly identified as a novel virus within the family *Coronaviridae* and was named severe acute  
46 respiratory syndrome coronavirus 2 (SARS-CoV-2) [4]. Although multiple coronaviruses are  
47 ubiquitous among humans and cause only mild disease, epidemics of newly emerging coronaviruses  
48 were previously observed in SARS in 2002 [5] and Middle East respiratory syndrome (MERS) in 2012  
49 [6]. The unprecedented extent and rate of spread of COVID-19 has created a critical global health  
50 emergency and academic communities have raced to respond through research developments.

51 New scholarly research has traditionally been communicated via published journal articles or  
52 conference presentations. The traditional journal publishing process involves the submission of  
53 manuscripts by authors to an individual journal, which then organises peer review, the process in  
54 which other scientists (“peers”) are invited to scrutinise the manuscript and determine its suitability  
55 for publication. Authors often conduct additional experiments or analyses to address the reviewers’  
56 concerns in one or more revisions. Even after this lengthy process is concluded, almost half of  
57 submissions are rejected and require re-submission to a different journal [11]. The entire publishing  
58 timeline from submission to acceptance is estimated to take approximately 6 months in the life  
59 sciences [10,12]; the median time between the date a preprint is posted and the date on which the  
60 first DOI of a journal article is registered is 166 days in the life sciences [10].

61 Preprints are publicly-accessible scholarly manuscripts that have not yet been certified by peer  
62 review, and have been used in some disciplines, such as physics, for communicating scientific result  
63 for over 30 years [7]. In 2013 two new preprint initiatives for the biological sciences launched: PeerJ  
64 Preprints, from the publisher PeerJ, and bioRxiv, from Cold Spring Harbor Laboratory (CSHL). The  
65 latter established partnerships with journals that enabled simultaneous preprint posting at the time  
66 of submission [8]. More recently, CSHL, in collaboration with Yale and BMJ, launched medRxiv, a  
67 preprint server for the medical sciences [9]. Preprint platforms serving the life sciences have  
68 subsequently flourished and preprints submissions continue to grow year-on-year; two-thirds of  
69 these preprints are eventually published in peer-reviewed journals [10].

70 While funders and institutions explicitly encouraged pre-publication data sharing in the context of  
71 the recent Zika and Ebola virus disease outbreaks [13], usage of preprints remained modest through  
72 these epidemics [14]. The COVID-19 crisis represents the first time that preprints have been widely  
73 used outside of specific communities to communicate during an epidemic.

74 We assessed the role of preprints in the communication of COVID-19 research in the first 10 months  
75 of the pandemic, between January 1<sup>st</sup> and October 31<sup>st</sup> 2020. We found that preprint servers hosted  
76 almost 25% of COVID-19 related science; that these COVID-19 preprints were being accessed and  
77 downloaded in far greater volume than other preprints on the same servers; and that these were  
78 widely shared across multiple online platforms. Moreover, we determined that COVID-19 preprints  
79 are shorter and are published in journals with a shorter delay following posting than their non-  
80 COVID-19 counterparts. Taken together, our data demonstrates the importance of rapidly and  
81 openly sharing science in the context of a global pandemic and the essential role of preprints in this  
82 endeavour.

83

## 84 Results

85 COVID-19 preprints were posted early in the pandemic and represent a significant  
86 proportion of the COVID-19 literature

87 The COVID-19 pandemic has rapidly spread across the globe, from 3 patients in the city of Wuhan on  
88 the 27<sup>th</sup> December 2019 to over 46.1 million confirmed cases worldwide by the end of October 2020  
89 (Fig. 1A). The scientific community responded rapidly as soon as COVID-19 emerged as a serious  
90 threat, with publications appearing within weeks of the first reported cases (Fig. 1B). By the end of  
91 April 2020, over 19,000 scientific publications had appeared, published both in scientific journals  
92 (12,679; ~65%) and on preprint servers (6,710; ~35%) (Fig. 1B) – in some cases preprints had already  
93 been published in journals during this time period and thus contribute to the counts of both sources.  
94 Over the following months the total number of COVID-19 related publications increased  
95 approximately linearly, although the proportion of these which were preprints fell: by the end of  
96 October over 125,000 publications on COVID-19 had appeared (30,260 preprints; ~25%). In  
97 comparison to other recent outbreaks of global significance caused by emerging RNA viruses, the  
98 preprint response to COVID-19 has been much larger; 10,232 COVID-19 related preprints were  
99 posted to bioRxiv and medRxiv in the first 10 months of the pandemic; in comparison, only 78 Zika  
100 virus-related, and 10 Ebola virus-related preprints were posted to bioRxiv during the entire duration  
101 of the respective Zika virus epidemic (2015-2016) and Western African Ebola virus epidemic (2014-  
102 2016) (Supplemental Fig. 1A). This surge in COVID-19 preprints is not explained by general increases  
103 in preprint server usage; considering counts of outbreak-related and non-outbreak-related preprints  
104 for each outbreak (COVID-19, Ebola or Zika virus), preprint type was significantly associated with  
105 outbreak (Chi-square;  $\chi^2 = 2559.2$ ,  $p < 0.001$ ), with the proportion of outbreak-related preprints  
106 being greatest for COVID-19.

107 The 30,260 manuscripts posted as preprints were hosted on a range of preprint servers covering  
108 diverse subject areas not limited to biomedical research (Fig. 1C, data from [15]). It is important to  
109 note that this number includes preprints that may have been posted on multiple preprint servers  
110 simultaneously; however, by considering only preprints with unique titles (case-insensitive) it  
111 appears that this only applies to a small proportion of preprint records (<5%). The total number is  
112 preprints is nevertheless likely an underestimation of the true volume of preprints posted, as a  
113 number of preprint servers and other repositories (e.g. institutional repositories) that could be  
114 expected to host COVID-19 research are not included [15]. Despite being one of the newest preprint  
115 servers, medRxiv hosted the largest number of preprints (7,882); the next largest were SSRN (4180),  
116 Research Square (4089), RePEc (2774), arXiv (2592), bioRxiv (2328), JMIR (1218) and Preprints.org  
117 (1020); all other preprint servers were found to host <1,000 preprints (Fig. 1C).

118 One of the most-frequently cited benefits of preprints is that they allow free access to research  
119 findings [16], whilst a large proportion of journal articles often remain behind subscription paywalls.  
120 In response to the pandemic, a number of journal publishers began to alter their open-access  
121 policies in relation to COVID-19 manuscripts. One such change was to make COVID-19 literature  
122 temporarily open access (at least for the duration of the pandemic), with over 80,000 papers in our  
123 dataset being open access (Supplemental Fig. 1B).

#### 124 **Attributes of COVID-19 preprints posted between January and October 2020**

125 To explore the attributes of COVID-19 preprints in greater detail, we focused our following  
126 investigation on two of the most popular preprint servers in the biomedical sciences: bioRxiv and  
127 medRxiv. We compared attributes of COVID-19 related preprints posted within our analysis period  
128 between 1<sup>st</sup> January 2020 and 31<sup>st</sup> October against non-COVID-19 related preprints posted in the  
129 same time frame. In total, 44,503 preprints were deposited to bioRxiv and medRxiv in this period, of  
130 which the majority (34,271, 77.0%) were non-COVID-19 related preprints (Fig. 2A, Supplemental  
131 Table 1). During the early phase of the pandemic, the posted monthly volumes of non-COVID-19  
132 preprints was relatively constant, while the monthly volume of COVID-19 preprints increased,  
133 peaking at 1,967 in May, and subsequently decreased month-by-month. These patterns persisted  
134 when the two preprint servers were considered independently (Supplemental Fig. 2A). Moreover,  
135 COVID-19 preprints have represented the majority of preprints posted to medRxiv each month after  
136 February 2020.

137 The increase in the rate of preprint posting poses challenges for their timely screening. A minor but  
138 detectable difference was observed between screening time for COVID-19 and non-COVID-19

139 preprints (Fig. 2B), though this difference appeared to vary with server (two-way ANOVA, interaction  
140 term;  $F_{1,83333} = 19.22$ ,  $p < 0.001$ ). Specifically, screening was marginally slower for COVID-19 preprints  
141 than for non-COVID-19 preprints deposited to medRxiv (mean difference = 0.16 days; Tukey HSD,  $p <$   
142  $0.001$ ), but not to bioRxiv ( $p = 0.981$ ). This slower screening for COVID-19 preprints was a result of  
143 more of these preprints being hosted on medRxiv, which had slightly longer screening times overall;  
144 bioRxiv screened preprints approximately 2 days quicker than medRxiv independent of COVID-status  
145 (both  $p < 0.001$ , Supplemental Fig. 2B, Supplemental Table 1).

146 Preprint servers offer authors the opportunity to post updated versions of a preprint, enabling them  
147 to incorporate feedback, correct mistakes or add additional data and analysis. The majority of  
148 preprints existed as only a single version for both COVID-19 and non-COVID-19 works, with very few  
149 preprints existing in more than two versions (Fig. 2C). This may somewhat reflect the relatively short  
150 timespan of our analysis period. Although distributions were similar, COVID-19 preprints appeared  
151 to have a slightly greater number of versions, 1 [IQR 1] vs 1 [IQR 0]; Mann-Whitney,  $p < 0.001$ ). The  
152 choice of preprint server did not appear to impact on the number of versions (Supplemental Fig. 2C,  
153 Supplemental Table 1).

154 bioRxiv and medRxiv allow authors to select from a number of different Creative Commons  
155 (<https://creativecommons.org/>) license types when depositing their work: CC0 (No Rights Reserved),  
156 CC-BY (Attribution), CC BY-NC (Attribution, Non-Commercial), CC-BY-ND (Attribution, No-  
157 Derivatives), CC-BY-NC-ND (Attribution, Non-Commercial, No-Derivatives). Authors may also select  
158 to post their work without a license (i.e., All Rights Reserved) that allows text and data mining. A  
159 previous analysis has found that bioRxiv authors tend to post preprints under the more restrictive  
160 license types [17], although there appears to be some confusion amongst authors as to the precise  
161 implications of each license type [18]. License choice was significantly associated with preprint  
162 category (Chi-square,  $\chi^2 = 336.0$ ,  $df = 5$ ,  $p < 0.001$ ); authors of COVID-19 preprints were more likely  
163 to choose the more restrictive CC-BY-NC-ND or CC-BY-ND than those of non-COVID-19 preprints, and  
164 less likely to choose CC-BY (Fig. 2D). Again, the choice of preprint server did not appear to impact on  
165 the type of license selected by the authors (Supplemental Fig. 2D).

166 Given the novelty of the COVID-19 research field and rapid speed at which preprints are being  
167 posted, we hypothesised that researchers may be posting preprints in a less mature state, or based  
168 on a smaller literature base than for non-COVID preprints. To investigate this, we compared the  
169 word counts and reference counts of COVID-19 preprints and non-COVID-19 preprints from bioRxiv  
170 (at the time of data extraction, HTML full-texts from which word and reference counts were derived  
171 were not available for medRxiv) (Fig. 2E). We found that COVID-19 preprints are on average 32%

172 shorter in length than non-COVID-19 preprints (median, 3965 [IQR 2433] vs 5427 [IQR 2790]; Mann-  
173 Whitney,  $p < 0.001$ ) (Supplemental Table 1). Although the length of preprints gradually increased  
174 over the analysis period, COVID-19 preprints remained shorter than non-COVID-19 preprints with a  
175 similar difference in word count, even when adjusted for factors such as authorship team size and  
176 bioRxiv subject categorisation (Supplemental Model, Supplemental Table 2 & 3). COVID-19 preprints  
177 also contain fewer references than non-COVID-19 preprints (Fig. 2F), though not fewer than  
178 expected relative to overall preprint length, as little difference was detected in reference:word  
179 count ratios (median, 1:103 vs 1:101;  $p = 0.052$ ). As word counts increased over time, the reference  
180 counts per preprint also steadily increased.

### 181 Scientists turned to preprints for the first time to share COVID-19 science

182 The number of authors per preprint may give an additional indication as to the amount of work,  
183 resources used, and the extent of collaboration in a manuscript. Though little difference was seen in  
184 number of authors between preprint servers (Supplemental Table 1), COVID-19 preprints had a  
185 marginally higher number of authors than non-COVID-19 preprints on average (median, 7 [IQR 8] vs  
186 6 [IQR 5];  $p < 0.001$ ), due to the greater likelihood of large (11+) authorship team sizes (Fig. 3A).  
187 However, single-author preprints were ~2.6 times more common for COVID-19 (6.1% of preprints)  
188 than non-COVID-19 preprints (2.3% of preprints) (Fig. 3A).

189 The largest proportion of preprints in our dataset were from corresponding authors in the US,  
190 followed by significant proportions from the UK and China (Fig. 3B). It is notable that China is over-  
191 represented in terms of COVID-19 preprints compared to its non-COVID-19 preprint output: 39% of  
192 preprints from Chinese corresponding authors were COVID-19 related, compared to 16.5% of the US  
193 output and 20.1% of the UK output. We also found a significant association for corresponding  
194 authors between preprint type (COVID-19 or non-COVID-19) and whether this was the author's first  
195 bioRxiv or medRxiv preprint (Chi-square,  $\chi^2 = 840.4$ ,  $df = 1$ ,  $p < 0.001$ ). Among COVID-19  
196 corresponding authors, 85% were posting a preprint for the first time, compared to 69% of non-  
197 COVID-19 corresponding authors in the same period. To further understand which authors have  
198 been drawn to begin using preprints since the pandemic began, we stratified these groups by  
199 country (Supplemental Table 4) and found significant associations for the USA, UK, Germany, India  
200 (Bonferroni adjusted  $p < 0.001$ ), France, Canada, Italy ( $p < 0.01$ ), and China ( $p < 0.05$ ). In all cases, a  
201 higher proportion were posting a preprint for the first time among COVID-19 corresponding authors  
202 than non-COVID-19 corresponding authors. Moreover, we found that most countries posted their  
203 first COVID-19 preprint close to the time of their first confirmed COVID-19 case (Fig. 3D), with weak  
204 positive correlation considering calendar days of both events (Spearman's rank;  $p = 0.54$ ,  $p < 0.001$ ).



205 Countries posting a COVID-19 preprint in advance of their first confirmed case were mostly higher-  
206 income countries (e.g., USA, UK, New Zealand, Switzerland). COVID-19 preprints were deposited  
207 from over 100 countries, highlighting the global response to the pandemic.

208 There has been much discussion regarding the appropriateness of researchers switching to COVID-  
209 19 research from other fields [19]. To quantify whether this phenomenon was detectable within the  
210 preprint literature, we compared the bioRxiv or medRxiv category of each COVID-19 preprint to the  
211 most recent previous non-COVID-19 preprint (if any) from the same corresponding author. Most  
212 corresponding authors were not drastically changing fields, with category differences generally  
213 spanning reasonably related areas. For example, some authors that previously posted preprints in  
214 evolutionary biology have posted COVID-19 preprints in microbiology (Fig. 3E). This suggests that –  
215 at least within the life sciences – principal investigators are utilising their labs’ skills and resources in  
216 an expected manner in their contributions to COVID-19 research.

#### 217 COVID-19 preprints were published quicker than non-COVID-19 preprints

218 Critics have previously raised concerns that by forgoing the traditional peer-review process, preprint  
219 servers could be flooded by poor-quality research. Nonetheless, earlier analyses have shown that a  
220 large proportion of preprints (~70%) in the biomedical sciences are eventually published in peer-  
221 reviewed scientific journals [10]. We assessed differences in publication outcomes for COVID-19  
222 versus non-COVID-19 preprints during our analysis period, which may be partially related to  
223 differences in preprint quality. Published status (published/unpublished) was significantly associated  
224 with preprint type (Chi-square;  $\chi^2 = 186.2$ ,  $df = 1$ ,  $p < 0.001$ ); within our timeframe, 21.1% of COVID-  
225 19 preprints were published in total by the end of October, compared to 15.4% of non-COVID  
226 preprints. As expected, greater proportions published were seen among preprints posted earlier,  
227 with over 40% of COVID-19 preprints submitted in January published by the end of October, and less  
228 than 10% for those published in August or later (Fig 4A). Published COVID-19 preprints were  
229 distributed across many journals, with clinical or multidisciplinary journals tending to publish the  
230 most COVID-19 preprints (Fig. 4B). To determine how publishers were prioritising COVID-19  
231 research, we compared the time from preprint posting to publication in a journal. The time interval  
232 from posting to subsequent publication was significantly reduced for COVID-19 preprints by a  
233 difference in medians of 48 days compared to non-COVID-19 preprints posted in the same time  
234 period (68 days [IQR 69] vs 116 days [IQR 90]; Mann-Whitney,  $p < 0.001$ ). This did not appear to be  
235 driven by any temporal changes in publishing practices, as the distribution of publication times for  
236 non-COVID-19 preprints was similar to our control timeframe of January - December 2019 (Fig. 4C).  
237 This acceleration additionally varied between publishers (two-way ANOVA, interaction term preprint



238 type\*publisher;  $F_{9,5273} = 6.58$ ,  $p < 0.001$ ), and was greatest for the American Association for the  
239 Advancement of Science (AAAS) at an average difference of 102 days (Tukey HSD;  $p < 0.001$ ) (Fig.  
240 4D).

#### 241 Extensive access of preprint servers for COVID-19 research

242 At the start of our time window, COVID-19 preprints received abstract views at a rate over 18 times  
243 that of non-COVID-19 preprints (Fig. 5A) (time-adjusted negative binomial regression; rate ratio =  
244 18.2,  $z = 125.0$ ,  $p < 0.001$ ) and downloads at a rate of almost 30 times (Fig. 5B) (rate ratio = 27.1,  $z =$   
245 124.2,  $p < 0.001$ ). Preprints posted later displayed lower usage rates, in part due to the reduced  
246 length of time they were online and able to accrue views and downloads. However, the decrease  
247 over time was stronger for COVID-19 preprints versus non-COVID-19 preprints in both views and  
248 downloads (preprint type\*calendar day interaction terms, both  $p < 0.001$ ); each additional calendar  
249 month in posting date resulted in an estimated 24.3%/7.4% reduction in rate of views and an  
250 estimated 28.5%/12.0% reduction in rate of downloads for COVID-19/non-COVID-19 preprints,  
251 respectively. This suggests that most non-COVID-19 preprints receive their heaviest usage soon after  
252 appearing online, but COVID-19 preprints continue to accumulate usage well beyond their first  
253 appearance, the highest rates of usage being observed for those preprints posted in January (Fig. 5).

254 To confirm that usage of COVID-19 and non-COVID-19 preprints was not an artefact of differing  
255 preprint server reliance during the pandemic, we compared usage rates during the pandemic period  
256 those from the previous year (January - December 2019), as a non-pandemic control period. Beyond  
257 the expected effect of fewer views/downloads of preprints that have been uploaded for a shorter  
258 time, the usage data did not differ from that prior to the pandemic (Supplemental Fig. 3).

259 Secondly, we investigated usage across additional preprint servers (data kindly provided by each of  
260 the server operators). We found that COVID-19 preprints were consistently downloaded more than  
261 non-COVID-19 preprints during our timeframe, regardless of which preprint server hosted the  
262 manuscript (Supplemental Fig. 3C), though the gap in downloads varied between server (two-way  
263 ANOVA, interaction term;  $F_{3,89990} = 126.6$ ,  $p < 0.001$ ). Server usage differences were more  
264 pronounced for COVID-19 preprints; multiple post-hoc comparisons confirmed that bioRxiv and  
265 medRxiv received significantly higher usage per COVID-19 preprint than all other servers for which  
266 data was available (Tukey HSD; all  $p$  values  $< 0.001$ ). However, for non-COVID-19 preprints, the only  
267 observed pairwise differences between servers indicated greater bioRxiv and medRxiv usage than  
268 Research Square (Tukey HSD;  $p < 0.001$ ). This suggests specific attention has been given  
269 disproportionately to bioRxiv and medRxiv as repositories for COVID-19 research.

270 COVID-19 preprints were shared and cited more widely than non-COVID-19 preprints

271 We quantified the citation and online sharing behaviour of COVID-19 preprints using citation count  
272 data from Dimensions (<https://dimensions.ai>) and counts of various altmetric indicators using data  
273 from Altmetric (<https://altmetric.com>) (Fig 6; further details on data sources in Methods section). In  
274 terms of citations, we found higher proportions overall of COVID-19 preprints that received at least a  
275 single citation (57.9%) than non-COVID-19 preprints (21.5%) during our study period of 1<sup>st</sup> January to  
276 31<sup>st</sup> October, although the citation coverage expectedly decreased for both groups for newer posted  
277 preprints (Fig 6A). COVID-19 preprints also have greater total citation counts than non-COVID-19  
278 preprints (time-adjusted negative binomial regression; rate ratio = 13.7,  $z = 116.3$ ,  $p < 0.001$ ). The  
279 highest cited COVID-19 preprint had 652 citations, with the 10<sup>th</sup> most cited COVID-19 preprint  
280 receiving 277 citations (Table 1); many of the highest cited preprints focussed on the viral cell  
281 receptor, angiotensin converting enzyme 2 (ACE2) or the epidemiology of COVID-19.

282  
283 Sharing of preprints on Twitter may provide an indicator of the exposure of wider public audiences  
284 to preprints. COVID-19 preprints received greater Twitter coverage (98.9% received >1 tweet) than  
285 non-COVID-19 preprints (90.7%) (note that the threshold for Twitter coverage was set at 1 rather  
286 than 0, to account for automated tweets by the official bioRxiv and medRxiv twitter accounts), and  
287 were tweeted at an overall greater rate than non-COVID-19 preprints (rate ratio = 7.6,  $z = 135.7$ ,  $p <$   
288  $0.001$ ) (Fig. 6B). The most tweeted non-COVID-19 preprint received 1,656 tweets, whereas 8 of the  
289 top 10 tweeted COVID-19 preprints were tweeted over 10,500 times each (Table 2). Many of the top  
290 10 tweeted COVID-19 preprints were related to transmission, re-infection or seroprevalence. The  
291 most tweeted COVID-19 preprint (26,763 tweets) was a study investigating antibody seroprevalence  
292 in California [20]. The fourth most tweeted COVID-19 preprint was a widely criticised (and later  
293 withdrawn) study linking the SARS-CoV-2 spike protein to HIV-1 glycoproteins [21].

294  
295 To better understand the discussion topics associated with highly tweeted preprints, we analysed  
296 the hashtags used in original tweets (i.e., excluding retweets) mentioning the top-100 most tweeted  
297 COVID-19 preprints (Supplemental Fig. 4A). In total, we collected 30,213 original tweets containing  
298 11,789 hashtags; we filtered these hashtags for those occurring more than 5 times, and removed a  
299 selection of generic or overused hashtags directly referring to the virus (e.g. “#coronavirus”, “#covid-  
300 19”), leaving a final set of 2981 unique hashtags. Whilst many of the top-used hashtags were direct,  
301 neutral references to the disease outbreak such as “#coronavirusoutbreak” and “#wuhan”, we also  
302 found a large proportion of politicised tweets using hashtags associated with conspirational  
303 ideologies (e.g. “#qanon”, “#wwg1wga”, an abbreviation of “Where We Go One, We Go All” a tag

304 commonly used by QAnon supporters), xenophobia (e.g. “#chinazi”) or US-specific right-wing  
305 populism (e.g. “#maga”). Other hashtags also referred to topics directly associated with  
306 controversial preprints, e.g. “#hydroxychloroquine” and “#hiv” both of which were major  
307 controversial topics associated with several of the top ten most tweeted preprints.

308

309 As well as featuring heavily on social media, COVID-19 research has also pervaded print and online  
310 news media. In terms of coverage, 28.7% of COVID-19 preprints were featured in at least a single  
311 news article, compared to 1.0% of non-COVID-19 preprints (Fig. 6C), and were used overall in news  
312 articles at a rate almost one hundred times that of non-COVID-19 preprints (rate ratio = 92.8,  $z =$   
313  $83.3$ ,  $p < 0.001$ ). The top non-COVID-19 preprint was reported in 113 news articles whereas the top  
314 COVID-19 preprints were reported in over 400 news articles (Table 3). Similarly, COVID-19 preprints  
315 were also used more in blogs (coverage COVID-19/non-COVID-19 preprints = 14.3%/9.1%, rate ratio  
316 = 3.73,  $z = 37.3$ ,  $p < 0.001$ ) and Wikipedia articles (coverage COVID-19/non-COVID-19 preprints =  
317 0.7%/0.2%, rate ratio = 4.47,  $z = 7.893$ ,  $p < 0.001$ ) at significantly greater rates than non-COVID-19  
318 preprints (Fig. 6D, 6E; Table 4). We noted that several of the most widely-disseminated preprints  
319 that we classified as being non-COVID-19 related, featured topics nonetheless relevant to  
320 generalised infectious disease research, such as human respiratory physiology and personal  
321 protective equipment.

322

323 A potential benefit of preprints is that they allow authors to receive an incorporate feedback from  
324 the wider community prior to journal publication. To investigate feedback and engagement with  
325 preprints, we quantified the number of comments received by preprints directly via the commenting  
326 system on the bioRxiv and medRxiv platforms. We found that non-COVID-19 preprints were  
327 commented upon less frequently compared to COVID-19 preprints (coverage COVID-19/non-COVID-  
328 19 preprints = 15.9%/3.1%, time-adjusted negative binomial regression; rate ratio = 11.0,  $z = 46.5$ ,  $p$   
329  $< 0.001$ ) (Fig. 6F); the most commented non-COVID-19 preprint received only 68 comments, whereas  
330 the most commented COVID-19 preprint had over 580 comments (Table 5). One preprint, which had  
331 129 comments was retracted within 3 days of being posted following intense public scrutiny [22]. As  
332 the pandemic has progressed, fewer preprints were commented upon. Collectively these data  
333 suggest that the most discussed or controversial COVID-19 preprints are rapidly and publicly  
334 scrutinised, with commenting systems being used for direct feedback and discussion of preprints.

335

336 Within a set of 81 COVID-19 policy documents (which were manually retrieved from the European  
337 Centre for Disease Prevention and Control (ECDC), United Kingdom Parliamentary Office of Science

338 and Technology (UK POST) and World Health Organisation Scientific Briefs (WHO SB)), 52 documents  
339 cited preprints (Fig 6G). However, these citations occurred at a relatively low frequency, typically  
340 constituting less than 20% of the total citations in these 52 documents. Among 255 instances of  
341 citation to a preprint, medRxiv was the dominant server cited ( $n = 209$ , 82%), with bioRxiv receiving  
342 a small number of citations ( $n = 21$ ), and five other servers receiving  $\leq 10$  citations each (arXiv, OSF,  
343 preprints.org, Research Square, SSRN). In comparison, only 16 instances of citations to preprints  
344 were observed among 38 manually collected non-COVID-19 policy documents from the same  
345 sources.

346

347 To understand how different usage and sharing indicators may represent the behaviour of different  
348 user groups, we calculated the Spearman's correlation between the indicators presented above  
349 (citations, tweets, news articles, blog mentions, Wikipedia citations, comment counts) as well as  
350 with abstract views and download counts as previously presented (Fig. 6H, 6I). Overall, we found  
351 stronger correlations between all indicators for COVID-19 preprints compared to non-COVID-19  
352 preprints. For COVID-19 preprints, we found expectedly strong correlation between abstract views  
353 and pdf downloads (Spearman's  $\rho = 0.91$ ,  $p < 0.001$ ), weak-to-moderate correlation between the  
354 numbers of citations and Twitter shares (Spearman's  $\rho = 0.48$ ,  $p < 0.001$ ), and the numbers of  
355 citations and news articles (Spearman's  $\rho = 0.33$ ,  $p < 0.001$ ) suggesting that the preprints cited  
356 extensively within the scientific literature did not necessarily correlate with those that were mostly  
357 shared by the wider public on online platforms. There was a slightly stronger correlation between  
358 COVID-19 preprints that were most blogged and those receiving the most attention in the news  
359 (Spearman's  $\rho = 0.54$ ,  $p < 0.001$ ), and moderate correlation between COVID-19 preprints that were  
360 most tweeted and those receiving the most attention in the news (Spearman's  $\rho = 0.51$ ,  $p < 0.001$ ),  
361 suggesting similarity between preprints shared on social media and in news media. Finally, there was  
362 a weak correlation between the number of tweets and number of comments received by COVID-19  
363 preprints (Spearman's  $\rho = 0.36$ ,  $p < 0.001$ ). Taking the top ten COVID-19 preprints by each indicator,  
364 there was substantial overlap between all indicators except citations (Supplemental Fig. 4B).

365

366 In summary, our data reveal that COVID-19 preprints received a significant amount of attention from  
367 scientists, news organisations, the general public and policy making bodies, representing a departure  
368 for how preprints are normally shared (considering observed patterns for non-COVID-19 preprints).

369

370 **Table 1. Top 10 cited COVID-19 preprints**

371 **Table 2. Top 10 tweeted COVID-19 preprints**

372 **Table 3. Top 10 COVID-19 preprints covered by news organisations**

373 **Table 4. Top 10 most commented COVID-19 preprints**

374 **Table 5. Top 10 most blogged COVID-19 preprints**

375

## 376 Discussion

377 The usage of preprint servers within the biological sciences has been rising since the inception of  
378 bioRxiv and other platforms [7,23]. The urgent threat of a global pandemic has catapulted the use of  
379 preprint servers as a means of quickly disseminating scientific findings into the public sphere,  
380 supported by funding bodies encouraging preprinting for COVID-19 research [24,25]. Our results  
381 show that preprints have been widely adopted for the dissemination and communication of COVID-  
382 19 research, and in turn, the pandemic has greatly impacted the preprint and science publishing  
383 landscape [26].

384 Changing attitudes and acceptance within the life sciences to preprint servers may be one reason  
385 why COVID-19 research is being shared more readily as preprints compared to previous epidemics.  
386 In addition, the need to rapidly communicate findings prior to a lengthy review process might be  
387 responsible for this observation (Fig. 3). A recent study involving qualitative interviews of multiple  
388 research stakeholders found “early and rapid dissemination” to be amongst the most often cited  
389 benefits of preprints [16]. These findings were echoed in a survey of ~4200 bioRxiv users [7] and are  
390 underscored by the 6-month median lag between posting of a preprint and subsequent journal  
391 publication [10,16]. Such timelines for disseminating findings are clearly incompatible with the  
392 lightning-quick progression of a pandemic. An analysis of publication timelines for 14 medical  
393 journals has shown that some publishers have taken steps to accelerate their publishing processes  
394 for COVID-19 research, reducing the time for the peer-review stage (submission to acceptance) on  
395 average by 45 days, and the editing stage (acceptance to publication) by 14 days [27], yet this still  
396 falls some way short of the ~1-3 day screening time for bioRxiv and medRxiv preprints (Fig. 2B). This  
397 advantage may influence the dynamics of preprint uptake: as researchers in a given field begin to  
398 preprint, their colleagues may feel pressure to also preprint in order to avoid being scooped. Further  
399 studies on understanding the motivations behind posting preprints, for example through  
400 quantitative and qualitative author surveys may help funders and other stakeholders that support  
401 the usage of preprints to address some of the social barriers for their uptake [28].

402 One of the primary concerns amongst authors around posting preprints is premature media  
403 coverage [16,29]. Many preprint servers created highly-visible collections of COVID-19 work,

404 potentially amplifying its visibility. From mid-March 2020, bioRxiv and medRxiv included a banner to  
405 explain that preprints should not be regarded as conclusive and not reported on in the news media  
406 as established information [30]. Despite this warning message, COVID-19 preprints have received  
407 unprecedented coverage on online media platforms (Fig. 6). Indeed, even before this warning  
408 message was posted, preprints were receiving significant amounts of attention. Twitter has been a  
409 particularly notable outlet for communication of preprints, a finding echoed by a recent study on the  
410 spread of the wider (i.e., not limited to preprints) COVID-19 research field on Twitter, which found  
411 that COVID-19 research was being widely disseminated and driven largely by academic Twitter users  
412 [31,32]. Nonetheless, the relatively weak correlation found between citations and other indicators of  
413 online sharing (Fig 6H) suggests that the interests of scientists versus the broader public differ  
414 significantly: of the articles in the top 10 most shared on twitter, in news articles or on blogs, only  
415 one is ranked amongst the top 10 most cited articles (Supplemental Fig. 4B). Hashtags associated  
416 with individual, highly tweeted preprints reveal some emergent themes that suggest communication  
417 of certain preprints can also extend well beyond scientific audiences (Supplemental Fig. 4A) [32].  
418 These range from good public health practice (“#washyourhands”) to right-wing philosophies  
419 (#chinalies), conspiracy theories (“#fakenews” and “#endthelockdown”) and xenophobia  
420 (“#chinazi”). Many of the negative hashtags have been perpetuated by public figures such as the  
421 President of America and the right-wing media [33,34]. Following President Trump’s diagnosis of  
422 COVID-19, one investigation found a wave of anti-Asian sentiment and conspiracy theories across  
423 Twitter [35]. This type of misinformation is common to new diseases [19] and social media platforms  
424 have recently released a statement outlining their plans to combat this issue [36]. An even greater  
425 adoption of open science principles has recently been suggested as one method to counter the  
426 misuse of preprints and peer-reviewed articles [22]; this remains an increasingly important  
427 discourse.

428 The fact that news outlets are reporting extensively on COVID-19 preprints (Fig. 6C and 6D)  
429 represents a marked change in journalistic practice: pre-pandemic, bioRxiv preprints received very  
430 little coverage in comparison to journal articles [23]. This cultural shift provides an unprecedented  
431 opportunity to bridge the scientific and media communities to create a consensus on the reporting  
432 of preprints [37,38]. Another marked change was observed in the use of preprints in policy  
433 documents (Fig. 6G). Preprints were remarkably underrepresented in non-COVID-19 policy  
434 documents yet present, albeit at relatively low levels, in COVID-19 policy documents. In a larger  
435 dataset, two of the top 10 journals which are being cited in policy documents were found to be  
436 preprint servers (medRxiv and SSRN in 5<sup>th</sup> and 8<sup>th</sup> position respectively) [39]. This suggests that  
437 preprints are being used to directly influence policy-makers and decision making. We only



438 investigated a limited set of policy documents, largely restricted to Europe; whether this extends  
439 more globally remains to be explored [40]. In the near future, we aim to examine the use of  
440 preprints in policy in more detail to address these questions.

441 As most COVID-19-preprints were not yet published, concerns regarding quality will persist [41]. This  
442 is partially addressed by prominent scientists using social media platforms such as Twitter to publicly  
443 share concerns about poor quality COVID-19 preprints or to amplify high-quality preprints [42]. The  
444 use of Twitter to “peer-review” preprints provides additional public scrutiny of manuscripts that can  
445 complement the more opaque and slower traditional peer-review process. In addition to Twitter,  
446 the comments section of preprint servers can be used as a public forum for discussion and review.  
447 However, an analysis of all bioRxiv comments to September 2019 found a very limited number of  
448 peer-review style comments [43]. Despite increased publicity for established preprint-review  
449 services (such as PREREVIEW [44,45]), there has been limited use of these platforms [46]. However,  
450 independent preprint-review projects have arisen whereby reviews are posted in the comments  
451 section of preprint servers or hosted on independent websites [47,48]. These more formal projects  
452 partly account for the increased commenting on the most-high profile COVID-19 preprints (Fig. 4).  
453 Although these new review platforms partially combat poor-quality preprints, it is clear that there is  
454 a dire need to better understand the general quality and trustworthiness of preprints compared to  
455 peer-review articles. Recent studies have suggested that the quality of reporting in preprints differs  
456 little from their later peer-reviewed articles [49] and we ourselves are currently undertaking a more  
457 detailed analysis. However, the problem of poor-quality science is not unique to preprints and  
458 ultimately, a multi-pronged approach is required to solve some of these issues. For example,  
459 scientists must engage more responsibly with journalists and the public, in addition to upholding  
460 high standards when sharing research. More significant consequences for academic misconduct and  
461 the swift removal of problematic articles will be essential in aiding this. Moreover, the politicisation  
462 of public health research has become a polarising issue and more must be done to combat this;  
463 scientific advice should be objective and supported by robust evidence. Media outlets and politicians  
464 should not use falsehoods or poor-quality science to further a personal agenda. Thirdly,  
465 transparency within the scientific process is essential in improving the understanding of its internal  
466 dynamics and providing accountability.

467 Our data demonstrates the indispensable role that preprints, and preprint servers, are playing  
468 during a global pandemic. By communicating science through preprints, we are sharing research at a  
469 faster rate and with greater transparency than allowed by the current journal infrastructure.



470 Furthermore, we provide evidence for important future discussions around scientific publishing and  
471 the use of preprint servers.

472

## 473 [Methods](#)

474

### 475 [Preprint Metadata for bioRxiv and medRxiv](#)

476 We retrieved basic preprint metadata (DOIs, titles, abstracts, author names, corresponding author  
477 name and institution, dates, versions, licenses, categories and published article links) for bioRxiv and  
478 medRxiv preprints via the bioRxiv Application Programming Interface (API; <https://api.biorxiv.org>).  
479 The API accepts a 'server' parameter to enable retrieval of records for both bioRxiv and medRxiv. We  
480 initially collected metadata for all preprints posted from the time of the server's launch,  
481 corresponding to November 2013 for bioRxiv and June 2019 for medRxiv, until the end of our  
482 analysis period on 31st October 2020 (N = 114,214). Preprint metadata, and metadata related to  
483 their linked published articles, were collected in the first week of December 2020. Note that where  
484 multiple preprint versions existed, we included only the earliest version and recorded the total  
485 number of following revisions. Preprints were classified as "COVID-19 preprints" or "non-COVID-19  
486 preprints" on the basis of the following terms contained within their titles or abstracts (case-  
487 insensitive): "coronavirus", "covid-19", "sars-cov", "ncov-2019", "2019-ncov", "hcov-19", "sars-2".  
488 For comparison of preprint behaviour between the COVID-19 outbreak and previous viral epidemics,  
489 namely Western Africa Ebola virus and Zika virus (Supplemental Fig. 1), the same procedure was  
490 applied using the keywords "ebola" or "zebov", and "zika" or "zikv", respectively.

491 For a subset of preprints posted between 1st September 2019 and 30th April 2020 (N = 25,883), we  
492 enhanced the basic preprint metadata with data from a number of other sources, as outlined below.  
493 Note that this time period was chosen to encapsulate a 10-month analysis period from 1st January  
494 to 31st October 2020, in which we make comparative analysis between COVID-19 and non-COVID-19  
495 related preprints, (N = 44,503), as well as the preceding year from 1st January to 31<sup>st</sup> December 2019  
496 (N = 30,094), to use as a pre-COVID-19 control group. Of the preprints contained in the 10-month  
497 analysis period, 10,232 (23.0%) contained COVID-19 related keywords in their titles or abstracts.

498 For all preprints contained in the subset, disambiguated author affiliation and country data for  
499 corresponding authors were retrieved by querying raw affiliation strings against the Research  
500 Organisation Registry (ROR) API (<https://github.com/ror-community/ror-api>). The API provides a  
501 service for matching affiliation strings against institutions contained in the registry, on the basis of

502 multiple matching types (named “phrase”, “common terms”, “fuzzy”, “heuristics”, and “acronyms”).  
503 The service returns a list of potential matched institutions and their country, as well as the matching  
504 type used, a confidence score with values between 0 and 1, and a binary “chosen” indicator relating  
505 to the most confidently matched institution. A small number (~500) of raw affiliation strings  
506 returned from the bioRxiv API were truncated at 160 characters; for these records we conducted  
507 web-scraping using the rvest package for R [50] to retrieve the full affiliation strings of corresponding  
508 authors from the bioRxiv public webpages, prior to matching. For the purposes of our study, we  
509 aimed for higher precision than recall, and thus only included matched institutions where the API  
510 returned a confidence score of 1. A manual check of a sample of returned results also suggested  
511 higher precision for results returned using the “phrase” matching type, and thus we only retained  
512 results using this matching type. In a final step, we applied manual corrections to the country  
513 information for a small subset of records where false positives would be most likely to influence our  
514 results by a) iteratively examining the chronologically first preprint associated with each country  
515 following affiliation matching and applying manual rules to correct mismatched institutions until no  
516 further errors were detected (n = 8 institutions); and b) examining the top 50 most common raw  
517 affiliation strings and applying manual rules to correct any mismatched or unmatched institutions (n  
518 = 2 institutions). In total, we matched 54,289 preprints to a country (72.8%); for COVID-19 preprints  
519 alone, 6,692 preprints (65.4%) were matched to a country. Note that a similar, albeit more  
520 sophisticated method of matching bioRxiv affiliation information with the ROR API service was  
521 recently documented by Abdill et al. [51].

522 Word counts and reference counts for each preprint were also added to the basic preprint metadata  
523 via scraping of the bioRxiv public webpages (medRxiv currently does not display full HTML texts, and  
524 so calculating word and reference counts was limited to bioRxiv preprints). Web scraping was  
525 conducted using the rvest package for R [50]. Word counts refer to words contained only in the main  
526 body text, after removing the abstract, figure captions, table captions, acknowledgements and  
527 references. In a small number of cases, word counts could not be retrieved because no full-text  
528 existed; this occurs as we targeted only the first version of a preprint, but in cases where a second  
529 version was uploaded very shortly (i.e., within a few days) after the first version, the full-text article  
530 was generated only for the second version. Word and reference counts were retrieved for 61,397 of  
531 61,866 bioRxiv preprints (99.2%); for COVID-19 preprints alone, word and reference counts were  
532 retrieved for 2314 of 2333 preprints (99.2 %). Word counts ranged from 408 to 49,064 words, whilst  
533 reference counts ranged from 1 to 566 references.

534 Our basic preprint metadata retrieved from the bioRxiv API also contained DOI links to published  
535 versions (i.e., a peer-reviewed journal article) of preprints, where available. In total, 22,151 records

536 in our preprint subset (29.7%) contained links to published articles, although of COVID-19 preprints  
537 only 2,164 preprints contained such links (21.1%). It should be noted that COVID-19 articles are  
538 heavily weighted towards the most recent months of the dataset and have thus had less time to  
539 progress through the journal publication process. Links to published articles are likely an  
540 underestimate of the total proportion of articles that have been subsequently published in journals –  
541 both as a result of the delay between articles being published in a journal and being detected by  
542 bioRxiv, and bioRxiv missing some links to published articles when e.g., titles change significantly  
543 between the preprint and published version [23]. Published article metadata (titles, abstracts,  
544 publication dates, journal and publisher name) were retrieved by querying each DOI against the  
545 Crossref API (<https://api.crossref.org>), using the rcrossref package for R [52]. With respect to  
546 publication dates, we use the Crossref “created” field which represent the date on which metadata  
547 was first deposited and has been suggested as a good proxy of the first online availability of an  
548 article [53,54]. When calculating delay from preprint posting to publication dates, erroneous  
549 negative values (i.e., preprints posted after published versions) were ignored. We also retrieved data  
550 regarding the open access status of each article by querying each DOI against the Unpaywall API  
551 (<https://unpaywall.org/products/api>), via the roadoi package for R [55].

#### 552 Usage, Altmetrics and Citation Data

553 For investigating the rates at which preprints are used, shared and cited, we collected detailed  
554 usage, altmetrics and citation data for all bioRxiv and medRxiv preprints posted between 1st January  
555 2019 to 31st October 2020 (i.e., for every preprint where we collected detailed metadata, as  
556 described in the previous section). All usage, altmetrics and citation data were collected in the first  
557 week of December 2020.

558 Usage data (abstract views and pdf downloads) were scraped from the bioRxiv and medRxiv public  
559 webpages, using the rvest package for R [50]. bioRxiv and medRxiv webpages display abstract views  
560 and pdf downloads on a calendar month basis; for subsequent analysis (e.g Figure 4), these were  
561 summed to generate total abstract views and downloads since the time of preprint posting. In total,  
562 usage data were recorded for 74,461 preprints (99.8%) – a small number were not recorded,  
563 possibly due to server issues during the web scraping process. Note that bioRxiv webpages also  
564 display counts of full-text views, although we did not include these data in our final analysis. This  
565 was partially to ensure consistency with medRxiv, which currently does not provide display full HTML  
566 texts, and partially due to ambiguities in the timeline of full-text publishing – the full text of a  
567 preprint is added several days after the preprint is first available, but the exact delay appears to vary  
568 from preprint to preprint. We also compared rates of PDF downloads for bioRxiv and medRxiv

569 preprints with other preprint servers (SSRN and Research Square) (Supplemental Fig. 3C) - these  
570 data were provided directly by representatives of each of the respective preprint servers.

571 Counts of multiple altmetric indicators (mentions in tweets, blogs, and news articles) were retrieved  
572 via Altmetric (<https://www.altmetric.com>), a service that monitors and aggregates mentions to  
573 scientific articles on various online platforms. Altmetric provide a free API (<https://api.altmetric.com>)  
574 against which we queried each preprint DOI in our analysis set. Importantly, Altmetric only contains  
575 records where an article has been mentioned in at least one of the sources tracked, thus, if our  
576 query returned an invalid response we recorded counts for all indicators as zero. Coverage of each  
577 indicator (i.e., the proportion of preprints receiving at least a single mention in a particular source)  
578 for preprints were 99.3%, 10.3%, 7.4%, and 0.33 for mentions in tweets, blogs news, and Wikipedia  
579 articles respectively. The high coverage on Twitter is likely driven, at least in part, by automated  
580 tweeting of preprints by the official bioRxiv and medRxiv twitter accounts. For COVID-19 preprints,  
581 coverage was found to be 99.99%, 14.3%, 28.7% and 0.76% for mentions in tweets, blogs, news and  
582 Wikipedia articles respectively.

583 To quantitatively capture how high-usage preprints were being received by Twitter users, we  
584 retrieved all tweets linking to the top ten most-tweeted preprints. Tweet IDs were retrieved via the  
585 Altmetric API service, and then queried against the Twitter API using the rtweet package [56] for R,  
586 to retrieve full tweet content.

587 Citations counts for each preprint were retrieved from the scholarly indexing database Dimensions  
588 (<https://dimensions.ai>). An advantage of using Dimensions in comparison to more traditional  
589 citation databases (e.g., Scopus, Web of Science) is that Dimensions also includes preprints from  
590 several sources within their database (including from bioRxiv and medRxiv), as well as their  
591 respective citation counts. When a preprint was not found, we recorded its citation counts as zero.  
592 Of all preprints, 13,298 (29.9%) recorded at least a single citation in Dimensions. For COVID-19  
593 preprints, 5,294 preprints (57.9%) recorded at least a single citation.

#### 594 [Comments](#)

595 BioRxiv and medRxiv html pages feature a Disqus (<https://disqus.com>) comment platform to allow  
596 readers to post text comments. Comment counts for each bioRxiv and medRxiv preprint were  
597 retrieved via the Disqus API service (<https://disqus.com/api/docs/>). Where multiple preprint  
598 versions existed, comments were aggregated over all versions. Text content of comments for COVID-  
599 19 preprints were provided directly by the bioRxiv development team.

## 600 Screening time for bioRxiv and medRxiv

601 To calculate screening time, we followed the method outlined by Steve Royle [57]. In short, we  
602 calculate the screening time as the difference in days between the preprint posting date, and the  
603 date stamp of submission approval contained within bioRxiv and medRxiv DOIs (only available for  
604 preprints posted after December 11<sup>th</sup> 2019). bioRxiv and medRxiv preprints were filtered to  
605 preprints posted between January 1<sup>st</sup> – October 31<sup>st</sup> 2020, accounting for the first version of a  
606 posted preprint.

## 607 Policy documents

608 To describe the level of reliance upon preprints in policy documents, a set of policy documents were  
609 manually collected from the following institutional sources: the European Centre for Disease  
610 Prevention and Control (including rapid reviews and technical reports), UK Parliamentary Office of  
611 Science and Technology and the WHO (n = 81 COVID-19 related policies, n = 38 non-COVID-19  
612 related policies). COVID-19 policy documents were selected from 1<sup>st</sup> January 2020 – 31<sup>st</sup> October  
613 2020. Due to the limited number of non-COVID-19 policy documents from the same time period,  
614 these documents were selected dating back to September 2018. Reference lists of each policy  
615 document were then text-mined and manually verified to calculate the proportion of references that  
616 were preprints.

## 617 Journal Article Data

618 To compare posting rates of COVID-19 preprints against publication rates of articles published in  
619 scientific journals (Figure 1B), we extracted a dataset of COVID-19 journal articles from Dimensions  
620 (<https://www.dimensions.ai>), via the Dimensions Analytics API service. Journal articles were  
621 extracted based on presence of the following terms (case-insensitive) in their titles or abstracts:  
622 “coronavirus”, “covid-19”, “sars-cov”, “ncov-2019”, “2019-ncov”, “hcov-19”, “sars-2”. Data were  
623 extracted in the first week of December 2020, and covered the period 1<sup>st</sup> January 2020 to 31<sup>st</sup>  
624 October 2020. To ensure consistency of publication dates with our dataset of preprints, journal  
625 articles extracted from Dimensions were matched with records in Crossref on the basis of their DOIs  
626 (via the Crossref API using the `rcrossref` package for R [52]), and the Crossref “created” field was  
627 used as the publication date. The open access status of each article (Supplemental Figure 1B) was  
628 subsequently determined by querying each DOI against the Unpaywall API via the `roadoi` package for  
629 R [55].

## 630 Statistical analyses

631 Preprint counts were compared across categories (e.g., COVID-19 or non-COVID-19) using Chi-square  
632 tests. Quantitative preprint metrics (e.g., word count, comment count) were compared across

633 categories using Mann-Whitney tests and correlated with other quantitative metrics using  
634 Spearman's rank tests for univariate comparisons.

635 For time-variant metrics (e.g., views, downloads, which may be expected to vary with length of  
636 preprint availability), we analysed the difference between COVID-19 and non-COVID-19 preprints  
637 using generalised linear regression models with calendar days since Jan 1<sup>st</sup> 2020 as an additional  
638 covariate and negative binomially-distributed errors. This allowed estimates of time-adjusted rate  
639 ratios comparing COVID-19 and non-COVID-19 preprint metrics. Negative binomial regressions were  
640 constructed using the function 'glm.nb' in R package MASS [58]. For multivariate categorical  
641 comparisons of preprint metrics (e.g., screening time between preprint type and preprint server or  
642 publication delay between preprint type and publisher for top 10 publishers), we constructed two-  
643 way factorial ANOVAs, testing for interactions between both category variables in all cases. Pairwise  
644 post-hoc comparisons of interest were tested using Tukey's honest significant difference (HSD) while  
645 correcting for multiple testing, using function 'glht' while setting multiple comparisons to "Tukey" in  
646 R package multcomp [53].

#### 647 [Parameters and limitations of this study](#)

648 We acknowledge a number of limitations in our study. Firstly, to assign a preprint as COVID-19 or  
649 not, we used keyword matching to titles/abstracts on the preprint version at the time of our data  
650 extraction. This means we may have captured some early preprints, posted before the pandemic  
651 that had been subtly revised to include a keyword relating to COVID-19. Our data collection period  
652 was a tightly defined window (January-October 2020) which may impact upon the altmetric and  
653 usage data we collected as those preprints posted at the end of October would have had less time to  
654 accrue these metrics.

#### 655 [Acknowledgements](#)

656 The authors would like to thank Ted Roeder, John Inglis and Richard Sever from bioRxiv and medRxiv  
657 for providing information relating to comments on COVID-19 preprints. We would also like to thank  
658 Martyn Rittman (preprints.org), Shirley Decker-Lucke (SSRN) and Michele Avissar-Whiting (Research  
659 Square) for kindly providing usage data. Further thanks to Helena Brown and Sarah Bunn for  
660 conversations regarding media usage and government policy. NF acknowledges funding from the  
661 German Federal Ministry for Education and Research, grant numbers 01PU17005B (OASE) and  
662 01PU17011D (QuaMedFo). LB acknowledges funding from a Medical Research Council Skills  
663 Development Fellowship award, grant number MR/T027355/1.

## 664 Author contributions

665 Conceptualisation, N.F., L.B., G.D., J.K.P., M.P., J.A.C.; Methodology, N.F., L.B., J.A.C.; Software, N.F.,  
666 L.B.; Validation, N.F., L.B., J.A.C.; Formal analysis, N.F., L.B., J.A.C.; Investigation, N.F., L.B., G.D.,  
667 J.K.P., M.P., J.A.C.; Resources, J.K.P. and J.A.C.; Data curation, N.F., L.B., J.A.C.; Writing – original  
668 draft, N.F., L.B., G.D., J.K.P., M.P., J.A.C.; Writing – Review & editing, N.F., L.B., G.D., J.K.P., M.P., F.N.,  
669 J.A.C.; Visualisation, N.F., L.B., J.A.C.; Supervision, J.A.C.; Project administration, J.A.C.; Funding  
670 Acquisition, L.B.

## 671 Data availability

672 All data and code used in this study are available on GitHub ([https://github.com/preprinting-a-](https://github.com/preprinting-a-pandemic/pandemic_preprints)  
673 [pandemic/pandemic\\_preprints](https://github.com/preprinting-a-pandemic/pandemic_preprints)) and Zenodo ([DOI: 10.5281/zenodo.4501924](https://doi.org/10.5281/zenodo.4501924)).

## 674 Declaration of interests

675 JP is the executive director of ASAPbio, a non-profit organization promoting the productive use of  
676 preprints in the life sciences. GD is a bioRxiv Affiliate, part of a volunteer group of scientists that  
677 screen preprints deposited on the bioRxiv server. MP is the community manager for preLights, a  
678 non-profit preprint highlighting service. GD and JAC are contributors to preLights and ASAPbio  
679 Fellows. The authors declare no other competing interests.

680

## 681 References

- 682 1. WHO. COVID-19 Weekly Epidemiological Update-11. 2020 Oct. Available:  
683 [https://www.who.int/docs/default-source/coronaviruse/situation-reports/weekly-epi-update-](https://www.who.int/docs/default-source/coronaviruse/situation-reports/weekly-epi-update-11.pdf)  
684 [11.pdf](https://www.who.int/docs/default-source/coronaviruse/situation-reports/weekly-epi-update-11.pdf).
- 685 2. Zhu N, Zhang D, Wang W, Li X, Yang B, Song J, et al. A Novel Coronavirus from Patients with  
686 Pneumonia in China, 2019. *N Engl J Med*. 2020;382: 727–733. doi:10.1056/NEJMoa2001017
- 687 3. WHO. Coronavirus Disease (COVID-19) Weekly Epidemiological Update - 24. 2021 Jan.  
688 Available: [https://www.who.int/docs/default-source/coronaviruse/situation-](https://www.who.int/docs/default-source/coronaviruse/situation-reports/20210127_weekly_epi_update_24.pdf)  
689 [reports/20210127\\_weekly\\_epi\\_update\\_24.pdf](https://www.who.int/docs/default-source/coronaviruse/situation-reports/20210127_weekly_epi_update_24.pdf)
- 690 4. Coronaviridae Study Group of the International Committee on Taxonomy of Viruses. The  
691 species Severe acute respiratory syndrome-related coronavirus: classifying 2019-nCoV and  
692 naming it SARS-CoV-2. *Nat Microbiol*. 2020;5: 536–544. doi:10.1038/s41564-020-0695-z
- 693 5. Ksiazek TG, Erdman D, Goldsmith CS, Zaki SR, Peret T, Emery S, et al. A Novel Coronavirus  
694 Associated with Severe Acute Respiratory Syndrome. In:  
695 <http://dx.doi.org/10.1056/NEJMoa030781> [Internet]. Massachusetts Medical Society; 7 Oct  
696 2009 [cited 13 May 2020]. doi:10.1056/NEJMoa030781



- 697 6. Zaki AM, van Boheemen S, Bestebroer TM, Osterhaus ADME, Fouchier RAM. Isolation of a  
698 Novel Coronavirus from a Man with Pneumonia in Saudi Arabia. *N Engl J Med*. 2012;367: 1814–  
699 1820. doi:10.1056/NEJMoa1211721
- 700 7. Sever R, Roeder T, Hindle S, Sussman L, Black K-J, Argentine J, et al. bioRxiv: the preprint server  
701 for biology. *bioRxiv*. 2019; 833400. doi:10.1101/833400
- 702 8. Kaiser J, 2014, Am 12:00. BioRxiv at 1 year: A promising start. In: *Science | AAAS [Internet]*. 11  
703 Nov 2014 [cited 13 May 2020]. Available: [https://www.sciencemag.org/news/2014/11/biorxiv-](https://www.sciencemag.org/news/2014/11/biorxiv-1-year-promising-start)  
704 [1-year-promising-start](https://www.sciencemag.org/news/2014/11/biorxiv-1-year-promising-start)
- 705 9. Rawlinson C, Bloom T. New preprint server for medical research. *BMJ*. 2019;365.  
706 doi:10.1136/bmj.l2301
- 707 10. Abdill RJ, Blekhman R. Tracking the popularity and outcomes of all bioRxiv preprints. Pewsey E,  
708 Rodgers P, Greene CS, editors. *eLife*. 2019;8: e45133. doi:10.7554/eLife.45133
- 709 11. Wallach JD, Egilman AC, Gopal AD, Swami N, Krumholz HM, Ross JS. Biomedical journal speed  
710 and efficiency: a cross-sectional pilot survey of author experiences. *Res Integr Peer Rev*.  
711 2018;3: 1. doi:10.1186/s41073-017-0045-8
- 712 12. Björk B-C, Solomon D. The publishing delay in scholarly peer-reviewed journals. *J Informetr*.  
713 2013;7: 914–923. doi:10.1016/j.joi.2013.09.001
- 714 13. Wellcome Trust. Sharing data during Zika and other global health emergencies | Wellcome. In:  
715 *Wellcome.ac.uk [Internet]*. 10 Feb 2016 [cited 13 May 2020]. Available:  
716 <https://wellcome.ac.uk/news/sharing-data-during-zika-and-other-global-health-emergencies>
- 717 14. Johansson MA, Reich NG, Meyers LA, Lipsitch M. Preprints: An underutilized mechanism to  
718 accelerate outbreak science. *PLOS Med*. 2018;15: e1002549.  
719 doi:10.1371/journal.pmed.1002549
- 720 15. Fraser N, Kramer B. covid19\_preprints. 2020. doi:10.6084/m9.figshare.12033672.v16
- 721 16. Chiarelli A, Johnson R, Pinfield S, Richens E. Preprints and Scholarly Communication: An  
722 Exploratory Qualitative Study of Adoption, Practices, Drivers and Barriers. *F1000Research*.  
723 2019;8: 971. doi:10.12688/f1000research.19619.2
- 724 17. Himmelstein D. The licensing of bioRxiv preprints. Satoshi Village. 2016 [cited 19 May 2020].  
725 Available: <https://blog.dhimmel.com/biorxiv-licenses/>
- 726 18. ASAPbio. [asapbio/licensing](https://github.com/asapbio/licensing). ASAPbio; 2018. Available: <https://github.com/asapbio/licensing>
- 727 19. Mian A, Khan S. Coronavirus: the spread of misinformation. *BMC Med*. 2020;18.  
728 doi:10.1186/s12916-020-01556-3
- 729 20. Bendavid E, Mulaney B, Sood N, Shah S, Ling E, Bromley-Dulfano R, et al. COVID-19 Antibody  
730 Seroprevalence in Santa Clara County, California. *medRxiv*. 2020; 2020.04.14.20062463.  
731 doi:10.1101/2020.04.14.20062463
- 732 21. Pradhan P, Pandey AK, Mishra A, Gupta P, Tripathi PK, Menon MB, et al. Uncanny similarity of  
733 unique inserts in the 2019-nCoV spike protein to HIV-1 gp120 and Gag. *bioRxiv*. 2020;  
734 2020.01.30.927871. doi:10.1101/2020.01.30.927871

- 735 22. Besançon L, Peiffer-Smadja N, Segalas C, Jiang H, Masuzzo P, Smout C, et al. Open Science  
736 Saves Lives: Lessons from the COVID-19 Pandemic. bioRxiv. 2020; 2020.08.13.249847.  
737 doi:10.1101/2020.08.13.249847
- 738 23. Fraser N, Momeni F, Mayr P, Peters I. The relationship between bioRxiv preprints, citations and  
739 altmetrics. Quant Sci Stud. 2020; 1–21. doi:10.1162/qss\_a\_00043
- 740 24. Wellcome Trust. Coronavirus (COVID-19): sharing research data | Wellcome. 31 Jan 2020 [cited  
741 21 May 2020]. Available: <https://wellcome.ac.uk/coronavirus-covid-19/open-data>
- 742 25. Wellcome Trust. Publishers make coronavirus (COVID-19) content freely available and reusable  
743 | Wellcome. 16 Mar 2020 [cited 21 May 2020]. Available: [https://wellcome.ac.uk/press-  
744 release/publishers-make-coronavirus-covid-19-content-freely-available-and-reusable](https://wellcome.ac.uk/press-release/publishers-make-coronavirus-covid-19-content-freely-available-and-reusable)
- 745 26. Ioannidis JPA, Salholz-Hillel M, Boyack KW, Baas J. The rapid, massive infection of the scientific  
746 literature and authors by COVID-19. bioRxiv. 2020; 2020.12.15.422900.  
747 doi:10.1101/2020.12.15.422900
- 748 27. Horbach SPJM. Pandemic publishing: Medical journals strongly speed up their publication  
749 process for COVID-19. Quant Sci Stud. 2020;1: 1056–1067. doi:10.1162/qss\_a\_00076
- 750 28. Penfold NC, Polka JK. Technical and social issues influencing the adoption of preprints in the  
751 life sciences. PLOS Genet. 2020;16: e1008565. doi:10.1371/journal.pgen.1008565
- 752 29. ASAPbio. Preprint authors optimistic about benefits: preliminary results from the  
753 #bioPreprints2020 survey. In: ASAPbio [Internet]. 27 Jul 2020 [cited 1 Feb 2021]. Available:  
754 <https://asapbio.org/biopreprints2020-survey-initial-results>
- 755 30. Inglis J. We've just put an additional, cautionary note about the use of preprints on every  
756 @biorxivpreprint <https://t.co/08eSXL4dDi>. In: Twitter [Internet]. 1 Feb 2020 [cited 22 May  
757 2020]. Available: <https://twitter.com/johringlis/status/1223598414493077505>
- 758 31. Fang Z, Costas R. Tracking the Twitter attention around the research efforts on the COVID-19  
759 pandemic. ArXiv200605783 Cs. 2020 [cited 16 Sep 2020]. Available:  
760 <http://arxiv.org/abs/2006.05783>
- 761 32. Carlson J, Harris K. Quantifying and contextualizing the impact of bioRxiv preprints through  
762 automated social media audience segmentation. PLOS Biol. 2020;18: e3000860.  
763 doi:10.1371/journal.pbio.3000860
- 764 33. Yaqub U. Tweeting During the Covid-19 Pandemic: Sentiment Analysis of Twitter Messages by  
765 President Trump. Digit Gov Res Pract. 2021;2: 1–7. doi:10.1145/3428090
- 766 34. Gruzd A, Mai P. Going viral: How a single tweet spawned a COVID-19 conspiracy theory on  
767 Twitter. Big Data Soc. 2020;7: 2053951720938405. doi:10.1177/2053951720938405
- 768 35. Anti-Defamation League. At the Extremes: The 2020 Election and American Extremism | Part 3.  
769 In: At the Extremes: The 2020 Election and American Extremism | Part 3 [Internet]. 10 Aug  
770 2020 [cited 27 Jan 2021]. Available: [https://www.adl.org/blog/at-the-extremes-the-2020-  
771 election-and-american-extremism-part-3](https://www.adl.org/blog/at-the-extremes-the-2020-election-and-american-extremism-part-3)

- 772 36. Lally C, Christie L. COVID-19 misinformation. UK Parliam POST. 2020 [cited 21 May 2020].  
773 Available: <https://post.parliament.uk/analysis/covid-19-misinformation/>,  
774 <https://post.parliament.uk/analysis/covid-19-misinformation/>
- 775 37. Sheldon T. Preprints could promote confusion and distortion. *Nature*. 2018;559: 445–446.
- 776 38. Fleerackers A, Riedlinger M, Moorhead L, Ahmed R, Alperin JP. Communicating Scientific  
777 Uncertainty in an Age of COVID-19: An Investigation into the Use of Preprints by Digital Media  
778 Outlets. *Health Commun*. 2021;0: 1–13. doi:10.1080/10410236.2020.1864892
- 779 39. Adie E. COVID-19-policy dataset. 2020. doi:10.6084/m9.figshare.12055860.v2
- 780 40. Yin Y, Gao J, Jones BF, Wang D. Coevolution of policy and science during the pandemic.  
781 *Science*. 2021;371: 128–130. doi:10.1126/science.abe3084
- 782 41. Bagdasarian N, Cross GB, Fisher D. Rapid publications risk the integrity of science in the era of  
783 COVID-19. *BMC Med*. 2020;18: 192. doi:10.1186/s12916-020-01650-6
- 784 42. Markus A, Oransky I, Retraction Watch. Eye for Manipulation: A Profile of Elisabeth Bik. In: *The*  
785 *Scientist Magazine*® [Internet]. 7 May 2019 [cited 21 May 2020]. Available: [https://www.the-](https://www.the-scientist.com/news-opinion/eye-for-manipulation--a-profile-of-elisabeth-bik-65839)  
786 [scientist.com/news-opinion/eye-for-manipulation--a-profile-of-elisabeth-bik-65839](https://www.the-scientist.com/news-opinion/eye-for-manipulation--a-profile-of-elisabeth-bik-65839)
- 787 43. Malički M, Costello J, Alperin JP, Maggio LA. From amazing work to I beg to differ - analysis of  
788 bioRxiv preprints that received one public comment till September 2019. *bioRxiv*. 2020;  
789 2020.10.14.340083. doi:10.1101/2020.10.14.340083
- 790 44. OASPA. COVID-19 Publishers Open Letter of Intent - Rapid Review. In: OASPA [Internet]. 27  
791 May 2020 [cited 13 May 2020]. Available: [https://oaspa.org/covid-19-publishers-open-letter-](https://oaspa.org/covid-19-publishers-open-letter-of-intent-rapid-review/)  
792 [of-intent-rapid-review/](https://oaspa.org/covid-19-publishers-open-letter-of-intent-rapid-review/)
- 793 45. Johansson MA, Saderi D. Open peer-review platform for COVID-19 preprints. *Nature*.  
794 2020;579: 29–29. doi:10.1038/d41586-020-00613-4
- 795 46. Brierley L. The role of research preprints in the academic response to the COVID-19 epidemic.  
796 2020. doi:10.22541/au.158516578.89167184
- 797 47. Vabret N, Samstein R, Fernandez N, Merad M. Advancing scientific knowledge in times of  
798 pandemics. *Nat Rev Immunol*. 2020; 1–1. doi:10.1038/s41577-020-0319-0
- 799 48. MIT Press. The MIT Press and UC Berkeley launch Rapid Reviews: COVID-19. In: *MIT News |*  
800 *Massachusetts Institute of Technology* [Internet]. 29 Jun 2020 [cited 13 Sep 2020]. Available:  
801 <https://news.mit.edu/2020/mit-press-and-uc-berkeley-launch-rapid-reviews-covid-19-0629>
- 802 49. Carneiro CFD, Queiroz VGS, Moulin TC, Carvalho CAM, Haas CB, Rayêe D, et al. Comparing  
803 quality of reporting between preprints and peer-reviewed articles in the biomedical literature.  
804 *Res Integr Peer Rev*. 2020;5: 16. doi:10.1186/s41073-020-00101-3
- 805 50. Wickham H, RStudio. *rvest: Easily Harvest (Scrape) Web Pages*. 2019. Available:  
806 <https://CRAN.R-project.org/package=rvest>
- 807 51. Abdill RJ, Adamowicz EM, Blekman R. International authorship and collaboration in bioRxiv  
808 preprints. *bioRxiv*. 2020; 2020.04.25.060756. doi:10.1101/2020.04.25.060756

- 809 52. Chamberlain S, Zhu H, Jahn N, Boettiger C, Ram K. rcrossref: Client for Various “CrossRef”  
810 “APIs.” 2020. Available: <https://CRAN.R-project.org/package=rcrossref>
- 811 53. Fang Z, Costas R. Studying the accumulation velocity of altmetric data tracked by  
812 Altmetric.com. *Scientometrics*. 2020;123: 1077–1101. doi:10.1007/s11192-020-03405-9
- 813 54. Haustein S, Bowman TD, Costas R. When is an article actually published? An analysis of online  
814 availability, publication, and indexation dates. *ArXiv150500796 Cs*. 2015 [cited 22 Jan 2021].  
815 Available: <http://arxiv.org/abs/1505.00796>
- 816 55. Jahn N, rOpenSci TS (Tuija S reviewed the package for,  
817 <https://github.com/ropensci/onboarding/issues/115>) see, rOpenSci RM (Ross M reviewed the  
818 package for, <https://github.com/ropensci/onboarding/issues/115>) see. roadoi: Find Free  
819 Versions of Scholarly Publications via Unpaywall. 2019. Available: [https://CRAN.R-](https://CRAN.R-project.org/package=roadoi)  
820 [project.org/package=roadoi](https://CRAN.R-project.org/package=roadoi)
- 821 56. Kearney M. rtweet: Collecting and analyzing Twitter data. *J Open Source Softw*. 2019;4: 1829.  
822 doi:10.21105/joss.01829
- 823 57. Steve Royle. Screenager: screening times at bioRxiv. In: *quantixed* [Internet]. 30 Mar 2020  
824 [cited 22 May 2020]. Available: [https://quantixed.org/2020/03/30/screenager-screening-](https://quantixed.org/2020/03/30/screenager-screening-times-at-biorxiv/)  
825 [times-at-biorxiv/](https://quantixed.org/2020/03/30/screenager-screening-times-at-biorxiv/)
- 826 58. Venables WN, Ripley BD. *Modern Applied Statistics with S*. 4th ed. New York: Springer-Verlag;  
827 2002. doi:10.1007/978-0-387-21706-2
- 828
- 829
- 830

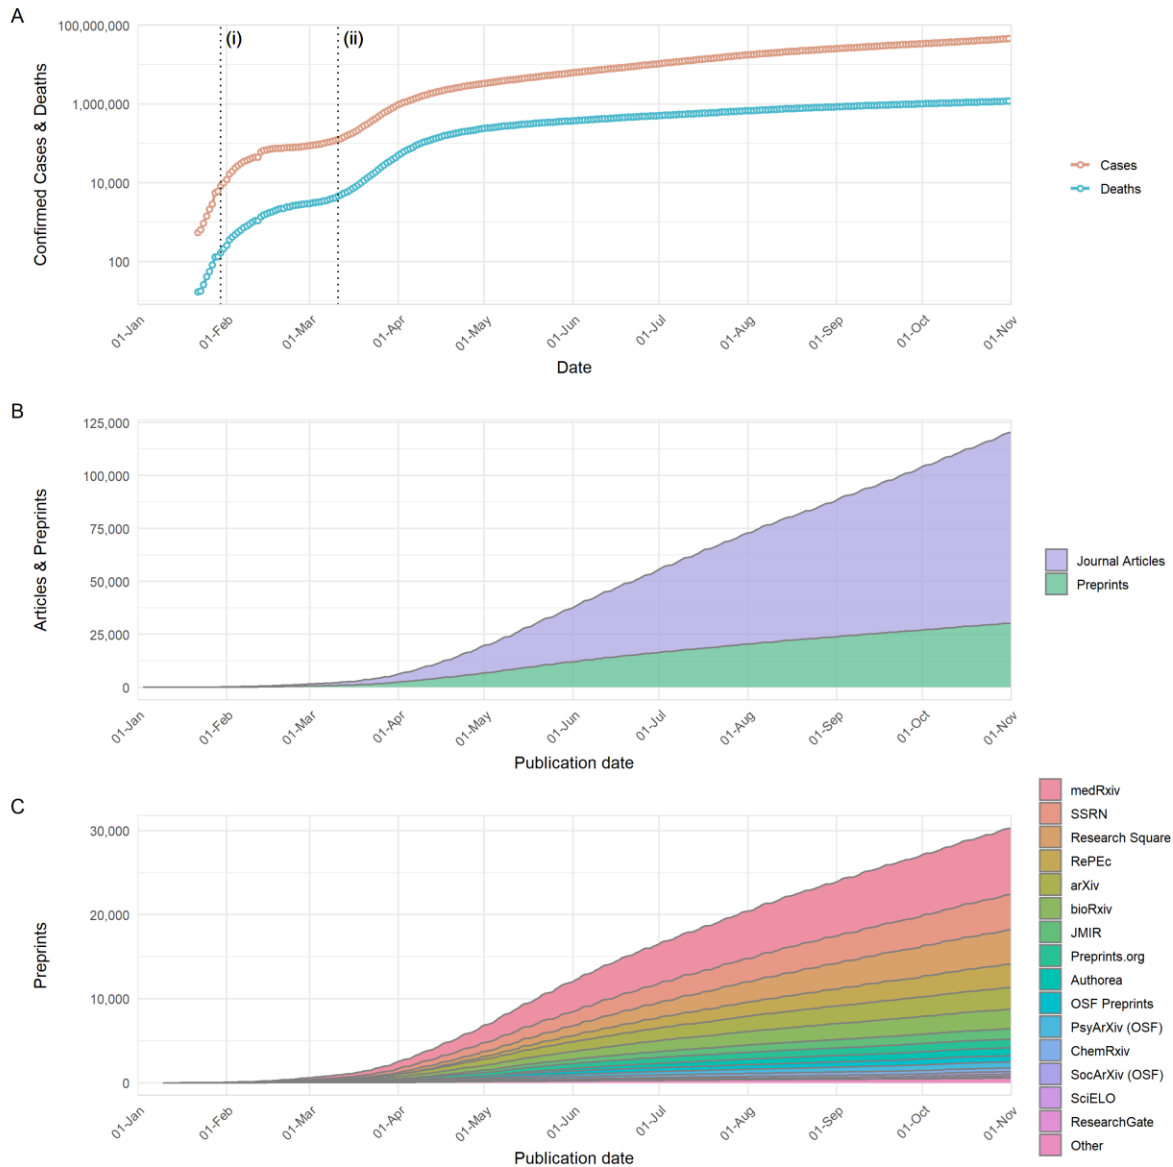

831

832 **Figure 1. Development of COVID-19 and publication response from 1<sup>st</sup> January to 31<sup>st</sup> October**  
833 **2020.** (A) Number of COVID-19 confirmed cases and reported deaths. Data is sourced from  
834 <https://github.com/datasets/covid-19/>, based on case and death data aggregated by the Johns  
835 Hopkins University Center for Systems Science and Engineering (<https://systems.jhu.edu/>). Vertical  
836 lines labelled (i) and (ii) refer to the date on which the World Health Organisation (WHO) declared  
837 COVID-19 outbreak a Public Health Emergency of International Concern, and the date on which the  
838 WHO declared the COVID-19 outbreak to be a pandemic, respectively. (B) Cumulative growth of  
839 journal articles and preprints containing COVID-19 related search terms. (C) Cumulative growth of  
840 preprints containing COVID-19 related search terms, categorised by individual preprint servers.  
841 Journal article data in (B) is based upon data extracted from Dimensions  
842 (<https://www.dimensions.ai/>; see methods section for further details), preprint data in (B) and (C) is  
843 based upon data gathered by Fraser and Kramer (2020).

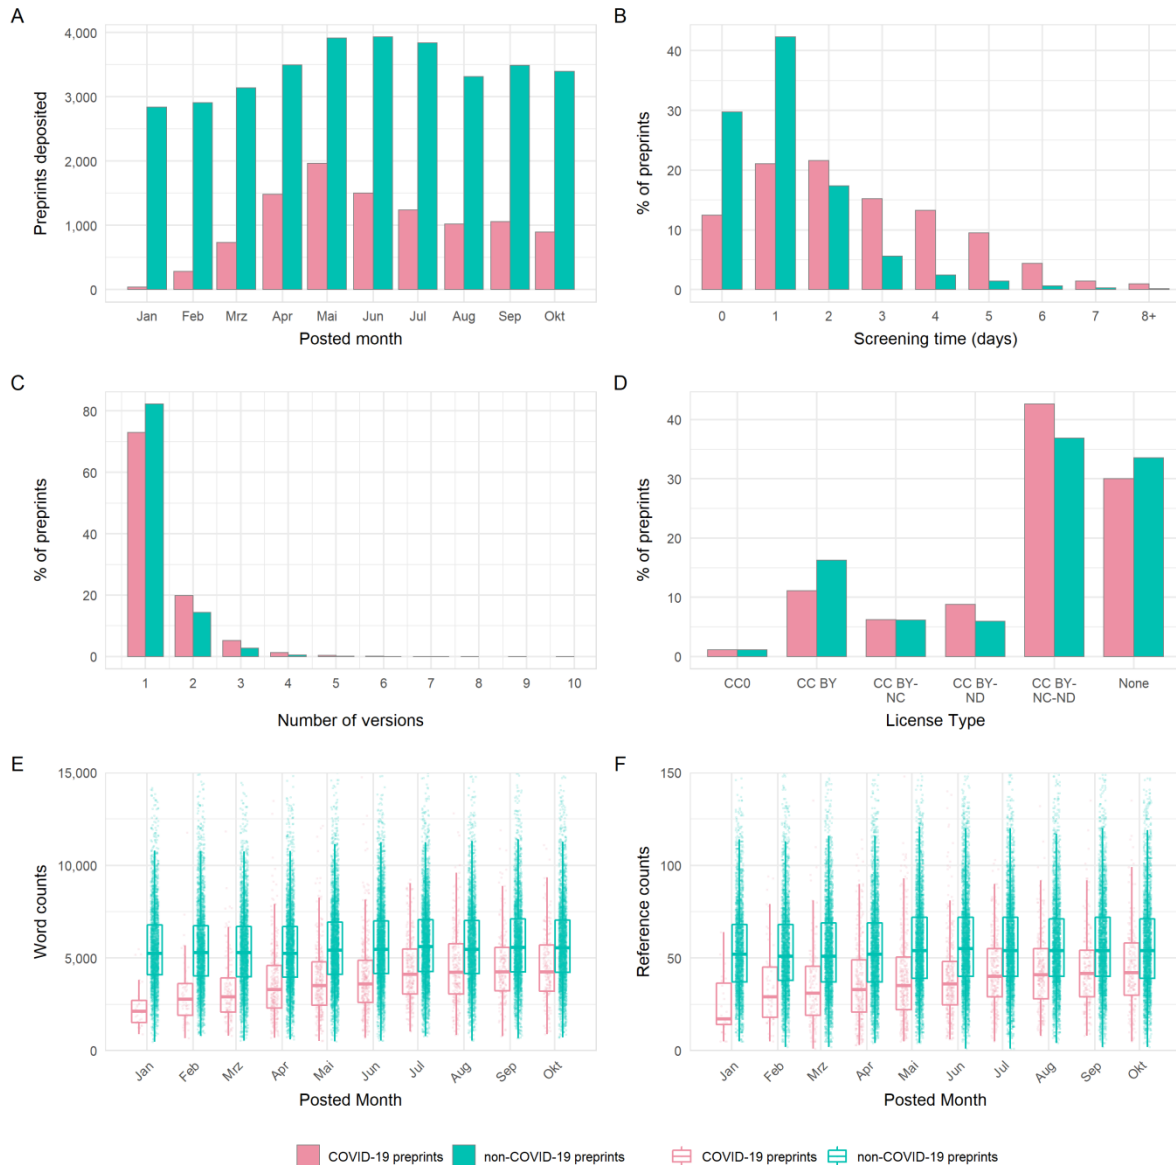

844

845 **Figure 2. Comparison of the properties of COVID-19 and non-COVID-19 preprints deposited on**  
846 **bioRxiv and medRxiv between 1<sup>st</sup> January and 31<sup>st</sup> October 2020.** (A) Number of new preprints  
847 deposited per month. (B) Preprint screening time in days. (C) License type chosen by authors. (D)  
848 Number of versions per preprint. (E) Boxplot of preprint word counts, binned by posting month. (F)  
849 Boxplot of preprint reference counts, binned by posting month. Boxplot horizontal lines denote  
850 lower quartile, median, upper quartile, with whiskers extending to 1.5\*IQR. All boxplots additionally  
851 show raw data values for individual preprints with added horizontal jitter for visibility.

852

853

854

855

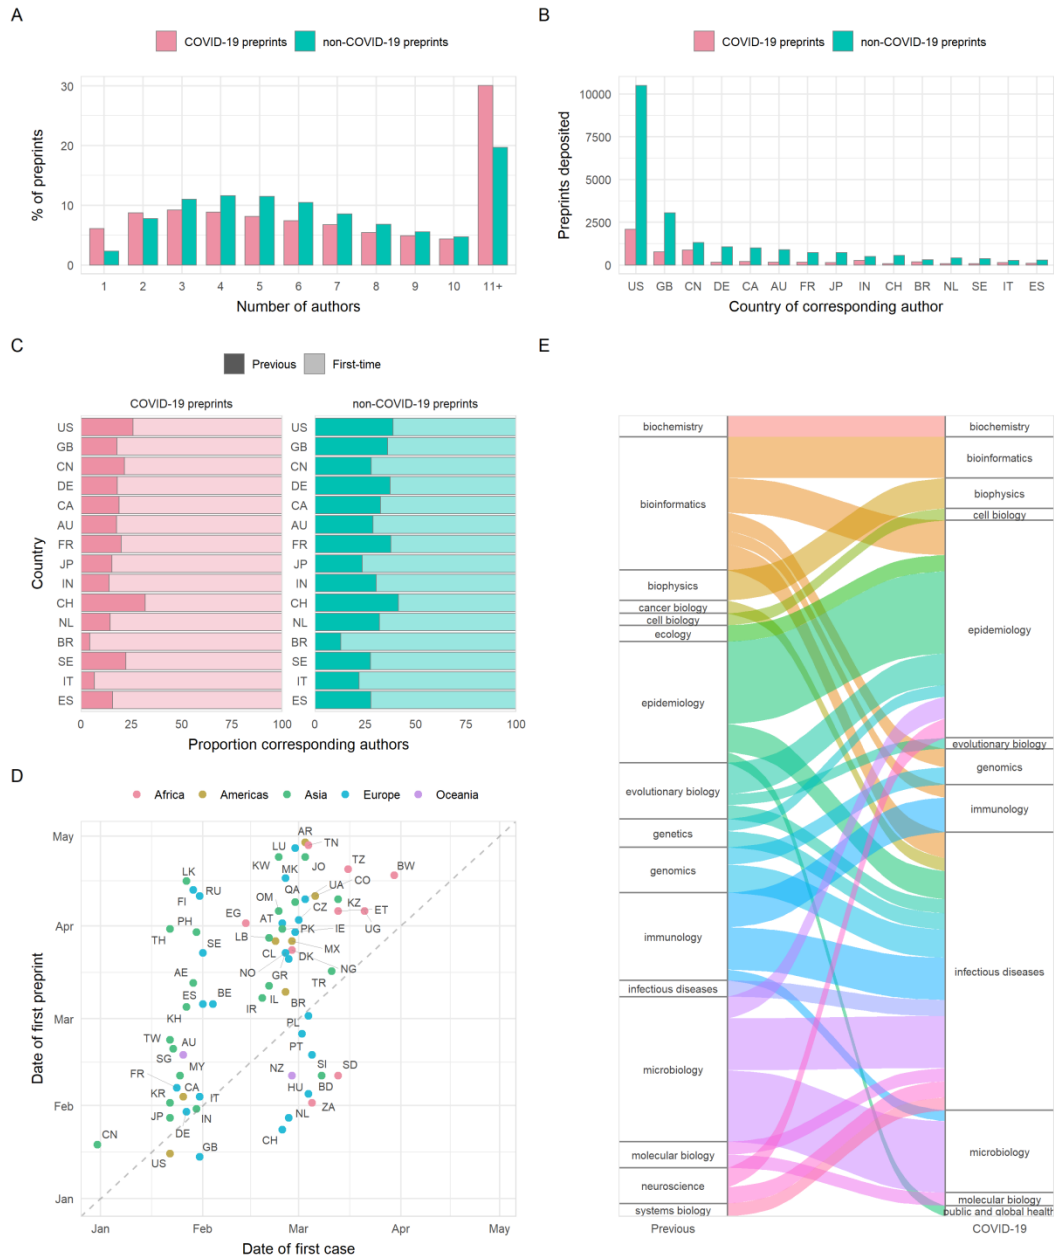

856

857 **Figure 3. Properties of authors of COVID-19 and non-COVID-19 preprints deposited on bioRxiv and**  
 858 **medRxiv between 1<sup>st</sup> January and 31<sup>st</sup> October 2020. (A) Number of authors per preprint. (B)**  
 859 **Number of preprints deposited per country of corresponding author (top-15 countries by total**  
 860 **preprint volume are shown). (C) Proportions of COVID-19 and non-COVID-19 corresponding authors**  
 861 **from each of the top-15 countries shown in (B) that had previously posted a preprint (darker bar) or**  
 862 **were posting a preprint for the first time (lighter bar). (D) Correlation between date of the first**  
 863 **preprint originating from a country (according to the affiliation of the corresponding author) and the**  
 864 **date of the first confirmed case from the same country for COVID-19 preprints. (E) Change in**  
 865 **bioRxiv/medRxiv preprint posting category for COVID-19 preprint authors compared to their**  
 866 **previous preprint (COVID-19 or non-COVID-19), for category combinations with n >= 5 authors. For**  
 867 **all panels containing country information, labels refer to ISO 3166 character codes.**

868



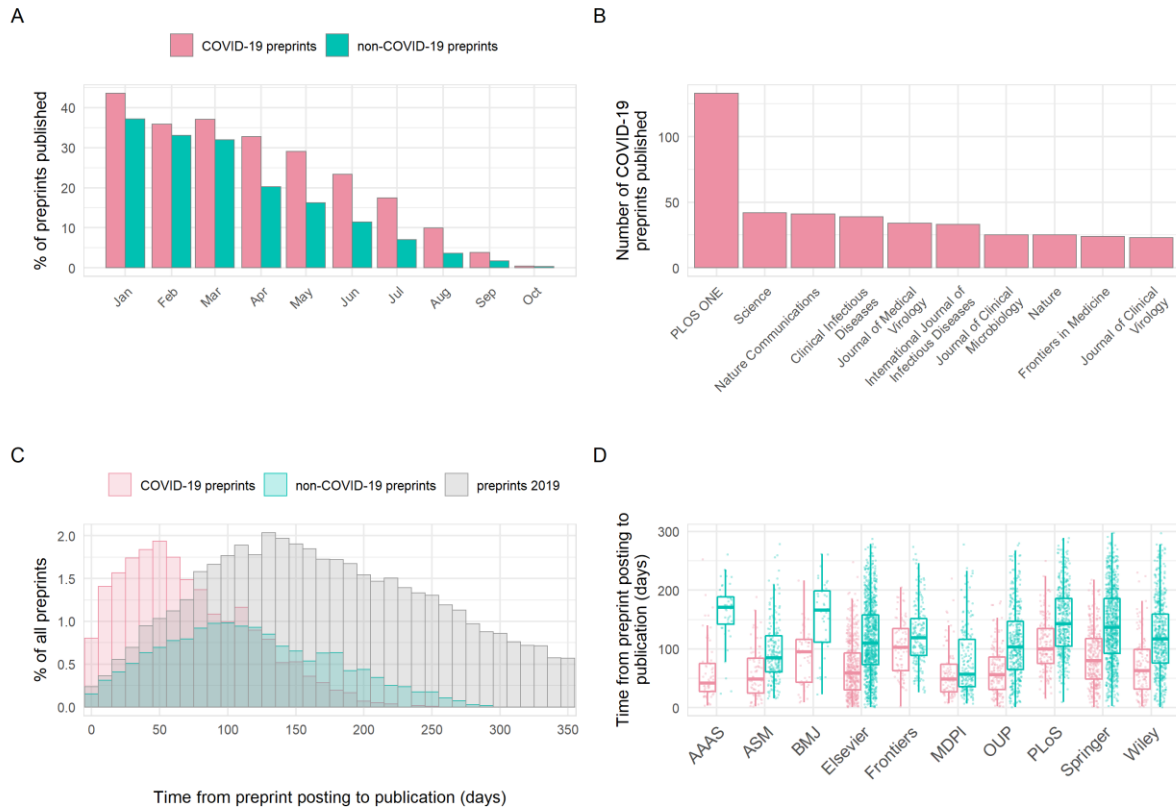

869

870 **Figure 4. Publication outcomes of COVID-19 and non-COVID-19 preprints deposited on bioRxiv and**  
871 **medRxiv between 1<sup>st</sup> January and 31<sup>st</sup> October 2020.** (A) Percentage of COVID-19 versus non-  
872 COVID-19 preprints published in peer-reviewed journals, by preprint posting month. (B) Destination  
873 journals for COVID-19 preprints that were published within our analysis period. Shown are the top-  
874 top 10 journals by publication volume. (C) Distribution of the number of days between posting a preprint  
875 and subsequent journal publication for COVID-19 preprints (red), non-COVID-19 preprints posted  
876 during the same period (January - October 2020) (green) and non-COVID-19 preprints posted  
877 between January – December 2019 (grey). (D) Time from posting on bioRxiv or medRxiv to  
878 publication categorised by publisher. Shown are the top-10 publishers by publication volume.  
879 Boxplot horizontal lines denote lower quartile, median, upper quartile, with whiskers extending to  
880 1.5\*IQR. All boxplots additionally show raw data values for individual preprints with added  
881 horizontal jitter for visibility.

882

883

884

885

886

887

888

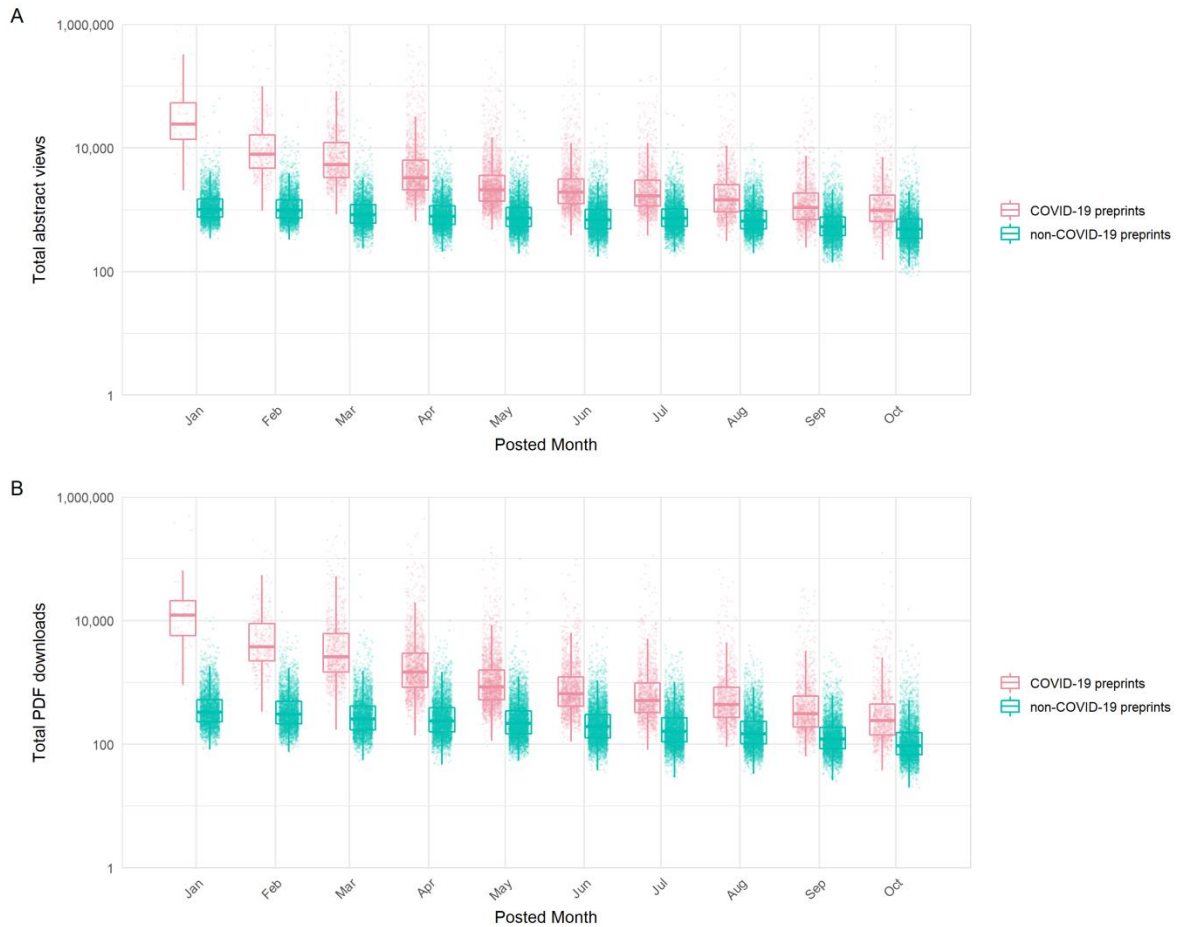

889

890 **Figure 5. Access statistics for COVID-19 and non-COVID-19 preprints posted on bioRxiv and**  
891 **medRxiv.** (A) Boxplots of abstract views, binned by preprint posting month. (B) Boxplots of PDF  
892 downloads, binned by preprint posting month. Boxplot horizontal lines denote lower quartile,  
893 median, upper quartile, with whiskers extending to 1.5\*IQR. All boxplots additionally show raw data  
894 values for individual preprints with added horizontal jitter for visibility.

895

896

897

898

899

900

901

902

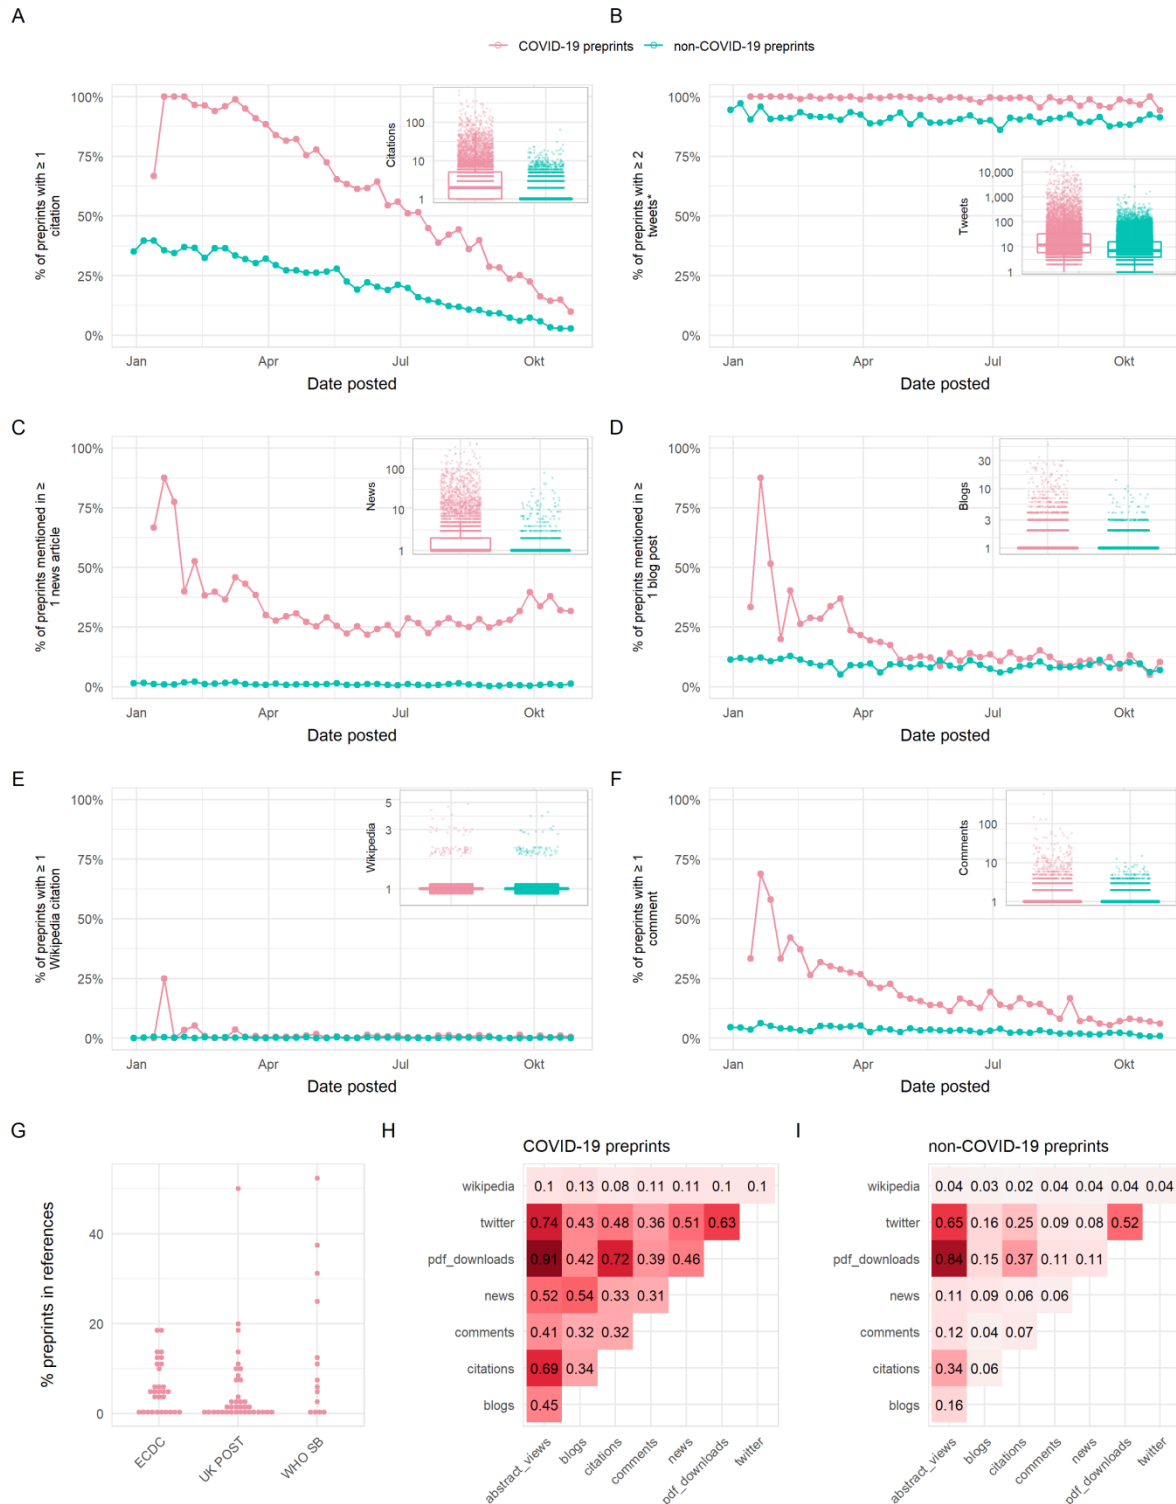

903

904 **Figure 6. Usage of COVID-19 and non-COVID-19 preprints posted on bioRxiv and medRxiv between**  
 905 **1<sup>st</sup> January and 31<sup>st</sup> October 2020.** Panels (A) – (F) show the proportion of preprints receiving at  
 906 least one citation or mention in a given source, with the exception of panel (B) which shows the  
 907 proportion of preprints receiving at least two tweets (to account for the fact that each preprint is  
 908 tweeted once automatically by the official bioRxiv/medRxiv twitter accounts). The inset in each  
 909 panel shows a boxplot comparing citations/mentions for all COVID-19 and non-COVID-19 preprints

910 posted within our analysis period. Boxplot horizontal lines denote lower quartile, median, upper  
911 quartile, with whiskers extending to  $1.5 \times \text{IQR}$ . All boxplots additionally show raw data values for  
912 individual preprints with added horizontal jitter for visibility. Data are plotted on a log-scale with +1  
913 added to each count for visualisation. (G) Proportion of preprints included in reference lists of policy  
914 documents from three sources: the European Centre for Disease Prevention and Control (ECDC), UK  
915 Parliamentary Office of Science and Technology (UK POST), and World Health Organisation Scientific  
916 Briefs (WHO SB). (H) Spearman's correlation matrix between indicators shown in panels (A) – (F), as  
917 well as abstract views and pdf downloads for COVID-19 preprints. (I) Spearman's correlation matrix  
918 between indicators shown in panels (A) – (F), in addition to abstract views and pdf downloads for  
919 non-COVID-19 preprints.  
920

Tables

**Table 1. Top 10 cited COVID-19 preprints**

| Rank | Source  | doi                         | Title                                                                                                                                        | Posted date | Citations |
|------|---------|-----------------------------|----------------------------------------------------------------------------------------------------------------------------------------------|-------------|-----------|
| 1    | medrxiv | 10.1101/2020.02.06.20020974 | Clinical characteristics of 2019 novel coronavirus infection in China                                                                        | 09/02/2020  | 652       |
| 2    | biorxiv | 10.1101/2020.02.07.937862   | Severe acute respiratory syndrome-related coronavirus - The species and its viruses, a statement of the Coronavirus Study Group              | 11/02/2020  | 513       |
| 3    | medrxiv | 10.1101/2020.01.23.20018549 | Novel coronavirus 2019-nCoV: early estimation of epidemiological parameters and epidemic predictions                                         | 24/01/2020  | 361       |
| 4    | biorxiv | 10.1101/2020.01.26.919985   | Single-cell RNA expression profiling of ACE2, the putative receptor of Wuhan 2019-nCov                                                       | 26/01/2020  | 359       |
| 5    | medrxiv | 10.1101/2020.03.22.20040758 | Efficacy of hydroxychloroquine in patients with COVID-19: results of a randomized clinical trial                                             | 30/03/2020  | 358       |
| 6    | biorxiv | 10.1101/2020.01.31.929042   | The novel coronavirus 2019 (2019-nCoV) uses the SARS-coronavirus receptor ACE2 and the cellular protease TMPRSS2 for entry into target cells | 31/01/2020  | 313       |
| 7    | biorxiv | 10.1101/2020.02.03.931766   | Specific ACE2 Expression in Cholangiocytes May Cause Liver Damage After 2019-nCoV Infection                                                  | 04/02/2020  | 304       |
| 8    | biorxiv | 10.1101/2020.01.22.914952   | Discovery of a novel coronavirus associated with the recent pneumonia outbreak in humans and its potential bat origin                        | 23/01/2020  | 302       |
| 9    | biorxiv | 10.1101/2020.01.30.927806   | The digestive system is a potential route of 2019-nCoV infection: a bioinformatics analysis based on single-cell transcriptomes              | 31/01/2020  | 285       |
| 10   | medrxiv | 10.1101/2020.02.11.20021493 | Laboratory diagnosis and monitoring the viral shedding of 2019-nCoV infections                                                               | 12/02/2020  | 277       |

**Table 2. Top 10 tweeted COVID-19 preprints**

| Rank | Source  | doi                         | Title                                                                                                                                       | Posted date | Tweets | News articles | Blogs |
|------|---------|-----------------------------|---------------------------------------------------------------------------------------------------------------------------------------------|-------------|--------|---------------|-------|
| 1    | medrxiv | 10.1101/2020.04.14.20062463 | COVID-19 Antibody Seroprevalence in Santa Clara County, California                                                                          | 17/04/20    | 26763  | 434           | 55    |
| 2    | medrxiv | 10.1101/2020.04.04.20053058 | Indoor transmission of SARS-CoV-2                                                                                                           | 07/04/20    | 21831  | 187           | 34    |
| 3    | medrxiv | 10.1101/2020.07.15.20151852 | Effect of Hydroxychloroquine in Hospitalized Patients with COVID-19: Preliminary results from a multi-centre, randomized, controlled trial. | 15/07/20    | 17534  | 83            | 5     |
| 4    | biorxiv | 10.1101/2020.01.30.927871   | Uncanny similarity of unique inserts in the 2019-nCoV spike protein to HIV-1 gp120 and Gag                                                  | 31/01/20    | 16608  | 102           | 25    |
| 5    | medrxiv | 10.1101/2020.05.19.20105999 | SARS-CoV-2 RNA concentrations in primary municipal sewage sludge as a leading indicator of COVID-19 outbreak dynamics                       | 22/05/20    | 16582  | 63            | 8     |
| 6    | medrxiv | 10.1101/2020.03.22.20040758 | Efficacy of hydroxychloroquine in patients with COVID-19: results of a randomized clinical trial                                            | 30/03/20    | 14614  | 106           | 18    |
| 7    | medrxiv | 10.1101/2020.10.14.20212555 | Multi-organ impairment in low-risk individuals with long COVID                                                                              | 16/10/20    | 12871  | 34            | 6     |
| 8    | medrxiv | 10.1101/2020.03.09.20033217 | Aerosol and surface stability of HCoV-19 (SARS-CoV-2) compared to SARS-CoV-1                                                                | 10/03/20    | 12484  | 354           | 29    |
| 9    | medrxiv | 10.1101/2020.08.03.20167395 | Viable SARS-CoV-2 in the air of a hospital room with COVID-19 patients                                                                      | 04/08/20    | 11770  | 121           | 8     |
| 10   | medrxiv | 10.1101/2020.03.30.20048165 | Association of BCG vaccination policy with prevalence and mortality of COVID-19                                                             | 06/04/20    | 10701  | 7             | 0     |

**Table 3. Top 10 COVID-19 preprints covered by news organisations**

| Rank | Source  | doi                         | Title                                                                                                                | Posted date | Tweets | News articles | Blogs |
|------|---------|-----------------------------|----------------------------------------------------------------------------------------------------------------------|-------------|--------|---------------|-------|
| 1    | biorxiv | 10.1101/2020.04.29.069054   | Spike mutation pipeline reveals the emergence of a more transmissible form of SARS-CoV-2                             | 30/04/2020  | 6848   | 449           | 29    |
| 2    | medrxiv | 10.1101/2020.04.14.20062463 | COVID-19 Antibody Seroprevalence in Santa Clara County, California                                                   | 17/04/2020  | 26763  | 434           | 55    |
| 3    | medrxiv | 10.1101/2020.04.16.20065920 | Outcomes of hydroxychloroquine usage in United States veterans hospitalized with Covid-19                            | 21/04/2020  | 10385  | 411           | 27    |
| 4    | medrxiv | 10.1101/2020.10.15.20209817 | Repurposed antiviral drugs for COVID-19; interim WHO SOLIDARITY trial results                                        | 15/10/2020  | 8569   | 396           | 25    |
| 5    | medrxiv | 10.1101/2020.03.09.20033217 | Aerosol and surface stability of HCoV-19 (SARS-CoV-2) compared to SARS-CoV-1                                         | 10/03/2020  | 12484  | 354           | 29    |
| 6    | medrxiv | 10.1101/2020.05.15.20103655 | Differential Effects of Intervention Timing on COVID-19 Spread in the United States                                  | 20/05/2020  | 1831   | 295           | 16    |
| 7    | medrxiv | 10.1101/2020.07.09.20148429 | Longitudinal evaluation and decline of antibody responses in SARS-CoV-2 infection                                    | 11/07/2020  | 2167   | 281           | 27    |
| 8    | medrxiv | 10.1101/2020.08.12.20169359 | Effect of Convalescent Plasma on Mortality among Hospitalized Patients with COVID-19: Initial Three-Month Experience | 12/08/2020  | 2746   | 264           | 26    |
| 9    | medrxiv | 10.1101/2020.06.22.20137273 | Effect of Dexamethasone in Hospitalized Patients with COVID-19: Preliminary Report                                   | 22/06/2020  | 5698   | 246           | 26    |
| 10   | medrxiv | 10.1101/2020.03.11.20031096 | Relationship between the ABO Blood Group and the COVID-19 Susceptibility                                             | 16/03/2020  | 4055   | 245           | 23    |



**Table 4. Top 10 commented on COVID-19 preprints**

| Rank | source  | doi                         | title                                                                                                                                                           | posted date | comments count |
|------|---------|-----------------------------|-----------------------------------------------------------------------------------------------------------------------------------------------------------------|-------------|----------------|
| 1    | medrxiv | 10.1101/2020.04.14.20062463 | COVID-19 Antibody Seroprevalence in Santa Clara County, California                                                                                              | 17/04/2020  | 582            |
| 2    | medrxiv | 10.1101/2020.03.24.20042937 | Correlation between universal BCG vaccination policy and reduced morbidity and mortality for COVID-19: an epidemiological study                                 | 28/03/2020  | 149            |
| 3    | biorxiv | 10.1101/2020.01.30.927871   | Uncanny similarity of unique inserts in the 2019-nCoV spike protein to HIV-1 gp120 and Gag                                                                      | 31/01/2020  | 129            |
| 4    | medrxiv | 10.1101/2020.04.16.20065920 | Outcomes of hydroxychloroquine usage in United States veterans hospitalized with Covid-19                                                                       | 21/04/2020  | 129            |
| 5    | biorxiv | 10.1101/2020.04.29.069054   | Spike mutation pipeline reveals the emergence of a more transmissible form of SARS-CoV-2                                                                        | 30/04/2020  | 75             |
| 6    | medrxiv | 10.1101/2020.03.11.20031096 | Relationship between the ABO Blood Group and the COVID-19 Susceptibility                                                                                        | 16/03/2020  | 72             |
| 7    | medrxiv | 10.1101/2020.03.27.20043752 | Forecasting COVID-19 impact on hospital bed-days, ICU-days, ventilator-days and deaths by US state in the next 4 months                                         | 30/03/2020  | 61             |
| 8    | medrxiv | 10.1101/2020.03.22.20040758 | Efficacy of hydroxychloroquine in patients with COVID-19: results of a randomized clinical trial                                                                | 30/03/2020  | 58             |
| 9    | medrxiv | 10.1101/2020.04.16.20067835 | Saliva is more sensitive for SARS-CoV-2 detection in COVID-19 patients than nasopharyngeal swabs                                                                | 22/04/2020  | 56             |
| 10   | medrxiv | 10.1101/2020.04.05.20054361 | Population-level COVID-19 mortality risk for non-elderly individuals overall and for non-elderly individuals without underlying diseases in pandemic epicenters | 08/04/2020  | 53             |

**Table 5. Top 10 most blogged COVID-19 preprints**

| Rank | Source  | doi                         | Title                                                                                                                | Posted date | Tweets | News articles | Blogs |
|------|---------|-----------------------------|----------------------------------------------------------------------------------------------------------------------|-------------|--------|---------------|-------|
| 1    | medrxiv | 10.1101/2020.04.14.20062463 | COVID-19 Antibody Seroprevalence in Santa Clara County, California                                                   | 17/04/2020  | 26763  | 434           | 55    |
| 2    | medrxiv | 10.1101/2020.04.04.20053058 | Indoor transmission of SARS-CoV-2                                                                                    | 07/04/2020  | 21831  | 187           | 34    |
| 3    | biorxiv | 10.1101/2020.04.29.069054   | Spike mutation pipeline reveals the emergence of a more transmissible form of SARS-CoV-2                             | 30/04/2020  | 6848   | 449           | 29    |
| 4    | medrxiv | 10.1101/2020.03.09.20033217 | Aerosol and surface stability of HCoV-19 (SARS-CoV-2) compared to SARS-CoV-1                                         | 10/03/2020  | 12484  | 354           | 29    |
| 5    | medrxiv | 10.1101/2020.04.16.20065920 | Outcomes of hydroxychloroquine usage in United States veterans hospitalized with Covid-19                            | 21/04/2020  | 10385  | 411           | 27    |
| 6    | medrxiv | 10.1101/2020.07.09.20148429 | Longitudinal evaluation and decline of antibody responses in SARS-CoV-2 infection                                    | 11/07/2020  | 2167   | 281           | 27    |
| 7    | medrxiv | 10.1101/2020.06.22.20137273 | Effect of Dexamethasone in Hospitalized Patients with COVID-19: Preliminary Report                                   | 22/06/2020  | 5698   | 246           | 26    |
| 8    | medrxiv | 10.1101/2020.08.12.20169359 | Effect of Convalescent Plasma on Mortality among Hospitalized Patients with COVID-19: Initial Three-Month Experience | 12/08/2020  | 2746   | 264           | 26    |
| 9    | biorxiv | 10.1101/2020.01.30.927871   | Uncanny similarity of unique inserts in the 2019-nCoV spike protein to HIV-1 gp120 and Gag                           | 31/01/2020  | 16608  | 102           | 25    |
| 10   | biorxiv | 10.1101/2020.03.30.015347   | Susceptibility of ferrets, cats, dogs, and different domestic animals to SARS-coronavirus-2                          | 31/03/2020  | 4168   | 209           | 25    |
| 11   | medrxiv | 10.1101/2020.10.15.20209817 | Repurposed antiviral drugs for COVID-19; interim WHO SOLIDARITY trial results                                        | 15/10/2020  | 8569   | 396           | 25    |

## Supporting information

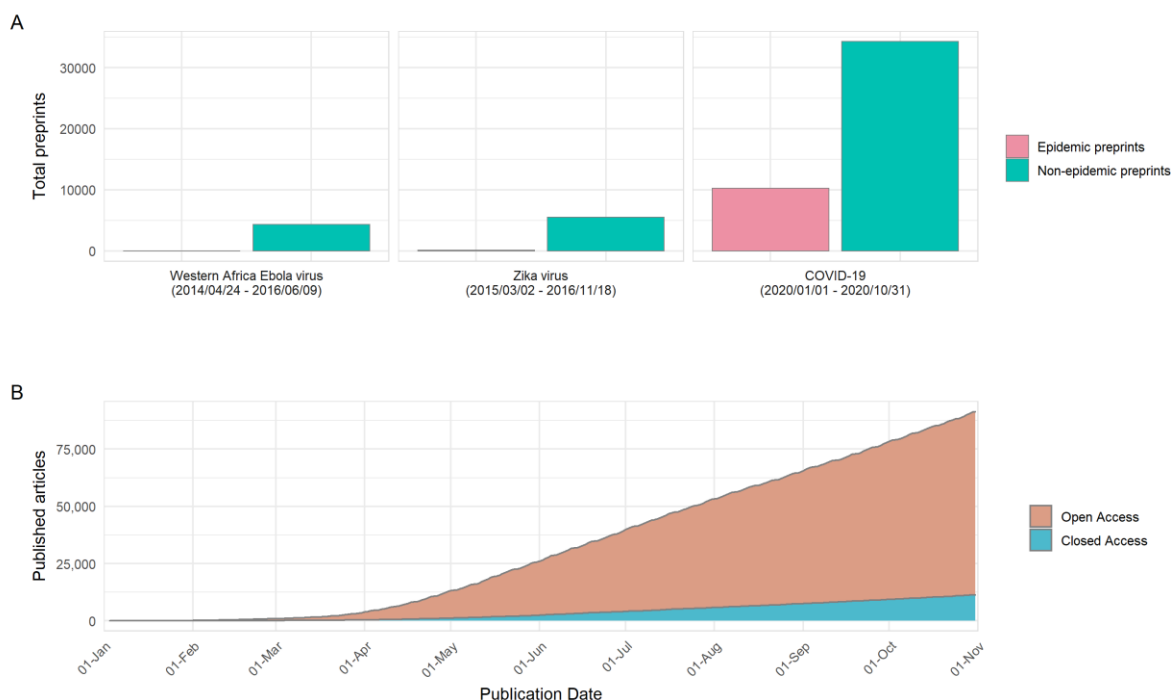

**Supplemental Figure 1. Preprints represent a higher proportion of the pandemic-related literature for COVID-19 than previous pandemics and most articles are open access.** (A) Total number of preprints posted on bioRxiv and medRxiv during multiple epidemics: Western Africa Ebola virus, Zika virus and COVID-19. The number of preprints posted that were related to the epidemic, and the number that were posted but not related to the epidemic in the same time period are shown. Periods of data collection for Western Africa Ebola virus (24th January 2014 - 9th June 2016) and Zika virus (2nd March 2015 - 18th November 2016) correspond to the periods between the first official medical report, and World Health Organization end of Public Health Emergency of International Concern declaration. The period of data collection for COVID-19 refers to the analysis period used in this study, 1st January 2020 to 31st October 2020. (B) Comparison of COVID-19 journal article accessibility (open vs closed access) according to data provided by Unpaywall (<https://unpaywall.org>).

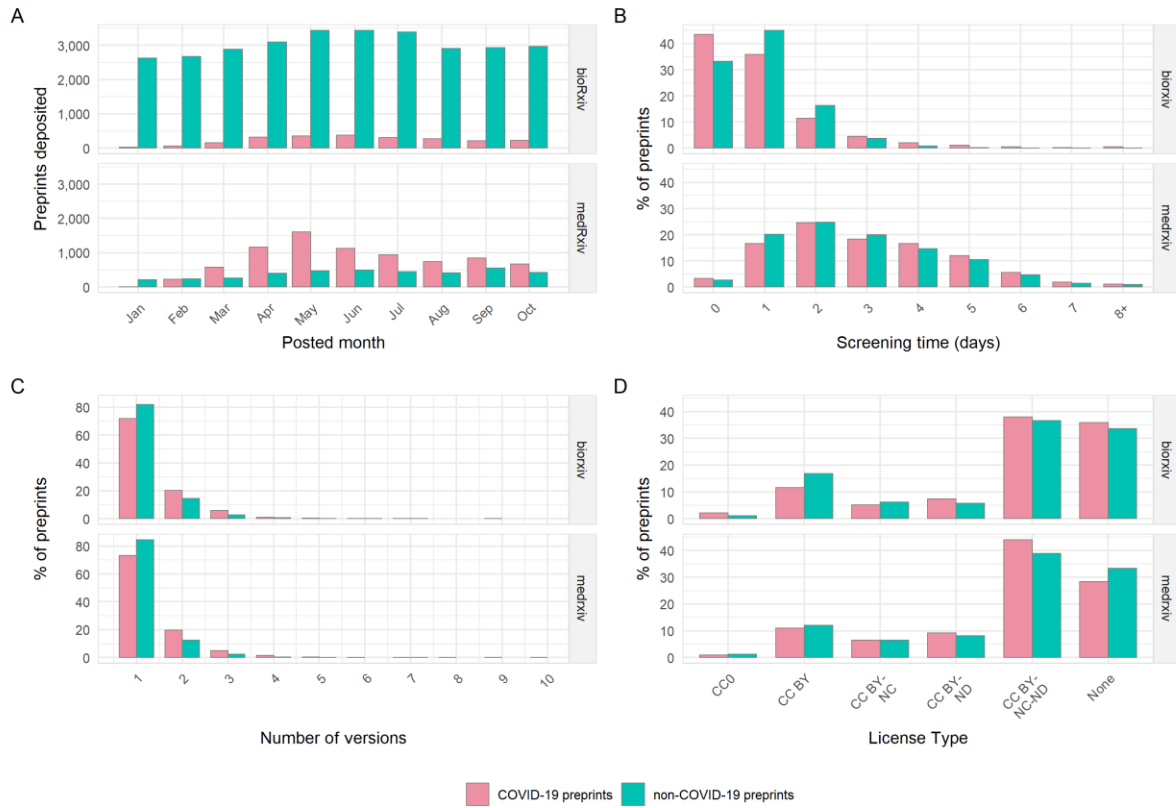

**Supplemental Figure 2. Properties of COVID-19 and non-COVID-19 preprints categorised by preprint server.** (A) Number of new preprints posted to bioRxiv versus medRxiv per month. (B) Preprint screening time in days for bioRxiv versus medRxiv. (C) Number of preprint versions posted to bioRxiv versus medRxiv. (D) License type chosen by authors for bioRxiv versus medRxiv.

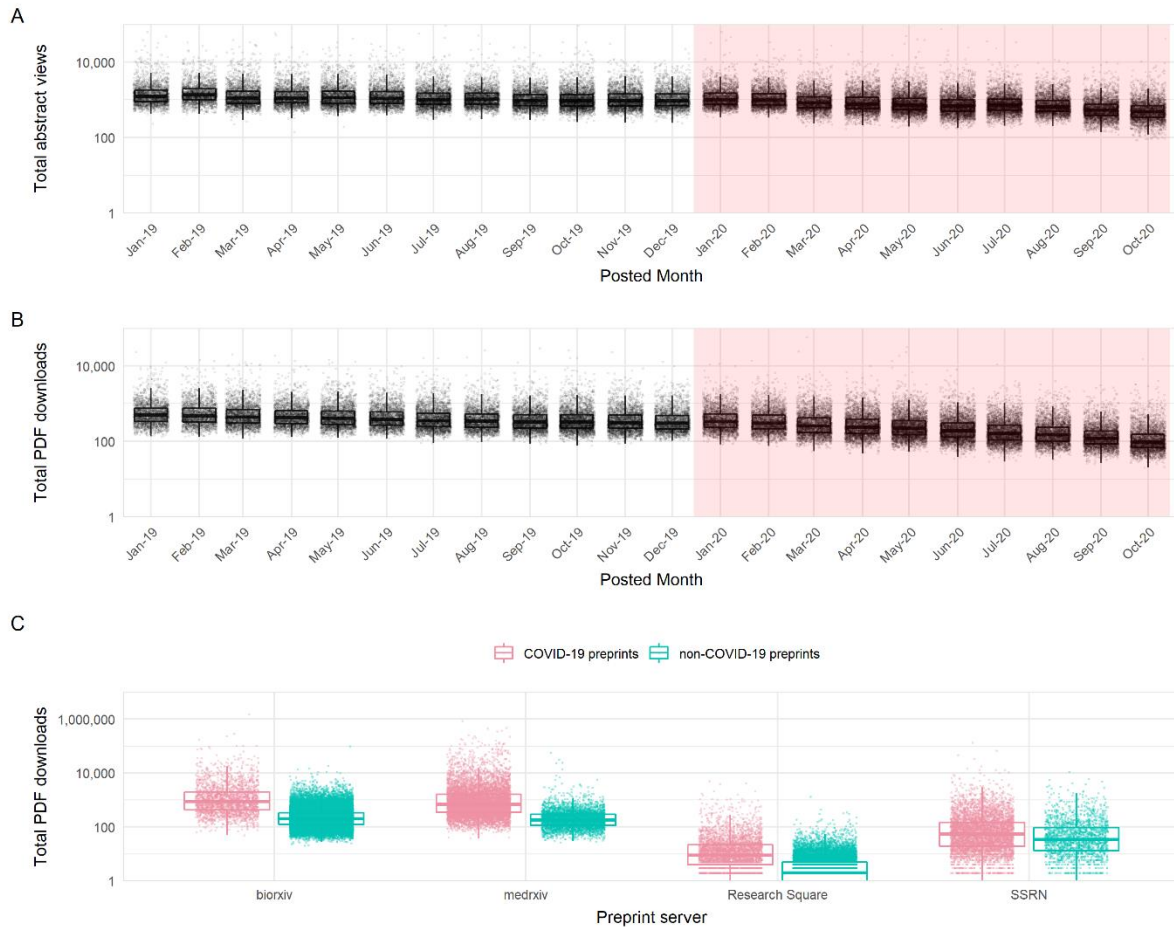

**Supplemental Figure 3. Access statistics for non-COVID preprints posted to bioRxiv and medRxiv between January 2019 and October 2020.** (A) Boxplots of abstract views, binned by preprint posting month (B) Boxplots of PDF downloads, binned by preprint posting month. (C) Comparison of PDF downloads for COVID-19 and non-COVID-19 preprints across multiple preprint servers. Red shaded area in (A) and (B) represent our analysis time period, concurrent with the COVID-19 pandemic. Boxplot horizontal lines denote lower quartile, median, upper quartile, with whiskers extending to  $1.5 \times \text{IQR}$ . All boxplots additionally show raw data values for individual preprints with added horizontal jitter for visibility.
