# 1 Preprinting a pandemic: the role of 2 preprints in the COVID-19 pandemic

3

4 Nicholas Fraser<sup>1,#</sup>, Liam Brierley<sup>2,#</sup>, Gautam Dey<sup>3</sup>, Jessica K Polka<sup>4</sup>, Máté Pálffy<sup>5</sup> & Jonathon Alexis  
5 Coates<sup>6,\*</sup>

6

7

8

9 <sup>1</sup> Leibniz Information Centre for Economics, Düsternbrooker Weg 120, 24105 Kiel, Germany

10 <sup>2</sup> Department of Health Data Science, University of Liverpool, Brownlow Street, Liverpool, L69 3GL,  
11 UK

12 <sup>3</sup> MRC Lab for Molecular Cell Biology, UCL, Gower Street, London WC1E 6BT, UK

13 <sup>4</sup> ASAPbio, 600-16th St Ste N312E MC2200, San Francisco, CA 94143-2517 San Francisco, CA, USA

14 <sup>5</sup> The Company of Biologists, Bidder Building, Station Road, Histon, Cambridge CB24 9LF, UK

15 <sup>6</sup> Hughes Hall College, University of Cambridge, Wollaston Rd, Cambridge, CB1 2EW, UK

16

17

18

19 # These authors contributed equally to this work

20 \* Correspondence: [jc2216@cam.ac.uk](mailto:jc2216@cam.ac.uk)

21

22 Short title: The role of preprints in the 2020 COVID-19 pandemic

23

24

25 [Abstract](#)

26 The world continues to face an ongoing viral pandemic that presents a serious threat to human  
27 health. The virus underlying the COVID-19 disease, SARS-CoV-2, has caused over 3.2 million confirmed  
28 cases and 220,000 deaths between January and April 2020. Although the last pandemic of respiratory  
29 disease of viral origin swept the globe only a decade ago, the way science operates and responds to  
30 current events has experienced a paradigm shift in the interim. The scientific community has  
31 responded rapidly to the COVID-19 pandemic, releasing over 16,000 COVID-19 related scientific  
32 articles within 4 months of the first confirmed case, of which at least 6,000 were hosted by preprint  
33 servers. We focused our analysis on bioRxiv and medRxiv, two growing preprint servers for biomedical  
34 research, investigating the attributes of COVID-19 preprints, their access and usage rates,  
35 characteristics of their sharing on online platforms, and the relationship between preprints and their  
36 published articles. Our data provides evidence for increased scientific and public engagement (COVID-  
37 19 preprints are accessed and distributed at least 15 times more than non-COVID-19 preprints) and  
38 changes in journalistic practice with reference to preprints. We also find evidence for changes in  
39 preprinting and publishing behaviour: COVID-19 preprints are shorter, with fewer panels and tables,  
40 and reviewed faster. Our results highlight the unprecedented role of preprints and preprint servers in  
41 the dissemination of COVID-19 science, and the likely long-term impact of the pandemic on the  
42 scientific publishing landscape.

43

44

45

46

47

48

49

50

51

52

53

## 54 Introduction

55 The first quarter of 2020 has been defined by the COVID-19 outbreak, which has escalated to  
56 pandemic status, and caused over 3.2 million cases and 220,000 deaths within 4 months of the first  
57 reported case [1,2]. The causative pathogen was rapidly identified as a novel virus within the family  
58 *Coronaviridae* and was named severe acute respiratory syndrome coronavirus 2 (or ‘SARS-CoV-2’) [3].  
59 Although multiple coronaviruses are ubiquitous among humans and cause only mild disease,  
60 epidemics of newly emerging coronaviruses were previously observed in SARS coronavirus in 2002 [4]  
61 and Middle East respiratory syndrome (MERS) coronavirus in 2012 [5]. The unprecedented extent and  
62 rate of spread of COVID-19 has created a critical global health emergency and academic communities  
63 have raced to actively respond through research developments.

64 Research developments have traditionally been communicated via published journal articles or  
65 conference presentations. Traditional scientific publishing involves the submission of manuscripts to  
66 an individual journal, which then organises peer review. Authors often conduct additional experiments  
67 or analyses to address the reviewers’ concerns in one or more revisions. Even after this lengthy  
68 process is concluded, almost half of submissions are rejected and require re-submission to a different  
69 journal [6]. The median time between the date a preprint is posted and the date at which the first DOI  
70 of a journal article is registered is 166 days [7]. Escalating demands made by reviewers and editors are  
71 lengthening the publication process still further [8,9].

72 Further compounding the issues with traditional publishing, public funds are often used to conduct  
73 research, pay direct publication costs and then pay once again for institutional subscriptions. Lack of  
74 access to research articles due to these “paywalls” has a disproportionately negative effect on  
75 scientific participation in developing countries [10]. Recent years have seen concerted efforts to  
76 reduce paywalls as a barrier to scientific advances, the most prominent example being the Plan S  
77 initiative (<https://www.coalition-s.org/>) which requires researchers supported by a large number of  
78 national and international funding agencies to publish all of their work in open repositories or open  
79 access journals by 2021. However, more than half of the newly-published global scientific literature  
80 remains behind journal paywalls [11].

81 Preprints are publicly-accessible scientific manuscripts that have not yet been certified by peer review  
82 [12]. While experiments with preprints date back to the 1960s [13], the physics and mathematics  
83 communities have been sharing papers on arXiv, a preprint server launched in 1991 [14]. Initial efforts  
84 to launch preprint servers in the life sciences were met with challenges, such as opposition from  
85 traditional publishers and little interest from biologists [12,15,16]. However, in 2013 two new preprint  
86 initiatives launched: PeerJ Preprints, from the publisher PeerJ, and bioRxiv, from Cold Spring Harbor

87 Labs. The latter established partnerships with journals that enabled simultaneous preprint posting at  
88 the time of submission [17]. More recently, CSHL, in collaboration with Yale and BMJ, launched  
89 medRxiv, a server for the medical sciences [15]. Preprint platforms have subsequently flourished, with  
90 two-thirds of preprints eventually being published in peer-reviewed journals [7].

91 While funders and institutions explicitly encouraged pre-publication data sharing in the context of the  
92 recent Zika and Ebola outbreaks [18], usage of preprints remained modest through these epidemics  
93 [19]. The COVID-19 crisis represents the first time that preprints have been widely used to  
94 communicate during an epidemic.

95 We assessed the role of preprints in the current COVID-19 pandemic between January 1<sup>st</sup> and April  
96 30<sup>th</sup>, determining how preprint servers are being used, how preprints are being disseminated and how  
97 they change in their published versions. We found that preprint servers hosted a large amount of  
98 COVID-19 related science, that this was being accessed and downloaded in far greater volume than  
99 other preprints on the same servers and that this was widely shared across multiple online platforms.  
100 Moreover, we determined that COVID-19 preprints are shorter and are reviewed faster. Taken  
101 together, our data demonstrates the importance of rapidly and openly sharing science in the context  
102 of a global pandemic and the essential role of preprints in this endeavour.

103

## 104 Results

### 105 COVID-19 preprints were posted early in the pandemic

106 The COVID-19 pandemic has rapidly spread across the globe, from 3 patients in the city of Wuhan on  
107 the 27<sup>th</sup> December 2019 to over 3.2 million confirmed cases worldwide by the end of April 2020 (Fig.  
108 1A). Following the declaration of COVID-19 as a pandemic by the WHO on 11<sup>th</sup> March [20], the number  
109 of cases grew exponentially in March, despite interventions by governments [21]. The scientific  
110 community responded rapidly as COVID-19 emerged as a serious threat, with publications appearing  
111 within weeks of the first reported cases (Fig. 1B, data from [22]). By the end of January 2020, 166  
112 scientific articles related to COVID-19 had been published in either a peer-reviewed journal or on a  
113 preprint server. When compared to other recent outbreaks of global significance caused by emerging  
114 RNA viruses, the response to COVID-19 has been much more rapid. In the first 4 months of the COVID-  
115 19 outbreak, 2,527 preprints were posted to bioRxiv and medRxiv alone; in comparison, only 78 Zika  
116 virus, and 10 Western Africa Ebola virus preprints were posted to bioRxiv and medRxiv during the  
117 respective time periods in which the outbreaks occurred. This surge in COVID-19 preprints is not  
118 explained by general increases in preprint server usage as the proportion of epidemic-related

119 preprints was significantly greater for COVID-19 (Chi-square;  $\chi^2 = 1641.6$ ,  $df = 2$ ,  $p < 0.001$ )  
120 (Supplemental Fig. 1A).

121 By the end of March, at least 5000 scientific articles were published relating to COVID-19; by the end  
122 of April this number had tripled to more than 16,000. A large proportion of these articles (>6000) were  
123 manuscripts hosted on preprint servers (Fig. 1B). Despite being one of the newest preprint servers,  
124 medRxiv hosted the largest number of preprints (~2000), whilst other preprint servers (with the  
125 exception of SSRN which hosts social sciences and humanities preprints) were each found to host  
126 <1000 preprints (Fig. 1C). Eleven of the 31 preprint servers included in our dataset hosted over 100  
127 COVID-19 related preprints each. It is important to note, however, that this preprint data is not  
128 exhaustive, and several preprint servers that may be expected to also host large amounts of COVID-  
129 19 research (e.g. RePEc, for economics research) are not included; the amount of research hosted by  
130 preprint servers is likely an underestimate of the true amount [22].

131 Following a steep increase in the posting of COVID-19 research, traditional publishers adapted new  
132 policies to support the ongoing public health emergency response efforts (Fig. 1D). Following multiple  
133 public calls from scientists [23], over 30 publishers agreed to make all COVID-19 work freely accessible  
134 by the 16<sup>th</sup> March [24,25]. Shortly after this, publishers (for example eLife [26]) began to alter peer-  
135 review policies in an attempt at fast-tracking COVID-19 research. Towards the end of April, OASPA  
136 issued an open letter of intent to maximise the efficacy of peer review [27]. The number of open-  
137 access COVID-19 journal articles suggests that journals have largely been successful with these new  
138 policies (Supplemental Fig. 1B).

### 139 [Attributes of COVID-19 preprints posted between January and April 2020](#)

140 Having observed that a large proportion of the scientific literature was hosted by multiple preprint  
141 servers (Fig. 1B), we focused our following investigation on two of the most popular preprint servers  
142 in the biomedical sciences: bioRxiv and medRxiv.

143 Between January and April 2020, 14,812 preprints were deposited between bioRxiv and medRxiv, of  
144 which the majority (12,285, 82.9%) were non-COVID-19 preprints (Fig. 2A). The numbers of non-  
145 COVID-19 related preprints deposited each week did not dramatically change over this period.  
146 However, the number of COVID-19 preprints posted per week increased, peaking at over 250 in the  
147 week beginning 6<sup>th</sup> April. The observed increase in COVID-19 preprints, did not seem to impact on the  
148 number of non-COVID-19 related preprints being posted within any given week (Fig. 2A). When the

149 data was broken down by server, it was evident that whilst posting of preprints to bioRxiv had  
150 remained relatively steady, preprints posted to medRxiv increased with time (Supplemental Fig. 2A).

151 This increase in posting poses challenges for the timely screening of preprints; we therefore analysed  
152 the screening times of bioRxiv and medRxiv over this period. Only marginally faster screening was  
153 detected for COVID-19 preprints than for non-COVID-19 preprints (Fig. 2B) when adjusting for  
154 differences between servers (two-way ANOVA, interaction term;  $F_{1,14808} = 69.13$ ,  $p < 0.001$ ). Whilst  
155 COVID-19 preprints were screened  $< 1$  day quicker from mean differences observed within both  
156 servers (Tukey HSD; both  $p < 0.001$ ), larger differences were observed between servers (Supplemental  
157 Fig. 2B), with bioRxiv screening preprints on approximately 2 days quicker than medRxiv for both  
158 preprint types (both  $p < 0.001$ ).

159 We next investigated the geographical distribution of preprint authors. Non-COVID-19 preprints most  
160 commonly featured a corresponding author (which we assumed to be senior author) based in the  
161 United States (US), with significant authorship also originating within the United Kingdom (GB) and  
162 China. Considering COVID-19 preprints, China instead had the most corresponding authors (almost  
163 20%), followed by the US and GB (Fig. 2C). We found that most countries posted their first COVID-19  
164 preprint near to the time of their first confirmed COVID-19 case (Fig. 2D), with weak positive  
165 correlation considering calendar days of both events (Spearman's rank;  $\rho = 0.39$ ,  $p = 0.001$ ). Countries  
166 posting a COVID-19 preprint in advance of their first confirmed case were mostly higher-income  
167 countries (e.g. US, GB, New Zealand, Switzerland). COVID-19 preprints were deposited from every  
168 inhabited continent, revealing the global response to the pandemic.

169 The number of authors may give an indication as to the amount of work, resources used, and the  
170 extent of collaboration in a paper. We therefore investigated the distribution of size of authorship  
171 teams across preprints. While the average number of authors of COVID-19 and non-COVID-19  
172 preprints did not differ, COVID-19 preprints showed slightly more variability in authorship team size  
173 (median, 6 [IQR 8] vs 6 [IQR 5]). Single-author preprints were almost three times more common among  
174 COVID-19 than non-COVID-19 preprints (Fig. 2E).

175 bioRxiv and medRxiv allow authors to select from a number of different Creative Commons  
176 (<https://creativecommons.org/>) license types when depositing their work: CC0 (No Rights Reserved),  
177 CC-BY (Attribution), CC BY-NC (Attribution, Non-Commercial), CC-BY-ND (Attribution, No-Derivatives),  
178 CC-BY-NC-ND (Attribution, Non-Commercial, No-Derivatives). Authors may also select to post their  
179 work without a license (i.e. All Rights Reserved). A previous analysis has found that bioRxiv authors  
180 tend to post preprints under the more restrictive license types [28], although there appears to be

181 some confusion amongst authors as to the exact meaning of each license type [29]. We assessed  
182 whether authors choose different license types when posting COVID-19 versus non-COVID-19  
183 preprints (Fig. 2F). Authors of COVID-19 preprints were more likely to choose CC-BY-NC-ND or CC-BY-  
184 ND than those of non-COVID-19 preprints, and less likely to choose CC-BY and CC (Fisher's exact, 1000  
185 simulations;  $p < 0.001$ ).

186 Preprint servers offer authors the opportunity to post new versions of a preprint, to improve upon or  
187 correct mistakes in an earlier version. Predominantly, preprints existed as only a single version for  
188 both COVID-19 or non-COVID-19 work with very few preprints existing beyond two versions (Fig. 2G).  
189 COVID-19 preprints did not discernibly differ in number of versions compared with non-COVID-19  
190 preprints (median, 1 [IQR 1] vs 1 [IQR 0]).

191 The speed with which COVID-19 preprints are being posted suggests that researchers have changed  
192 the way in which they share results. To investigate this, we compared the word counts of COVID-19  
193 preprints and non-COVID-19 preprints from bioRxiv. We found that COVID-19 preprints are indeed on  
194 average shorter in length than non-COVID-19 preprints (median, 3432 [IQR 2597] vs 6143 [IQR 3363];  
195 Mann-Whitney,  $p < 0.001$ ) (Fig. 2H). This supports anecdotal observations that preprints are being  
196 used to share more work-in-progress data than a complete story. We also found that COVID-19  
197 preprints contain fewer references than non-COVID-19 preprints, reflecting the new, emerging COVID-  
198 19 field (median, 30.5 [IQR 29] vs 51 [IQR 31];  $p < 0.001$ ) (Fig. 2I).

199

#### 200 Extensive access of preprint servers for COVID-19 research

201 Throughout our time window, COVID-19 preprints received abstract views at a rate over 15 times that  
202 of non-COVID-19 preprints (Fig. 3A) (time-adjusted negative binomial regression; odds ratio = 15.6,  $z$   
203 = 143.8,  $p < 0.001$ ). There was minimal change in total abstract views over time for COVID-19 and non-  
204 COVID-19 preprints, with each additional calendar week in posting date resulting in a 6.3% reduction  
205 in odds of views (odds ratio = 0.937,  $z = -44.56$ ,  $p < 0.001$ ), suggesting that most preprints receive the  
206 majority of views near the time of posting.

207 We found similar results when comparing the pdf downloads of COVID-19 and non-COVID-19  
208 preprints, with COVID-19 preprints receiving almost 30 times more downloads (Fig. 3B) (odds ratio =  
209 28.9,  $z = 155.1$ ,  $p < 0.001$ ). Again, there was negligible change in the rate of pdf downloads between  
210 posting times for all examined preprints, with each additional calendar week in posting date resulting  
211 in an 8.1% reduction in rate of downloads (odds ratio = 0.919,  $z = -51.07$ ,  $p < 0.001$ ). This further



212 suggested most preprints receive their heaviest usage near to time of posting, with the highest  
213 observed usage for COVID-19 preprints occurring on the week commencing 20<sup>th</sup> January.

214 To confirm that usage of COVID-19 and non-COVID-19 preprints was not an artefact of differing  
215 preprint server reliance during the pandemic, we compared usage to September 2019 – April 2020, as  
216 a non-pandemic control period. We observed a slight decrease in abstract views (Supplemental Fig.  
217 3A) and pdf downloads (Supplemental Fig. 3B) in March 2020, but otherwise, the usage data did not  
218 differ from that prior to the pandemic.

219 We investigated usage across additional preprint servers (data kindly provided by each of the servers).  
220 We found that COVID-19 preprints were consistently downloaded more than non-COVID-19 preprints  
221 during our timeframe, regardless of which preprint server hosted the science (Supplemental Fig. 3C),  
222 though the gap in downloads varied between server (two-way ANOVA, interaction term;  $F_{4,276544} =$   
223  $586.9$ ,  $p < 0.001$ ). Server usage differences were more pronounced for COVID-19 preprints; multiple  
224 post-hoc comparisons confirmed that bioRxiv and medRxiv received significantly higher usage per  
225 COVID-19 preprint than all other servers for which data was available (Tukey HSD; all  $p$  values  $< 0.001$ ).  
226 However, for non COVID-19 preprints, the only observed pairwise differences between servers  
227 indicated greater bioRxiv usage than SSRN or Research Square (Tukey HSD; all  $p$  values  $< 0.001$ ). This  
228 suggests specific attention has been given disproportionately to bioRxiv and medRxiv as repositories  
229 for COVID-19 research.

### 230 COVID-19 preprints were shared more widely than non-COVID-19 preprints

231 Based on citation data from Dimensions, we found that COVID-19 preprints are being cited much more  
232 often than non-COVID-19 preprints (time-adjusted negative binomial regression; odds ratio = 71.1,  $z$   
233 = 49.2,  $p < 0.001$ ) (Fig. 4A), although it should be noted that only a minority of preprints received at  
234 least one citation (30.6 % vs 5.5 %). We next investigated the ten highest cited COVID-19 preprints  
235 (Table 1). The highest cited preprint had 127 citations, with the 10<sup>th</sup> most cited COVID-19 preprint  
236 receiving 48 citations, with much of the highest cited preprints focus on the viral cell receptor,  
237 angiotensin converting enzyme 2 (ACE2) or the epidemiology of COVID-19.

238

239 Utilising data from Altmeteric, we also investigated sharing of preprints on Twitter to assess the  
240 exposure of wider public audiences to preprints. COVID-19 preprints were shared more often than  
241 non-COVID-19 preprints (odds ratio = 14.8,  $z = 91.55$ ,  $p < 0.001$ ) (Fig. 4B). The most tweeted non-  
242 COVID-19 preprint received 1,323 tweets, whereas 8 of the top 10 tweeted COVID-19 preprints were  
243 tweeted over 10,000 times each (Table 2). Many of the top 10 tweeted COVID-19 preprints were  
244 related to transmission, re-infection or seroprevalence and association with the BCG vaccine. The



245 most tweeted COVID-19 preprint (29,984 tweets) was a study investigating antibody seroprevalence  
246 in California [30], whilst the second most tweeted COVID-19 preprint was a widely criticised (and later  
247 withdrawn) study linking the SARS-CoV-2 spike protein to HIV-1 glycoproteins.

248

249 To better understand the main discussion topics associated with the top-10 most tweeted preprints,  
250 we analysed the hashtags used in original tweets (i.e. excluding retweets) mentioning those preprints  
251 (Supplemental Fig. 4A). After removing some highly inflated hashtags directly referring to the virus  
252 (e.g. “#coronavirus”, “#COVID-19”), we found that the most dominant hashtag among tweets  
253 referencing preprints was “#chloroquine”, a major controversial topic associated with two of the top  
254 ten most tweeted preprints. Other prominent hashtags contained a mixture of direct, neutral  
255 references to the disease outbreak such as “#coronavirusoutbreak” and “#Wuhan”, and some more  
256 politicised terms, such as “#fakenews” and “#covidisalie”, associated with conspiracy theories.

257

258 As well as featuring heavily on social media, COVID-19 research has also saturated print and online  
259 news media. We found that COVID-19 preprints had over two-hundred fold odds of being shared in  
260 news articles than non-COVID-19 preprints (odds ratio = 220.4,  $z = 39.27$ ,  $p < 0.001$ ), although as with  
261 citations, only a minority were mentioned in news articles at all (26.9% vs 6.7%) (Fig. 4C). The top non-  
262 COVID-19 preprints were reported in less than 100 news articles in total, whereas the top COVID-19  
263 preprints were reported in over 300 news articles (Table 3). Similarly, when we investigated the  
264 sharing of preprints across blogs, we found that COVID-19 preprints were shared more than non-  
265 COVID-19 preprints (odds ratio = 9.48,  $z = 29.2$ ,  $p < 0.001$ ) (Fig. 4D). We noted that several of the most  
266 widely-disseminated non-COVID-19 preprints featured generalised topics still relevant to infectious  
267 disease research, e.g. human respiratory physiology and personal protective equipment (Tables 2 and  
268 3).

269

270 We next investigated if there was a correlation between these different usage indicators (citations,  
271 tweets, news articles and blogs). In general, we observe much weaker correlation between all  
272 indicators for non-COVID-19 preprints compared to COVID-19 preprints (Fig. 4E and 4F). For COVID-  
273 19 preprints, we found weak correlation between the numbers of citations and Twitter shares  
274 (Spearman’s  $\rho = 0.37$ ,  $p < 0.001$ ), and the numbers of citations and news articles ( $\rho = 0.41$ ,  $p < 0.001$ )  
275 (Fig. 4E), suggesting that the preprints cited mostly within the scientific literature differed to those  
276 that were mostly shared by the wider public on other online platforms. There was a stronger  
277 correlation between COVID-19 preprints that were most blogged and those receiving the most  
278 attention in the news ( $\rho = 0.58$ ,  $p < 0.001$ ). Moreover, there was a strong correlation between COVID-

279 19 preprints that were most tweeted and those receiving the most attention in the news ( $p = 0.52$ ,  $p$   
280  $< 0.001$ ), suggesting similarity between preprints shared on social media and in news media (Fig. 4E).  
281 Indeed, of the top ten COVID-19 preprints that were tweeted or mentioned in news articles, five  
282 appeared in both lists (Supplemental Fig. 4B).

283

284 As the sentiment of tweet text content associated with each of the 10 most tweeted COVID-19  
285 preprints was scored to be generally positive (Supplemental Fig. 4C), we decided to examine topics  
286 associated with the most shared COVID-19 preprints. We analysed the hashtags used on twitter for 3  
287 of the preprints that were amongst the top ten most tweeted, top ten most mentioned in news articles  
288 and top ten most blogged (Tables 1-4; Supplemental Fig. 4D-I). Diverse topics appeared in the  
289 discussions following each individual preprint; the most tweeted preprint [30] was associated with  
290 hashtags such as “#endthelockdown”, “#drfauci” and “#billgates” (Supplemental Fig. 4D & E), whilst  
291 the fifth most tweeted article [31] was associated with hashtags related to prevention measures, for  
292 example, “flattenthecurve”, “#washyourhands” and “#socialdistancing” (Supplemental Fig. 4F & G). A  
293 preprint demonstrating a lack of efficacy of hydroxychloroquine [32] was dominated by the hashtag  
294 “#fakenews” and “#hydroxychloroquine” (Supplemental Fig. 4H & I).

295

296 Our data reveals that COVID-19 preprints received an unprecedented amount of attention from  
297 scientists, news organisations and the general public, representing a departure for how preprints are  
298 normally shared (considering observed patterns for non-COVID-19 preprints).

299

300 **Table 1. Top 10 cited COVID-19 preprints**

301 **Table 2. Top 10 tweeted COVID-19 preprints**

302 **Table 3. Top 10 COVID-19 preprints covered by news organisations**

303

304 [Publishing and peer review of preprints during the pandemic](#)

305 We have demonstrated that preprint servers are seeing unprecedented use in response to the COVID-  
306 19 pandemic (Figs. 1 & 2). Many traditional publishers adapted their policies in response to the  
307 pandemic to better facilitate the communication and sharing of COVID-19 research (Fig. 1D). Within  
308 our timeframe, 4% of COVID-19 preprints were published by April, a significant increase compared to  
309 the 3% of non-COVID preprints that were published ( $\chi^2 = 6.77$ ,  $df = 1$ ,  $p = 0.009$ ) (Fig. 5A). These  
310 published COVID-19 preprints were split across many journals, with clinical or multidisciplinary

311 journals tending to publish the most papers that were previously preprints (Supplemental Fig. 5A). To  
312 determine how publishers were prioritising COVID-19 research, we compared the time from preprint  
313 posting to publication in a journal. Delay from posting to subsequent publication was significantly  
314 accelerated for COVID-19 preprints by a mean difference of 25.7 days compared to non-COVID-19  
315 preprints posted in the same time period (two-way ANOVA;  $F_{1,289} = 69.8$ ,  $p < 0.001$ ). This did not appear  
316 driven by any temporal changes in publishing practices, as non-COVID preprints were similar to  
317 expectation of our control timeframe of September - January (Fig. 5B). COVID-19 preprints also  
318 appeared to have significantly accelerated publishing regardless of publisher (two-way ANOVA,  
319 interaction term;  $F_{6,283} = 0.41$ ,  $p = 0.876$ ) (Supplemental Fig. 5B).

320 As a response to the pandemic, many labs have shifted their focus to COVID-19 research, with much  
321 discussion over how appropriate this might be [33]. To quantify whether this was detectable within  
322 the preprint literature, for each corresponding author associated with a COVID-19 preprint we traced  
323 back their most recent previous preprint (COVID-19 or non-COVID-19) and compared the server-  
324 deposited categories of both. Most senior authors were not drastically changing fields, with category  
325 differences generally spanning reasonably related areas (for example, some authors previously  
326 posting preprints in evolutionary biology have posted COVID-19 preprints in microbiology) (Fig. 5C).  
327 This suggests that - at least within the life sciences - principal investigators are utilising their labs' skills  
328 and resources in a responsible manner in their contributions to COVID-19 research.

329 Independent COVID-19 review projects have arisen to publicly review COVID-19 preprints [34]. To  
330 determine the extent of non-journal-organised, public, peer-review we quantified the number of  
331 comments for preprints posted between January and April. We found that non-COVID-19 preprints  
332 were rarely commented upon, in comparison to COVID-19 preprints (time-adjusted negative binomial  
333 regression; odds ratio = 27.9,  $z = 32.0$ ,  $p < 0.001$ ) (Fig. 5D); the most commented non-COVID-19  
334 preprint received only 15 comments, whereas the most commented COVID-19 preprint had over 500  
335 comments on the 30<sup>th</sup> April (Table 4). One preprint, which had 127 comments was retracted within 3  
336 days of being posted following intense public scrutiny [35]. Comparing the sentiment score of the top  
337 10 most commented COVID-19 preprints revealed a broadly positive sentiment within the comments  
338 (Supplemental Fig. 5C). In contrast, an overwhelming majority of preprints that were subsequently  
339 published were not associated with transparent reviews (Supplemental Fig. 5D) and many had similar  
340 data availability to their preprint version (Supplemental Fig. 5E). Collectively these data suggest that  
341 the most discussed or controversial COVID-19 preprints are being rapidly and publicly scrutinised, with  
342 flawed preprints being either removed or updated.

343 Having established that public scrutiny was occurring for at least a portion of the COVID-19 preprints,  
344 we assessed the extent to which published COVID-19 articles that were previously preprints had  
345 changed during the publication process. We randomly sampled an equal number of published non-  
346 COVID-19 articles that were previously preprints to act as a control sample and then qualitatively and  
347 quantitatively scored preprint-paper pairs. Over 75% of preprints did not have any change in the  
348 author list, with 15.8% of COVID-19 preprints having authors added for publication compared to 6.06%  
349 of non-COVID preprints (Supplemental Fig. 5F). We assessed the difference between abstracts,  
350 classifying whether the published abstract had no change, a softening or strengthening of the wording,  
351 or a major change in the conclusions. We found that 61.3% of COVID-19 preprints did not have  
352 significantly altered abstracts following publication (Fig. 5E). However, 26.7% of the COVID-19  
353 abstracts did have altered wording or numbers that strengthened or softened the data and  
354 conclusions, with 4.9% displaying major changes in the conclusions. Among non-COVID-19 abstracts,  
355 77.7% did not have significantly altered abstracts, 20.2% had altered wording or numbers in the  
356 abstract with 1.01% having major changes following peer review.

357 We next assessed the content of the preprint-paper pairs, focussing on the figures and tables. For  
358 both COVID-19 and non-COVID-19 preprints, over 60% did not exhibit any additions, removals, or  
359 rearrangements from the preprinted manuscript (Fig. 5F). Where we did observe a change, this was  
360 often a re-arranging of the panels across figures or between the main paper and supplementary  
361 sections. Importantly, we scored over 24.75% of COVID-19 preprints as having significant content  
362 added or removed from figures, a similar score to non-COVID-19 preprints (21.21%). Surprisingly,  
363 61.3% of COVID-19 preprints and 62.6% of non-COVID-19 preprints had no panel additions, removals,  
364 or rearrangements at all (Supplemental Fig. 5G). Furthermore, we found that COVID-19 preprints and  
365 papers contained significantly fewer total numbers of panels and tables than non-COVID-19 preprints  
366 and papers (two-way mixed ANOVA;  $F_{1,198} = 16.0$ ,  $p < 0.001$ , mean difference = 4.7); though there was  
367 no difference between preprint and paper pairs ( $F_{1,199} = 0.294$ ,  $p = 0.588$ ) (Supplemental Fig. 5H).

368 Our data demonstrates that there is a public scrutiny of high-attention COVID-19 preprints and for  
369 preprints published within our timeframe there was little change in the number or arrangement of  
370 figure panels and tables of preprints compared to the published paper. Tracking with our earlier  
371 observations of diminished word counts, COVID-19 preprints have markedly fewer figure panels and  
372 tables than other preprints.

373

374 **Table 4. Top 10 most commented COVID-19 preprints**

375

## 376 Discussion

377 Our results show that preprints have been widely adopted and used for the communication of COVID-  
378 19 research, and in turn, the pandemic has left what is likely to be a lasting imprint on the preprint  
379 and science publishing landscape.

380 The evolution of the preprint response to COVID-19 has been in stark contrast to previous major  
381 infectious diseases outbreaks: Johansson et al. [19] found only 174 preprints in a range of repositories  
382 (including bioRxiv) were posted in response to the 2015-2016 Zika virus outbreak, and 74 preprints  
383 were posted in response to the 2013-2016 Western African Ebola virus outbreak. The number of  
384 preprints posted in response to these two outbreaks was dwarfed by the number of peer-reviewed  
385 journal articles, where 1,641 and 2,187 PubMed-indexed journal articles related to Ebola and Zika,  
386 respectively, were published in the same period [19]. In comparison, in just 4 months following the  
387 first case of COVID-19, 2,527 preprints have been posted to bioRxiv and medRxiv alone, and >40% of  
388 the total COVID-19 literature to date has been posted via preprints (Figure 1B).

389 The need to rapidly communicate findings prior to a lengthy review process might be driving more  
390 authors to post preprints in response to COVID-19 (Fig.3). A recent study involving qualitative  
391 interviews of multiple research stakeholders found “early and rapid dissemination” to be amongst the  
392 most often cited benefits of preprints [36]. These findings were echoed in a survey of ~4200 bioRxiv  
393 users [12], and are underscored by the 6 month median lag between posting of a preprint and  
394 subsequent journal publication [7,37]. Such timelines for disseminating findings are clearly  
395 incompatible with the lightning-quick progression of a pandemic. An analysis of publication timelines  
396 for 14 medical journals has shown that some publishers have taken steps to accelerate their publishing  
397 processes for COVID-19 research, reducing the time for the peer-review stage (submission to  
398 acceptance) on average by 45 days, and the editing stage (acceptance to publication) by 14 days [38],  
399 yet this still falls some way short of the ~1-3 day screening time for bioRxiv and medRxiv preprints (Fig.  
400 2B).

401 A number of additional motivations driving the increase in preprints in response to COVID-19 may fall  
402 on a spectrum from altruistic (e.g. to make findings openly available for everyone) to egotistic (e.g. to  
403 stamp a priority claim on a finding to prevent being “scooped”), all of which may be amplified by the  
404 unique circumstances of the COVID-19 outbreak. Further studies on this aspect, for example through  
405 quantitative and qualitative author surveys may help funders and other stakeholders that support the  
406 usage of preprints to address some of the social barriers for their uptake [39].

407 bioRxiv and medRxiv included a banner to explain that preprints should not be regarded as conclusive  
408 and not reported on in the news media as established information [40]. Despite the warning message,  
409 COVID-19 preprints have received unprecedented coverage on online media platforms (Fig. 4). Twitter  
410 has been a particularly notable outlet for communication of preprints, although questions of exactly  
411 *who* is tweeting about COVID-19 research, and what that means in terms of societal impact, remain  
412 open. Twitter might not fully reflect public interest in research, as tweets are overrepresented by  
413 academic users [41], and Twitter metrics may largely be dominated by mechanical retweeting rather  
414 than reflecting original thought [42], although engagement levels may be generally higher for  
415 biomedical research than for research from other fields [43]. This is underscored by the relatively weak  
416 correlation found between citations and other indicators of online sharing (Fig 4E): of the articles in  
417 the top-10 most shared on twitter, in news articles or on blogs, only one is ranked amongst the top-  
418 10 most cited articles (Supplemental Fig. 4B). Hashtags associated with individual, highly tweeted  
419 preprints reveal some emergent themes that suggest communication of certain preprints can,  
420 however, extend well beyond scientific audiences (Supplemental Fig. 4). These range from good public  
421 health practice (“#washyourhands”) to right-wing philosophies and conspiracy theories, (“#fakenews”  
422 and “#endthelockdown”). This type of misinformation is common to new diseases [44] and social  
423 media platforms have recently released a statement outlining their plans to combat this issue [45]. It  
424 is also interesting to note that several preprints received negatively by the scientific community are  
425 amongst the most tweeted: the preprint (“Uncanny similarity of unique inserts in the 2019-nCoV spike  
426 protein to HIV-1 gp120 and Gag”; [46]), was withdrawn within 3 days by the authors following critical  
427 comments. These findings make clear that indicators of social media sharing, at least within the  
428 context of COVID-19, should be carefully interpreted and not used as direct indicators or proxies of  
429 scientific quality.

430 The fact that news outlets are reporting extensively on COVID-19 preprints (Fig. 4B and 4C) represents  
431 a marked change in journalistic practice: pre-pandemic bioRxiv preprints received, in comparison to  
432 journal articles, very little coverage [37]. This cultural shift provides an unprecedented opportunity to  
433 bridge the scientific and media communities to create a consensus on the reporting of preprints [47].  
434 In the near future, we aim to examine whether this change in practice extends beyond the media to  
435 governments and policy-making bodies

436 It is not just preprints serving to inform the global pandemic response: the pandemic, in turn, is having  
437 a major impact on peer-review and traditional scientific communication practices. Are these changes  
438 in practice having a knock-on effect on peer review? To address this in our data, we compared  
439 preprint-paper pairs across a range of metrics (Fig. 5). We were surprised to find that there was little

440 change between the number of figure panels and tables between preprint and subsequent published  
441 manuscript – for both COVID-19 and non-COVID-19 preprints. Where we did observe addition or  
442 removal of content, we rarely categorised this as significantly altering the conclusions stated in the  
443 abstract, though there were more incidences of major abstract changes among COVID-19 preprints  
444 than non-COVID-19 preprints (4.9% vs 1.0%). This supports other recent observations suggesting little  
445 change between preprints and their published paper [48]. While comparing the preprint-paper pairs,  
446 we noticed a high number of pairs for which data was harder to access after publication (often due to  
447 broken links to supplemental material). It remains important to recognise, however, that our data  
448 suffers from survivorship and selection bias, as those preprints published within our short timeframe  
449 are potentially more likely to be of a higher standard than preprints which are not published or take  
450 longer to reach publication. This is particularly relevant for the subset of COVID-19 preprints which  
451 undergo more version changes than non-COVID-19 preprints.

452 Readers cannot use the journal in which papers have been published as a mechanism to judge their  
453 reception among peers. As most COVID-19-preprints were not yet published, concerns regarding  
454 quality will persist. Despite increased publicity for established preprint-review services (such as  
455 PRereview [27,49], there has been limited use of these platforms [50]. However, independent  
456 preprint-review projects have arisen whereby reviews are posted in the comments section of preprint  
457 servers and hosted on independent websites [34]. These more formal projects partly account for the  
458 increased commenting on COVID-19 preprints (Fig. 5). However, it is clear that the general public are  
459 also using the commenting systems in addition to scientists. Moreover, prominent scientists are using  
460 social media platforms such as Twitter to publicly share concerns with poor quality COVID-19 preprints  
461 or to amplify high-quality preprints [51].

462 Our data demonstrates the indispensable role that preprints, and preprint servers, are playing during  
463 a global pandemic. By communicating science through open-access preprints, we are sharing at a  
464 faster rate than allowed by the current journal infrastructure, with limited impact on the quality of  
465 preprints that are subsequently published.

466

## 467 [Methods](#)

468

### 469 [Preprint Metadata for bioRxiv and medRxiv](#)

470 We retrieved basic preprint metadata (DOIs, titles, abstracts, author names, corresponding author  
471 name and institution, dates, versions, licenses, categories and published article links) for bioRxiv and



472 medRxiv preprints via the bioRxiv Application Programming Interface (API; <https://api.biorxiv.org>).  
473 The API accepts a 'server' parameter to enable retrieval of records for both bioRxiv and medRxiv. We  
474 initially collected metadata for all preprints posted from the time of the server's launch, corresponding  
475 to November 2013 for bioRxiv and June 2019 for medRxiv, until the end of our analysis period on 30th  
476 April 2020 (N = 84,524). All data were collected on 1st May 2020. Note that where multiple preprint  
477 versions existed, we included only the earliest version and recorded the total number of following  
478 revisions. Preprints were classified as "COVID-19 preprints" or "Non-COVID-19 preprints" on the basis  
479 of the following terms contained within their titles or abstracts (case-insensitive): "coronavirus",  
480 "covid-19", "sars-cov", "ncov-2019", "2019-ncov", "hcov-19", "sars-2". For comparison of preprint  
481 behaviour between the COVID-19 outbreak and previous viral epidemics, namely Western Africa Ebola  
482 virus and Zika virus (Supplemental Fig. 1), the same procedure was applied using the keywords "ebola"  
483 or "zebov", and "zika" or "zikh", respectively.

484 For a subset of preprints posted between 1st September 2019 and 30th April 2020 (N = 25,883), we  
485 enhanced the basic preprint metadata with data from a number of other sources, as outlined below.  
486 Note that this time period was chosen to encapsulate our 4-month analysis period from 1st January  
487 to 30th April 2020 (N = 14,812), as well as the preceding 4-month period from September 1st to  
488 December 31st 2019 (N = 11,071), to use for comparison purposes. Of the preprints contained in the  
489 later 4-month analysis period, 2,527 (17.1%) contained COVID-19 related keywords in their titles or  
490 abstracts.

491 For all preprints contained in the subset, disambiguated author affiliation and country data for  
492 corresponding authors were retrieved by querying raw affiliation strings against the Research  
493 Organisation Registry (ROR) API (<https://github.com/ror-community/ror-api>). The API provides a  
494 service for matching affiliation strings against institutions contained in the registry, on the basis of  
495 multiple matching types (named "phrase", "common terms", "fuzzy", "heuristics", and "acronyms").  
496 The service returns a list of potential matched institutions and their country, as well as the matching  
497 type used, a confidence score with values between 0 and 1, and a binary "chosen" indicator relating  
498 to the most confidently matched institution. A small number (~500) of raw affiliation strings returned  
499 from the bioRxiv API were truncated at 160 characters; for these records we conducted web-scraping  
500 using the rvest package for R [52] to retrieve the full affiliation strings of corresponding authors from  
501 the bioRxiv public webpages, prior to matching. For the purposes of our study, we aimed for higher  
502 precision than recall, and thus only included matched institutions where the API returned a confidence  
503 score of 1. A manual check of a sample of returned results also suggested higher precision for results  
504 returned using the "PHRASE" matching type, and thus we only retained results using this matching  
505 type. In a final step, we applied manual corrections to the country information for a small subset of

506 records where false positives would be most likely to influence our results by a) iteratively examining  
507 the chronologically first preprint associated with each country following affiliation matching and  
508 applying manual rules to correct mismatched institutions until no further errors were detected (n = 8  
509 institutions); and b) examining the top 50 most common raw affiliation strings and applying manual  
510 rules to correct any mismatched or unmatched institutions (n = 2 institutions). In total, we matched  
511 19,002 preprints to a country (73.2%); for COVID-19 preprints alone, 1716 preprints (67.9%) were  
512 matched to a country. Note that a similar, albeit more sophisticated method of matching bioRxiv  
513 affiliation information with the ROR API service was recently documented by Abdill et al. [53].

514 Word counts and reference counts for each preprint were also added to the basic preprint metadata  
515 via scraping of the bioRxiv public webpages (medRxiv currently does not display full HTML texts, and  
516 so calculating word and reference counts was limited to bioRxiv preprints). Web scraping was  
517 conducted using the rvest package for R [52]. Word counts refer to words contained only in the main  
518 body text, after removing the abstract, figure captions, table captions, acknowledgements and  
519 references. In a small number of cases, word counts could not be retrieved because no full-text  
520 existed; this occurs as we targeted only the first version of a preprint, but in cases where a second  
521 version was uploaded very shortly (i.e. within a few days) after the first version, the full-text article  
522 was generated only for the second version. Word and reference counts were retrieved for 21,975 of  
523 22,156 bioRxiv preprints (99.1%); for COVID-19 preprints alone, word and reference counts were  
524 retrieved for 553 of 564 preprints (98.0 %). Word counts ranged from 583 to 39,953 words, whilst  
525 reference counts ranged from 1 to 487 references.

526 Our basic preprint metadata retrieved from the bioRxiv API also contained DOI links to published  
527 versions (i.e. a peer-reviewed journal article) of preprints, where available. In total, 2710 records in  
528 our preprint subset (10.5%) contained links to published articles, although of COVID-19 preprints only  
529 101 preprints contained such links (4.0%). It should be noted that COVID-19 articles are heavily  
530 weighted towards the most recent months of the dataset and have thus had less time to progress  
531 through the journal publication process. Links to published articles are likely an underestimate of the  
532 total proportion of articles that have been subsequently published in journals – both as a result of the  
533 delay between articles being published in a journal and being detected by bioRxiv, and bioRxiv missing  
534 some links to published articles when e.g. titles change significantly between the preprint and  
535 published version [37]. Published article metadata (titles, abstracts, publication dates, journal and  
536 publisher name) were retrieved by querying each DOI against the Crossref API  
537 (<https://api.crossref.org>), using the rcrossref package for R [54]. We also retrieved data regarding the  
538 open access status of each article by querying each DOI against the Unpaywall API, via the roadoi  
539 package for R [55].

540

#### 541 Usage, Altmetrics and Citation Data

542 For investigating the rates at which preprints are used, shared and cited, we collected detailed usage,  
543 altmetrics and citation data for all bioRxiv and medRxiv preprints posted between 1st September 2019  
544 to 30th April 2020 (i.e. for every preprint where we collected detailed metadata, as described in the  
545 previous section). Collection of all usage, altmetrics and citation data were conducted on 1st May  
546 2020.

547 Usage data (abstract views and pdf downloads) were scraped from the bioRxiv and medRxiv public  
548 webpages, using the rvest package for R (Wickham, 2019). bioRxiv and medRxiv webpages display  
549 abstract views and pdf downloads on a calendar month basis; for subsequent analysis (e.g Figure 4),  
550 these were summed to generate total abstract views and downloads since the time of preprint  
551 posting. In total, usage data were recorded for 25,865 preprints (99.9%) – a small number were not  
552 recorded, possibly due to server issues during the web scraping process. Note that bioRxiv webpages  
553 also display counts of full-text views, although we did not include these data in our final analysis. This  
554 was partially to ensure consistency with medRxiv, which currently does not provide display full HTML  
555 texts, and partially due to ambiguities in the timeline of full-text publishing – the full text of a preprint  
556 is added several days after the preprint is first available, but the exact delay appears to vary from  
557 preprint to preprint. We also compared rates of PDF downloads for bioRxiv and medRxiv preprints  
558 with a number of other preprint servers (Preprints.org, SSRN, and Research Square) (Supplemental  
559 Fig. 3C) - these data were provided directly by representatives of each of the respective preprint  
560 servers.

561 Counts of multiple altmetric indicators (mentions in tweets, blogs, and news articles) were retrieved  
562 via Altmetric (<https://www.altmetric.com>), a service that monitors and aggregates mentions to  
563 scientific articles on various online platforms. Altmetric provide a free API (<https://api.altmetric.com>)  
564 against which we queried each preprint DOI in our analysis set. Importantly, Altmetric only contains  
565 records where an article has been mentioned in at least one of the sources tracked, thus, if our query  
566 returned an invalid response we recorded counts for all indicators as zero. Coverage of each indicator  
567 (i.e. the proportion of preprints receiving at least a single mention in a particular source) for preprints  
568 were 99.1%, 9.6%, and 3.5% for mentions in tweets, blogs and news articles respectively. The high  
569 coverage on Twitter is likely driven, at least in part, by automated tweeting of preprints by the official  
570 bioRxiv and medRxiv twitter accounts. For COVID-19 preprints, coverage was found to be 100.0%,  
571 16.6% and 26.9% for mentions in tweets, blogs and news articles respectively.

572 COVID-19 preprints may receive large volumes of usage and attention as a result of their perceived  
573 quality being either high or low. To quantitatively capture whether high-usage preprints were well-  
574 received by both public audiences, we firstly retrieved all tweets linking to the top ten most-tweeted  
575 preprints. Tweet IDs were retrieved via the Altmetric API service, and then queried against the Twitter  
576 API using the rtweet package [56] for R, to retrieve full tweet content (e.g. tweet text, hashtags). We  
577 examined the positivity or negativity of each tweet text by calculating the average sentiment polarity  
578 scores over all sentences using the sentimentr package for R [57]. Polarity of terms was determined  
579 using an adjusted Semantic Orientation CALculator (SO-CAL) lexicon [58], neutralising scores for  
580 various common scientific or infectious disease related terms, e.g. “respiratory”, “cellular”, “abstract”.  
581 Polarity was adjusted for valence shifters, i.e. words or phrases that contextually alter sentiment, for  
582 example the term “not” in the statement “this preprint is not interesting” would negate the otherwise-  
583 positive term “interesting”. To avoid any potential bias, preprint title strings were excluded from tweet  
584 texts before sentiment was calculated.

585 Citations counts for each preprint were retrieved from the scholarly indexing database Dimensions  
586 (<https://dimensions.ai>). An advantage of using Dimensions in comparison to more traditional citation  
587 databases (e.g. Scopus, Web of Science) is that Dimensions also includes preprints from several  
588 sources within their database (including from bioRxiv and medRxiv), as well as their respective citation  
589 counts. When a preprint was not found, we recorded its citation counts as zero. Of all preprints, 3707  
590 (14.3%) recorded at least a single citation in Dimensions. For COVID-19 preprints, 774 preprints  
591 (30.6%) recorded at least a single citation.

592

### 593 [Comments](#)

594 BioRxiv and medRxiv html pages feature a Disqus (<https://disqus.com>) comment platform to allow  
595 readers to post text comments. Comment counts for each bioRxiv and medRxiv preprint were  
596 retrieved via the Disqus API service (<https://disqus.com/api/docs/>). Where multiple preprint versions  
597 existed, comments were aggregated over all versions. As with preprint perceptions among public  
598 audiences on Twitter, we then examined perceptions among academic audiences by examining  
599 comment sentiment. Text content of comments for COVID-19 preprints were provided directly by the  
600 bioRxiv development team. Sentiment polarity scores were calculated for each comment on the top  
601 ten most-commented preprints using the lexicon and protocol previously described for the analysis of  
602 tweet sentiment.

### 603 Screening time for bioRxiv and medRxiv

604 To calculate screening time, we followed the method outlined by Steve Royle [59]. In short, we  
605 calculate the screening time as the difference in days between the preprint posting date, and the date  
606 stamp of submission approval contained within bioRxiv and medRxiv DOIs (only available for preprints  
607 posted after December 11<sup>th</sup> 2019). bioRxiv and medRxiv preprints were filtered to preprints posted  
608 between January 1<sup>st</sup> – April 30<sup>th</sup> 2020, accounting for the first version of a posted preprint.

609

### 610 Comparisons between preprints and their published articles

611 We identified all bioRxiv and medRxiv preprints from our bioRxiv and medRxiv preprints that have  
612 been published in peer-reviewed journals (using journal DOIs extracted from the preprint metadata),  
613 resulting in a set of 101 preprint-paper pairs. We generated a control set of 101 non-COVID-19  
614 preprint-paper pairs by drawing a random subset of all bioRxiv and medRxiv preprints published in  
615 peer reviewed journals within the extended analysis period (1st September 2019 and 30th April 2020;  
616 see “Preprint Metadata for bioRxiv and medRxiv” for additional details), preserving the same ratio of  
617 bioRxiv:medRxiv preprints as in the COVID-19 set. Each preprint-paper pair was then scored  
618 independently by two referees using a variety of quantitative and qualitative metrics reporting on  
619 changes in data presentation and organisation, the quantity of data, and the communication of  
620 quantitative and qualitative outcomes between paper and preprint (using the reporting questionnaire  
621 provided as supplemental material). Of particular note: individual figure panels were counted as such  
622 when labelled with a letter, and for pooled analyses a full table was treated as a single-panel figure.  
623 The number of figures and figure panels was capped at 10 each (Any additional figures/panels were  
624 pooled), and the number of supplementary items (files/figures/documents) was capped at 5. In the  
625 case of preprints with multiple versions, the comparison was always restricted to version 1 of the  
626 preprint. Any conflicting assessments were resolved by a third independent referee, resulting in a final  
627 consensus report for 99 non-COVID-19 and 101 COVID-19 preprint-paper pairs (excluding 10 pairs not  
628 meeting the initial selection criteria or those still awaiting post-publication reviews). This final dataset  
629 was used to generate the graphs in Fig. 5E, 5F and Supplementary Fig. 5D-G.

630

### 631 Statistical analyses

632 Preprint counts were compared across categories (e.g., COVID-19 or non-COVID-19) using Chi-square  
633 tests or, in cases where any expected values were < 5, with Fisher’s exact tests using Monte Carlo  
634 simulation. Quantitative preprint metrics (e.g. word count, comment count) were compared across  
635 categories using Mann-Whitney tests and correlated with other quantitative metrics using Spearman’s  
636 rank tests for univariate comparisons.

637 For time-variant metrics (e.g. views, downloads, which may be expected to vary with length of preprint  
638 availability), we analysed the difference between COVID-19 and non-COVID-19 preprints using  
639 generalised linear regression models with calendar days since Jan 1<sup>st</sup> 2020 as an additional covariate  
640 and negative binomially-distributed errors. This allowed estimates of time-adjusted odds ratios  
641 comparing COVID-19 and non-COVID-19 preprint metrics. Negative binomial regressions were  
642 constructed using the function 'glm.nb' in R package MASS [60]. For multivariate categorical  
643 comparisons of preprint metrics (e.g. screening time between preprint type and preprint server), we  
644 constructed two-way factorial ANOVAs, testing for interactions between both category variables in all  
645 cases. Pairwise post-hoc comparisons of interest were tested using Tukey's honest significant  
646 difference (HSD) while correcting for multiple testing, using function 'glht' in R package multcomp  
647 [61].

648

#### 649 [Parameters and limitations of this study](#)

650 We acknowledge a number of limitations in our study. Firstly, to assign a preprint as COVID-19 or not,  
651 we used keyword matching to titles/abstracts on the preprint version at the time of our data  
652 extraction. This means we may have captured some early preprints, posted before the pandemic, that  
653 had been subtly revised to include a keyword relating to COVID-19. Our data collection period was a  
654 tightly defined window (January-April 2020) which may impact upon the altmetric and usage data we  
655 collect as those preprints posted at the end of April would have had less time to accrue these metrics.  
656 In addition, our data discussing preprint-paper differences suffers from survivorship and selection bias  
657 in that we could only examine preprints that have been published and our findings may not be  
658 generalisable to all preprints. A larger, more comprehensive sample would be necessary for more  
659 conclusive statements to be made.

660

#### 661 [Acknowledgements](#)

662 The authors would like to thank Ted Roeder, John Inglis and Richard Sever from bioRxiv and medRxiv  
663 for providing information relating to comments on COVID-19 preprints. We would also like to thank  
664 Martyn Rittman (preprints.org), Shirley Decker-Lucke (SSRN) and Michele Avissar-Whiting (Research  
665 Square) for kindly providing usage data. Further thanks to Helena Brown and Sarah Bunn for  
666 conversations regarding media usage and government policy.

667

## 668 Author contributions

669 Conceptualisation, N.F., L.B., G.D., J.K.P., M.P., J.A.C.; Methodology, N.F., L.B., G.D., J.A.C.; Software,  
670 N.F., L.B.; Validation, N.F., L.B., J.A.C.; Formal analysis, N.F., L.B., G.D., J.A.C.; Investigation, N.F., L.B.,  
671 G.D., J.K.P., M.P., J.A.C.; Resources, J.P. and J.A.C.; Data curation, N.F., L.B., G.D., J.A.C.; Writing –  
672 original draft, N.F., L.B., G.D., J.K.P., M.P., J.A.C.; Writing – Review & editing, N.F., L.B., G.D., J.K.P.,  
673 M.P., J.A.C.; Visualisation, N.F., L.B., G.D., J.A.C.; Supervision, J.A.C.; Project administration, J.A.C.  
674

## 675 Data availability

676 All data and code used in this study are available on github ([https://github.com/preprinting-a-](https://github.com/preprinting-a-pandemic/pandemic_preprints)  
677 [pandemic/pandemic\\_preprints](https://github.com/preprinting-a-pandemic/pandemic_preprints)), with the exception of data provided by preprint servers, publishers  
678 and raw tweet data. Data not publicly available may be shared following permission from the  
679 relevant provider and upon request to the corresponding author.

680

## 681 Declaration of interests

682 JP is the executive director of ASAPbio, a non-profit organization promoting the productive use of  
683 preprints in the life sciences. GD is a bioRxiv Affiliate, part of a volunteer group of scientists that screen  
684 preprints deposited on the bioRxiv server. MP is the community manager for preLights, a non-profit  
685 preprint highlighting service. GD and JAC are contributors to preLights. The authors declare no other  
686 competing interests.

687

## 688 References

- 689 1. WHO. COVID-19 situation report 19. 8 Feb 2020 [cited 13 May 2020]. Available:  
690 [https://www.who.int/docs/default-source/coronaviruse/situation-reports/20200501-covid-19-](https://www.who.int/docs/default-source/coronaviruse/situation-reports/20200501-covid-19-sitrep.pdf)  
691 [sitrep.pdf](https://www.who.int/docs/default-source/coronaviruse/situation-reports/20200501-covid-19-sitrep.pdf)
- 692 2. Zhu N, Zhang D, Wang W, Li X, Yang B, Song J, et al. A Novel Coronavirus from Patients with  
693 Pneumonia in China, 2019. *N Engl J Med.* 2020;382: 727–733. doi:10.1056/NEJMoa2001017
- 694 3. Coronaviridae Study Group of the International Committee on Taxonomy of Viruses. The  
695 species Severe acute respiratory syndrome-related coronavirus: classifying 2019-nCoV and  
696 naming it SARS-CoV-2. *Nat Microbiol.* 2020;5: 536–544. doi:10.1038/s41564-020-0695-z
- 697 4. Ksiazek TG, Erdman D, Goldsmith CS, Zaki SR, Peret T, Emery S, et al. A Novel Coronavirus  
698 Associated with Severe Acute Respiratory Syndrome. In:  
699 <http://dx.doi.org/10.1056/NEJMoa030781> [Internet]. Massachusetts Medical Society; 7 Oct  
700 2009 [cited 13 May 2020]. doi:10.1056/NEJMoa030781



- 701 5. Zaki AM, van Boheemen S, Bestebroer TM, Osterhaus ADME, Fouchier RAM. Isolation of a  
702 Novel Coronavirus from a Man with Pneumonia in Saudi Arabia. *N Engl J Med*. 2012;367: 1814–  
703 1820. doi:10.1056/NEJMoa1211721
- 704 6. Wallach JD, Egilman AC, Gopal AD, Swami N, Krumholz HM, Ross JS. Biomedical journal speed  
705 and efficiency: a cross-sectional pilot survey of author experiences. *Res Integr Peer Rev*.  
706 2018;3: 1. doi:10.1186/s41073-017-0045-8
- 707 7. Abdill RJ, Blekhman R. Tracking the popularity and outcomes of all bioRxiv preprints. Pewsey E,  
708 Rodgers P, Greene CS, editors. *eLife*. 2019;8: e45133. doi:10.7554/eLife.45133
- 709 8. Powell K. Does it take too long to publish research? *Nat News*. 2016;530: 148.  
710 doi:10.1038/530148a
- 711 9. Vale RD. Accelerating scientific publication in biology. *Proc Natl Acad Sci*. 2015;112: 13439–  
712 13446. doi:10.1073/pnas.1511912112
- 713 10. Evans JA, Reimer J. Open Access and Global Participation in Science. *Science*. 2009;323: 1025–  
714 1025. doi:10.1126/science.1154562
- 715 11. Piwowar H, Priem J, Larivière V, Alperin JP, Matthias L, Norlander B, et al. The state of OA: a  
716 large-scale analysis of the prevalence and impact of Open Access articles. *PeerJ*. 2018;6: e4375.  
717 doi:10.7717/peerj.4375
- 718 12. Sever R, Roeder T, Hindle S, Sussman L, Black K-J, Argentine J, et al. bioRxiv: the preprint server  
719 for biology. *bioRxiv*. 2019; 833400. doi:10.1101/833400
- 720 13. Cobb M. The prehistory of biology preprints: A forgotten experiment from the 1960s. *PLOS*  
721 *Biol*. 2017;15: e2003995. doi:10.1371/journal.pbio.2003995
- 722 14. Ginsparg P. It was twenty years ago today ... ArXiv11082700 Astro-Ph Physicscond-Mat  
723 Physicsgr-Qc Physicshep-Ph Physicshep-Th Physicsphysics Physicsquant-Ph. 2011 [cited 13 May  
724 2020]. Available: <http://arxiv.org/abs/1108.2700>
- 725 15. Rawlinson C, Bloom T. New preprint server for medical research. *BMJ*. 2019;365.  
726 doi:10.1136/bmj.l2301
- 727 16. Tabor E. Prepublication culture in clinical research. *The Lancet*. 2016;387: 750.  
728 doi:10.1016/S0140-6736(16)00330-5
- 729 17. Kaiser J, 2014, Am 12:00. BioRxiv at 1 year: A promising start. In: *Science | AAAS* [Internet]. 11  
730 Nov 2014 [cited 13 May 2020]. Available: [https://www.sciencemag.org/news/2014/11/biorxiv-](https://www.sciencemag.org/news/2014/11/biorxiv-1-year-promising-start)  
731 [1-year-promising-start](https://www.sciencemag.org/news/2014/11/biorxiv-1-year-promising-start)
- 732 18. Wellcome Trust. Sharing data during Zika and other global health emergencies | Wellcome. In:  
733 *Wellcome.ac.uk* [Internet]. 10 Feb 2016 [cited 13 May 2020]. Available:  
734 <https://wellcome.ac.uk/news/sharing-data-during-zika-and-other-global-health-emergencies>
- 735 19. Johansson MA, Reich NG, Meyers LA, Lipsitch M. Preprints: An underutilized mechanism to  
736 accelerate outbreak science. *PLOS Med*. 2018;15: e1002549.  
737 doi:10.1371/journal.pmed.1002549

- 738 20. WHO. WHO Director-General's opening remarks at the media briefing on COVID-19 - 11 March  
739 2020. 11 Mar 2020 [cited 13 May 2020]. Available:  
740 [https://www.who.int/dg/speeches/detail/who-director-general-s-opening-remarks-at-the-](https://www.who.int/dg/speeches/detail/who-director-general-s-opening-remarks-at-the-media-briefing-on-covid-19---11-march-2020)  
741 [media-briefing-on-covid-19---11-march-2020](https://www.who.int/dg/speeches/detail/who-director-general-s-opening-remarks-at-the-media-briefing-on-covid-19---11-march-2020)
- 742 21. Cheng C, Barcelo J, Hartnett A, Kubinec R, Messerschmidt L. CoronaNet: A Dyadic Dataset of  
743 Government Responses to the COVID-19 Pandemic. 2020 [cited 27 Apr 2020].  
744 doi:10.31235/osf.io/dkvxy
- 745 22. Fraser N, Kramer B. covid19\_preprints. 2020. doi:10.6084/m9.figshare.12033672.v14
- 746 23. Wellcome Trust. Coronavirus (COVID-19): sharing research data | Wellcome. 31 Jan 2020 [cited  
747 21 May 2020]. Available: <https://wellcome.ac.uk/coronavirus-covid-19/open-data>
- 748 24. Nature Editorial. Calling all coronavirus researchers: keep sharing, stay open. *Nature*. 2020;578:  
749 7–7. doi:10.1038/d41586-020-00307-x
- 750 25. Wellcome Trust. Publishers make coronavirus (COVID-19) content freely available and reusable  
751 | Wellcome. 16 Mar 2020 [cited 21 May 2020]. Available: [https://wellcome.ac.uk/press-](https://wellcome.ac.uk/press-release/publishers-make-coronavirus-covid-19-content-freely-available-and-reusable)  
752 [release/publishers-make-coronavirus-covid-19-content-freely-available-and-reusable](https://wellcome.ac.uk/press-release/publishers-make-coronavirus-covid-19-content-freely-available-and-reusable)
- 753 26. Eisen MB, Akhmanova A, Behrens TE, Weigel D. Publishing in the time of COVID-19. *eLife*.  
754 2020;9: e57162. doi:10.7554/eLife.57162
- 755 27. OASPA. COVID-19 Publishers Open Letter of Intent - Rapid Review. In: OASPA [Internet]. 27  
756 May 2020 [cited 13 May 2020]. Available: [https://oaspa.org/covid-19-publishers-open-letter-](https://oaspa.org/covid-19-publishers-open-letter-of-intent-rapid-review/)  
757 [of-intent-rapid-review/](https://oaspa.org/covid-19-publishers-open-letter-of-intent-rapid-review/)
- 758 28. Himmelstein D. The licensing of bioRxiv preprints. Satoshi Village. 2016 [cited 19 May 2020].  
759 Available: <https://blog.dhimmel.com/biorxiv-licenses/>
- 760 29. ASAPbio. [asapbio/licensing](https://github.com/asapbio/licensing). ASAPbio; 2018. Available: <https://github.com/asapbio/licensing>
- 761 30. Bendavid E, Mulaney B, Sood N, Shah S, Ling E, Bromley-Dulfano R, et al. COVID-19 Antibody  
762 Seroprevalence in Santa Clara County, California. *medRxiv*. 2020; 2020.04.14.20062463.  
763 doi:10.1101/2020.04.14.20062463
- 764 31. Doremalen N van, Bushmaker T, Morris D, Holbrook M, Gamble A, Williamson B, et al. Aerosol  
765 and surface stability of HCoV-19 (SARS-CoV-2) compared to SARS-CoV-1. *medRxiv*. 2020;  
766 2020.03.09.20033217. doi:10.1101/2020.03.09.20033217
- 767 32. Magagnoli J, Narendran S, Pereira F, Cummings T, Hardin JW, Sutton SS, et al. Outcomes of  
768 hydroxychloroquine usage in United States veterans hospitalized with Covid-19. *medRxiv*.  
769 2020; 2020.04.16.20065920. doi:10.1101/2020.04.16.20065920
- 770 33. Gog JR. How you can help with COVID-19 modelling. *Nat Rev Phys*. 2020; 1–2.  
771 doi:10.1038/s42254-020-0175-7
- 772 34. Vabret N, Samstein R, Fernandez N, Merad M. Advancing scientific knowledge in times of  
773 pandemics. *Nat Rev Immunol*. 2020; 1–1. doi:10.1038/s41577-020-0319-0
- 774 35. Oransky I, Markus A. Quick retraction of coronavirus paper was good moment for science. In:  
775 *STAT* [Internet]. 3 Feb 2020 [cited 18 May 2020]. Available:

- 776 [https://www.statnews.com/2020/02/03/retraction-faulty-coronavirus-paper-good-moment-](https://www.statnews.com/2020/02/03/retraction-faulty-coronavirus-paper-good-moment-for-science/)  
777 [for-science/](https://www.statnews.com/2020/02/03/retraction-faulty-coronavirus-paper-good-moment-for-science/)
- 778 36. Chiarelli A, Johnson R, Pinfield S, Richens E. Preprints and Scholarly Communication: An  
779 Exploratory Qualitative Study of Adoption, Practices, Drivers and Barriers. *F1000Research*.  
780 2019;8: 971. doi:10.12688/f1000research.19619.2
- 781 37. Fraser N, Momeni F, Mayr P, Peters I. The relationship between bioRxiv preprints, citations and  
782 altmetrics. *Quant Sci Stud*. 2020; 1–21. doi:10.1162/qss\_a\_00043
- 783 38. Horbach SPJM. Pandemic Publishing: Medical journals drastically speed up their publication  
784 process for Covid-19. *bioRxiv*. 2020; 2020.04.18.045963. doi:10.1101/2020.04.18.045963
- 785 39. Penfold NC, Polka JK. Technical and social issues influencing the adoption of preprints in the  
786 life sciences. *PLOS Genet*. 2020;16: e1008565. doi:10.1371/journal.pgen.1008565
- 787 40. Inglis J. We've just put an additional, cautionary note about the use of preprints on every  
788 @biorxivpreprint <https://t.co/08eSXL4dDi>. In: Twitter [Internet]. 1 Feb 2020 [cited 22 May  
789 2020]. Available: <https://twitter.com/johringlis/status/1223598414493077505>
- 790 41. Mohammadi E, Thelwall M, Kwasny M, Holmes KL. Academic information on Twitter: A user  
791 survey. *PLOS ONE*. 2018;13: e0197265. doi:10.1371/journal.pone.0197265
- 792 42. Robinson-Garcia N, Costas R, Isett K, Melkers J, Hicks D. The unbearable emptiness of  
793 tweeting—About journal articles. *PLoS ONE*. 2017;12. doi:10.1371/journal.pone.0183551
- 794 43. Hausteijn S, Peters I, Sugimoto CR, Thelwall M, Larivière V. Tweeting biomedicine: An analysis of  
795 tweets and citations in the biomedical literature. *J Assoc Inf Sci Technol*. 2014;65: 656–669.  
796 doi:10.1002/asi.23101
- 797 44. Mian A, Khan S. Coronavirus: the spread of misinformation. *BMC Med*. 2020;18.  
798 doi:10.1186/s12916-020-01556-3
- 799 45. Lally C, Christie L. COVID-19 misinformation. *UK Parliam POST*. 2020 [cited 21 May 2020].  
800 Available: <https://post.parliament.uk/analysis/covid-19-misinformation/>,  
801 <https://post.parliament.uk/analysis/covid-19-misinformation/>
- 802 46. Pradhan P, Pandey AK, Mishra A, Gupta P, Tripathi PK, Menon MB, et al. Uncanny similarity of  
803 unique inserts in the 2019-nCoV spike protein to HIV-1 gp120 and Gag. *bioRxiv*. 2020;  
804 2020.01.30.927871. doi:10.1101/2020.01.30.927871
- 805 47. Sheldon T. Preprints could promote confusion and distortion. *Nature*. 2018;559: 445–446.
- 806 48. Carneiro CFD, Queiroz VGS, Moulin TC, Carvalho CAM, Haas CB, Rayêe D, et al. Comparing  
807 quality of reporting between preprints and peer-reviewed articles in the biomedical literature.  
808 *bioRxiv*. 2020; 581892. doi:10.1101/581892
- 809 49. Johansson MA, Saderi D. Open peer-review platform for COVID-19 preprints. *Nature*.  
810 2020;579: 29–29. doi:10.1038/d41586-020-00613-4
- 811 50. Brierley L. The role of research preprints in the academic response to the COVID-19 epidemic.  
812 doi:10.22541/au.158516578.89167184

- 813 51. Markus A, Oransky I, Retraction Watch. Eye for Manipulation: A Profile of Elisabeth Bik. In: The  
814 Scientist Magazine® [Internet]. 7 May 2019 [cited 21 May 2020]. Available: [https://www.the-](https://www.the-scientist.com/news-opinion/eye-for-manipulation--a-profile-of-elisabeth-bik-65839)  
815 [scientist.com/news-opinion/eye-for-manipulation--a-profile-of-elisabeth-bik-65839](https://www.the-scientist.com/news-opinion/eye-for-manipulation--a-profile-of-elisabeth-bik-65839)
- 816 52. Wickham H, RStudio. rvest: Easily Harvest (Scrape) Web Pages. 2019. Available:  
817 <https://CRAN.R-project.org/package=rvest>
- 818 53. Abdill RJ, Adamowicz EM, Blekhman R. International authorship and collaboration in bioRxiv  
819 preprints. bioRxiv. 2020; 2020.04.25.060756. doi:10.1101/2020.04.25.060756
- 820 54. Chamberlain S, Zhu H, Jahn N, Boettiger C, Ram K. rcrossref: Client for Various “CrossRef”  
821 “APIs.” 2020. Available: <https://CRAN.R-project.org/package=rcrossref>
- 822 55. Jahn N, rOpenSci TS (Tuija S reviewed the package for,  
823 <https://github.com/ropensci/onboarding/issues/115>) see, rOpenSci RM (Ross M reviewed the  
824 package for, <https://github.com/ropensci/onboarding/issues/115>) see. roadoi: Find Free  
825 Versions of Scholarly Publications via Unpaywall. 2019. Available: [https://CRAN.R-](https://CRAN.R-project.org/package=roadoi)  
826 [project.org/package=roadoi](https://CRAN.R-project.org/package=roadoi)
- 827 56. Kearney M. rtweet: Collecting and analyzing Twitter data. J Open Source Softw. 2019;4: 1829.  
828 doi:10.21105/joss.01829
- 829 57. Rinker T. sentimentr: Calculate Text Polarity Sentiment. 2019. Available: [https://CRAN.R-](https://CRAN.R-project.org/package=sentimentr)  
830 [project.org/package=sentimentr](https://CRAN.R-project.org/package=sentimentr)
- 831 58. Taboada M, Brooke J, Tofiloski M, Voll K, Stede M. Lexicon-Based Methods for Sentiment  
832 Analysis. Comput Linguist. 2011;37: 267–307. doi:10.1162/COLI\_a\_00049
- 833 59. Steve Royle. Screenager: screening times at bioRxiv. In: quantixed [Internet]. 30 Mar 2020  
834 [cited 22 May 2020]. Available: [https://quantixed.org/2020/03/30/screenager-screening-](https://quantixed.org/2020/03/30/screenager-screening-times-at-biorxiv/)  
835 [times-at-biorxiv/](https://quantixed.org/2020/03/30/screenager-screening-times-at-biorxiv/)
- 836 60. Venables WN, Ripley BD. Modern Applied Statistics with S. 4th ed. New York: Springer-Verlag;  
837 2002. doi:10.1007/978-0-387-21706-2
- 838 61. Hothorn T, Bretz F, Westfall P. Simultaneous inference in general parametric models. Biom J  
839 Biom Z. 2008;50: 346–363. doi:10.1002/bimj.200810425

840

841

842 **Figures**

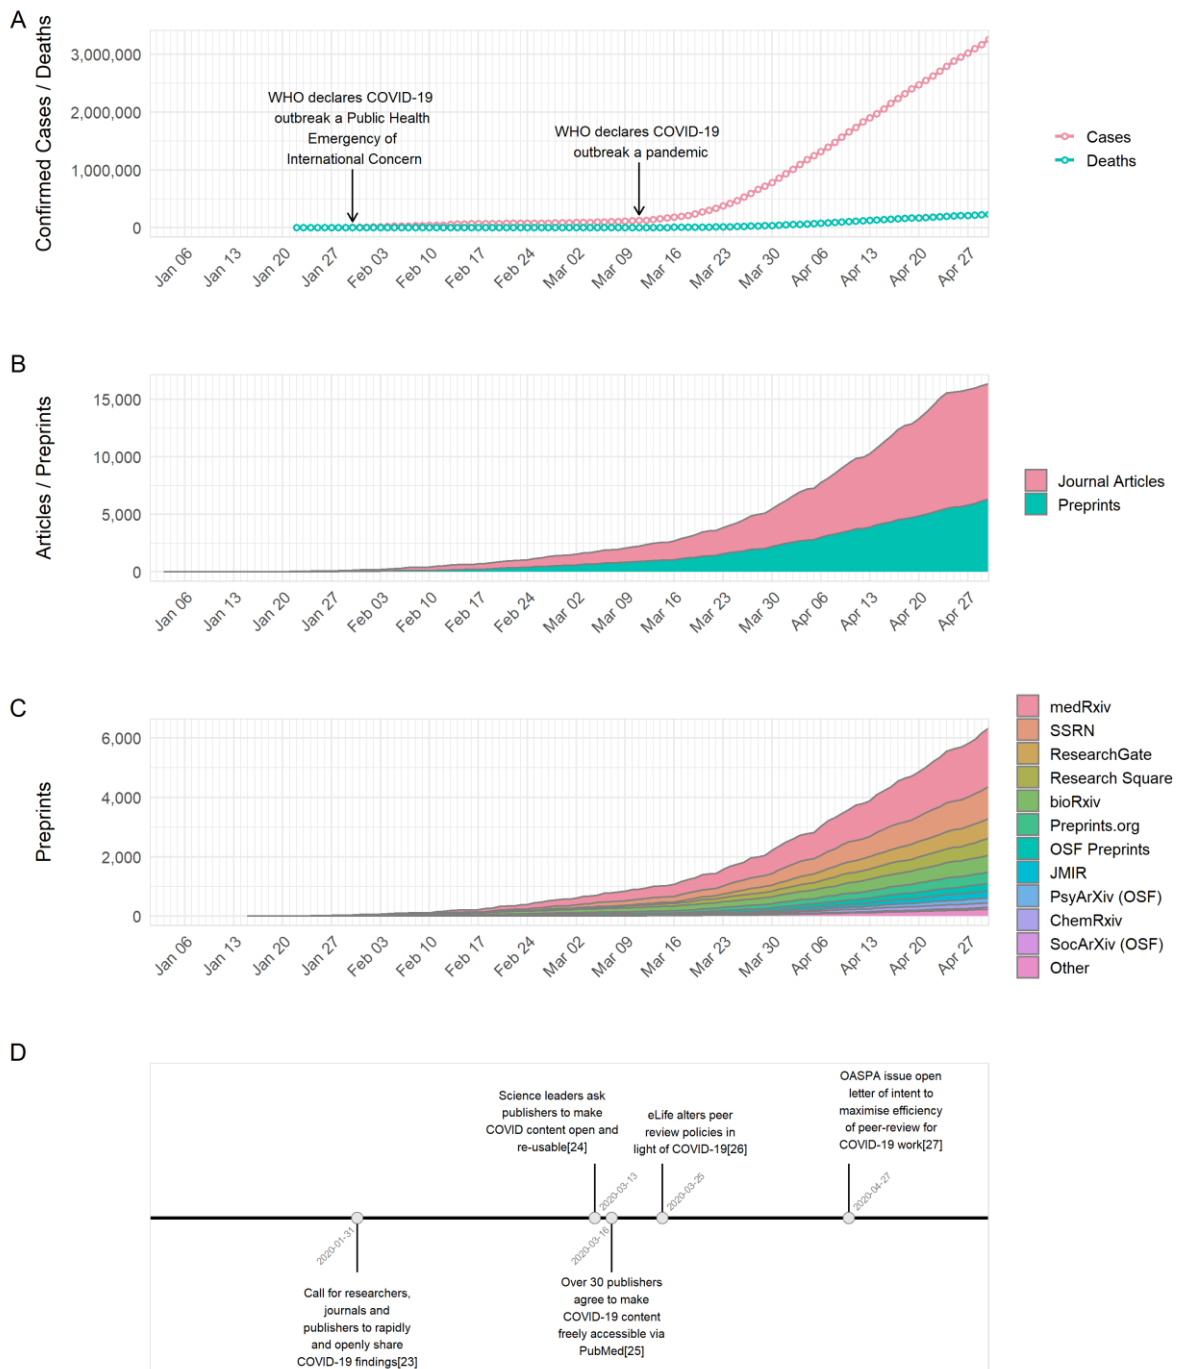

843

844 **Figure 1. Development of COVID-19 and publication response between January 2020 and April 2020.**

845 (A) Number of COVID-19 confirmed cases and reported deaths. Data is sourced from  
 846 <https://github.com/datasets/covid-19/>, based on case and death data aggregated by the Johns  
 847 Hopkins University Center for Systems Science and Engineering (<https://systems.jhu.edu/>). (B)  
 848 Cumulative growth of journal articles and preprints containing COVID-19 related search terms. (C)  
 849 Cumulative growth of preprints containing COVID-19 related search terms, broken down by individual  
 850 preprint server. (D) Timeline representing significant changes made by traditional publishers as they  
 851 adopt journal policies relating to COVID-19 research. Journal data in (B) is based upon data extracted  
 852 from Dimensions (<https://www.dimensions.ai>), preprint data in (B) and (C) is based upon data  
 853 gathered by Fraser and Kramer (2020; <https://doi.org/10.6084/m9.figshare.12033672>).

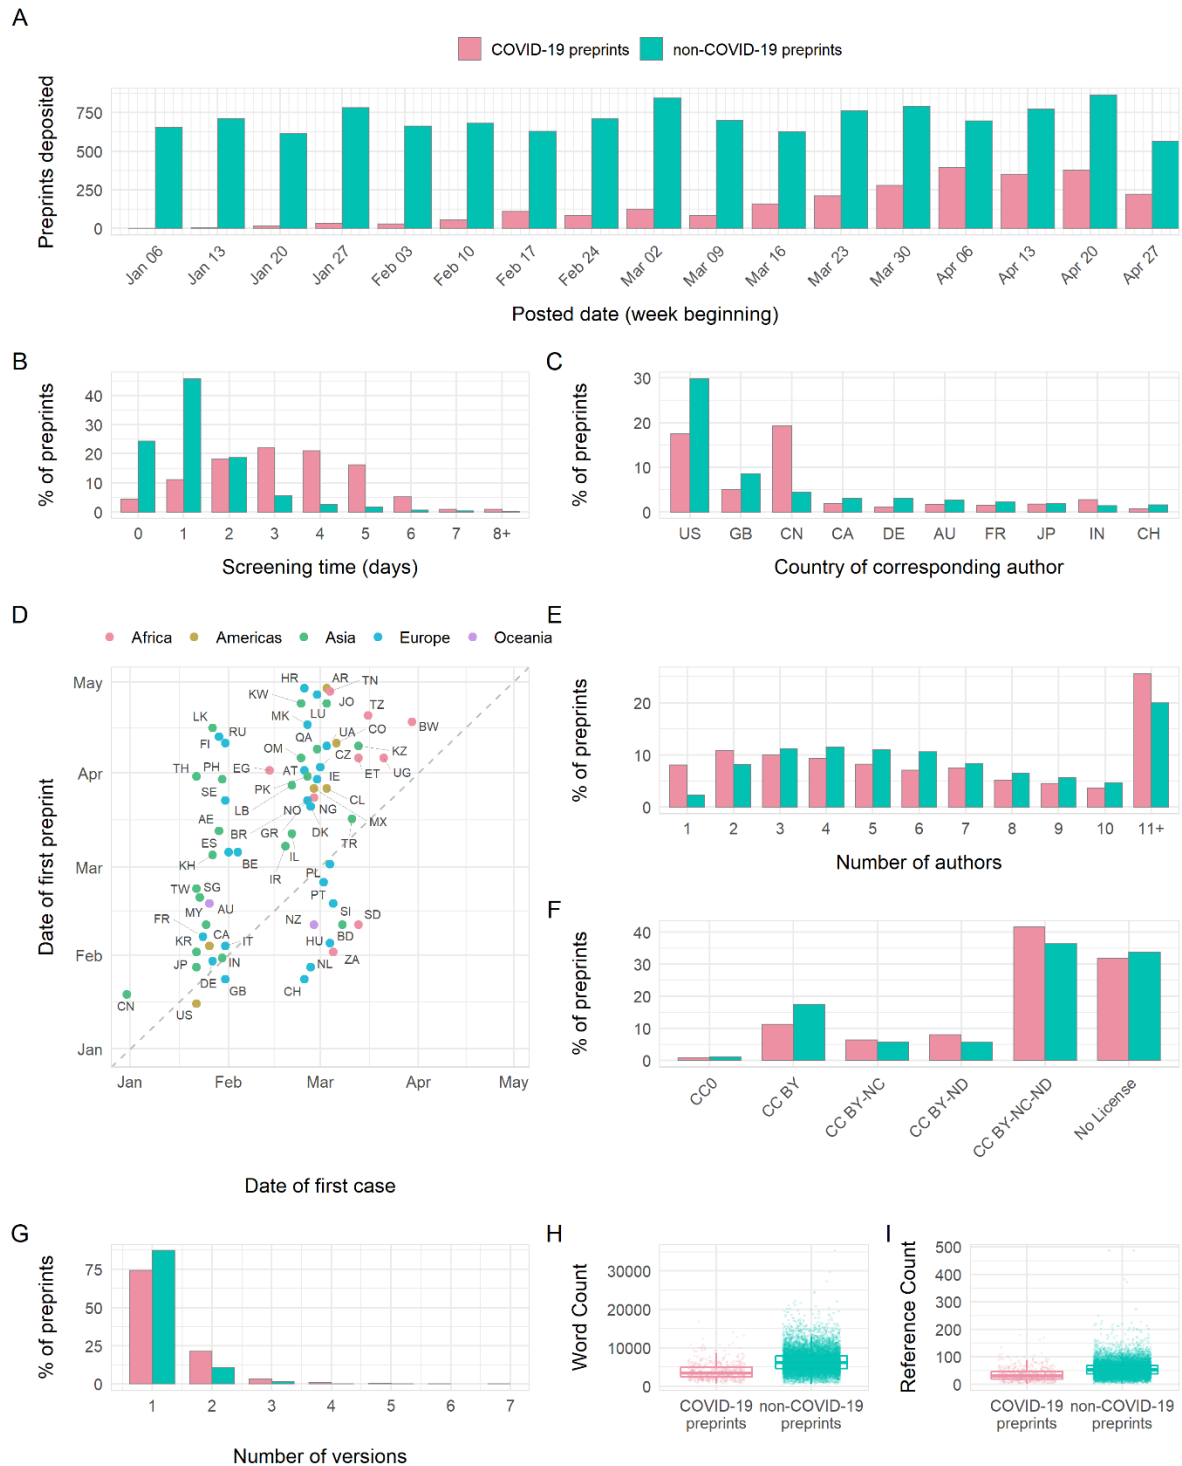

854

855 **Figure 2. Attributes of COVID-19 and non-COVID-19 preprints deposited on bioRxiv and medRxiv**  
 856 **between January and April 2020.** (A) Number of preprints deposited per week. (B) Screening time  
 857 for bioRxiv and medRxiv. (C) Percentage of preprints deposited by country of corresponding author.  
 858 (D) Correlation between date of the first preprint originating from a country (according to the  
 859 affiliation of the corresponding author) and the date of the first confirmed case from the same  
 860 country for COVID-19 preprints. (E) Distribution of the number of authors per preprint. (F)  
 861 Distribution of preprint licence chosen by the author. (G) Distribution of the number of deposited  
 862 preprint versions. (H) Word counts per preprints. (I) Reference counts per preprint. Data for (H) and

863 (I) were from bioRxiv only. Boxplot horizontal lines denote lower quartile, median, upper quartile,  
864 with whiskers extending to  $1.5 \times \text{IQR}$ . All boxplots additionally show raw data values for individual  
865 preprints with added horizontal jitter for visibility.



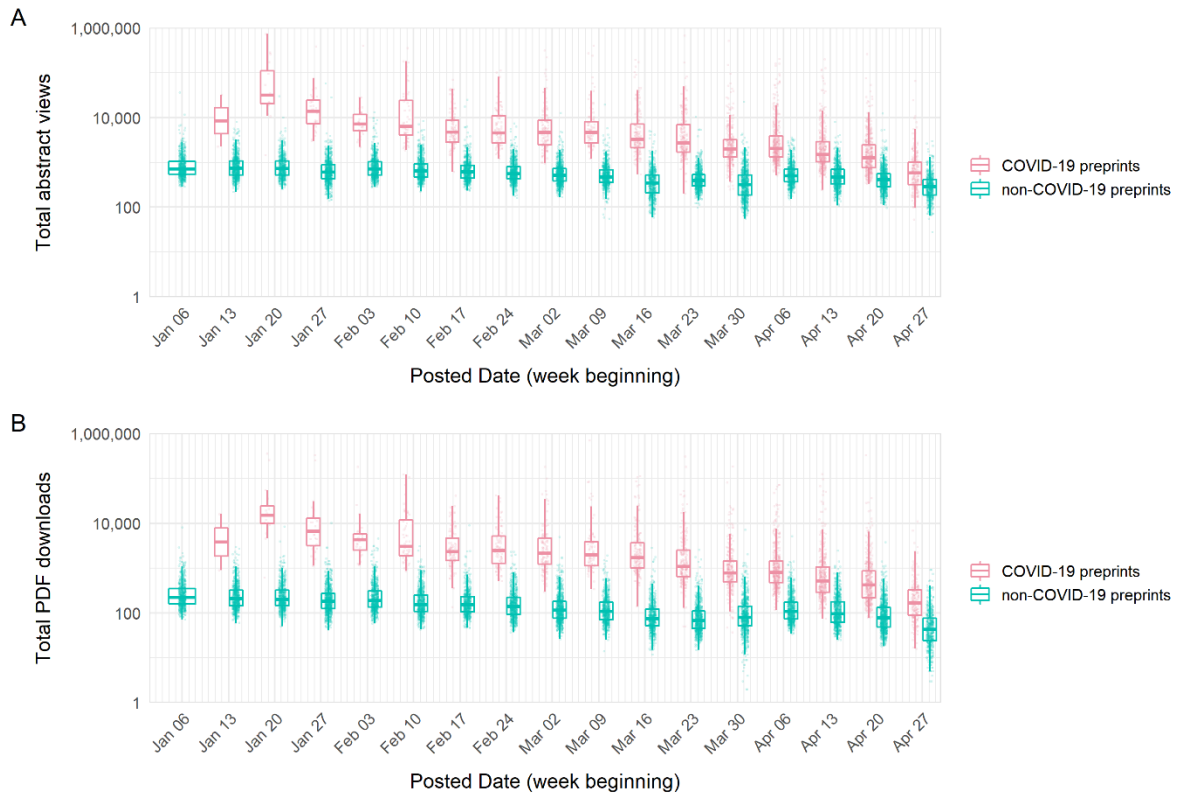

866

**Figure 3. Distribution of access statistics for COVID-19 and non-COVID-19 preprints posted on bioRxiv and medRxiv. (A) Total abstract views. (B) Total PDF downloads.**

867

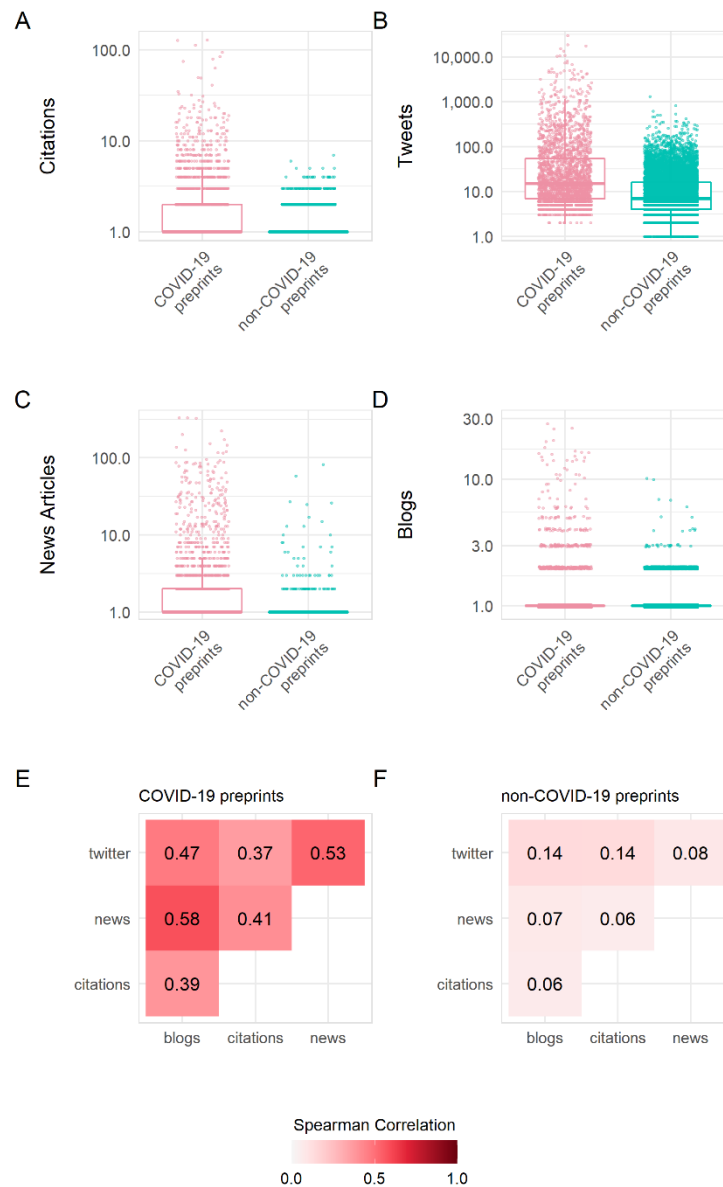

868

869 **Figure 4. Comparison of citations, tweets, mentions in news articles and blogs for COVID-19 and**  
 870 **non-COVID-19 preprints posted on bioRxiv and medRxiv between January and April 2020. (A)**  
 871 **Citations per preprint. (B) Tweets per preprint. (C) News article mentions per preprint. (D)**  
 872 **Blog mentions per preprint. (E) Spearman's correlation matrix between all indicators for COVID-19**  
 873 **preprints. (F) Spearman's correlation matrix between all indicators for non-COVID-19 preprints. (A-D)**  
 874 **as log scale, with +1 added for visualisation. Boxplot horizontal lines denote lower quartile, median,**  
 875 **upper quartile, with whiskers extending to 1.5\*IQR. All boxplots additionally show raw data values for**  
 876 **individual preprints with added horizontal jitter for visibility.**

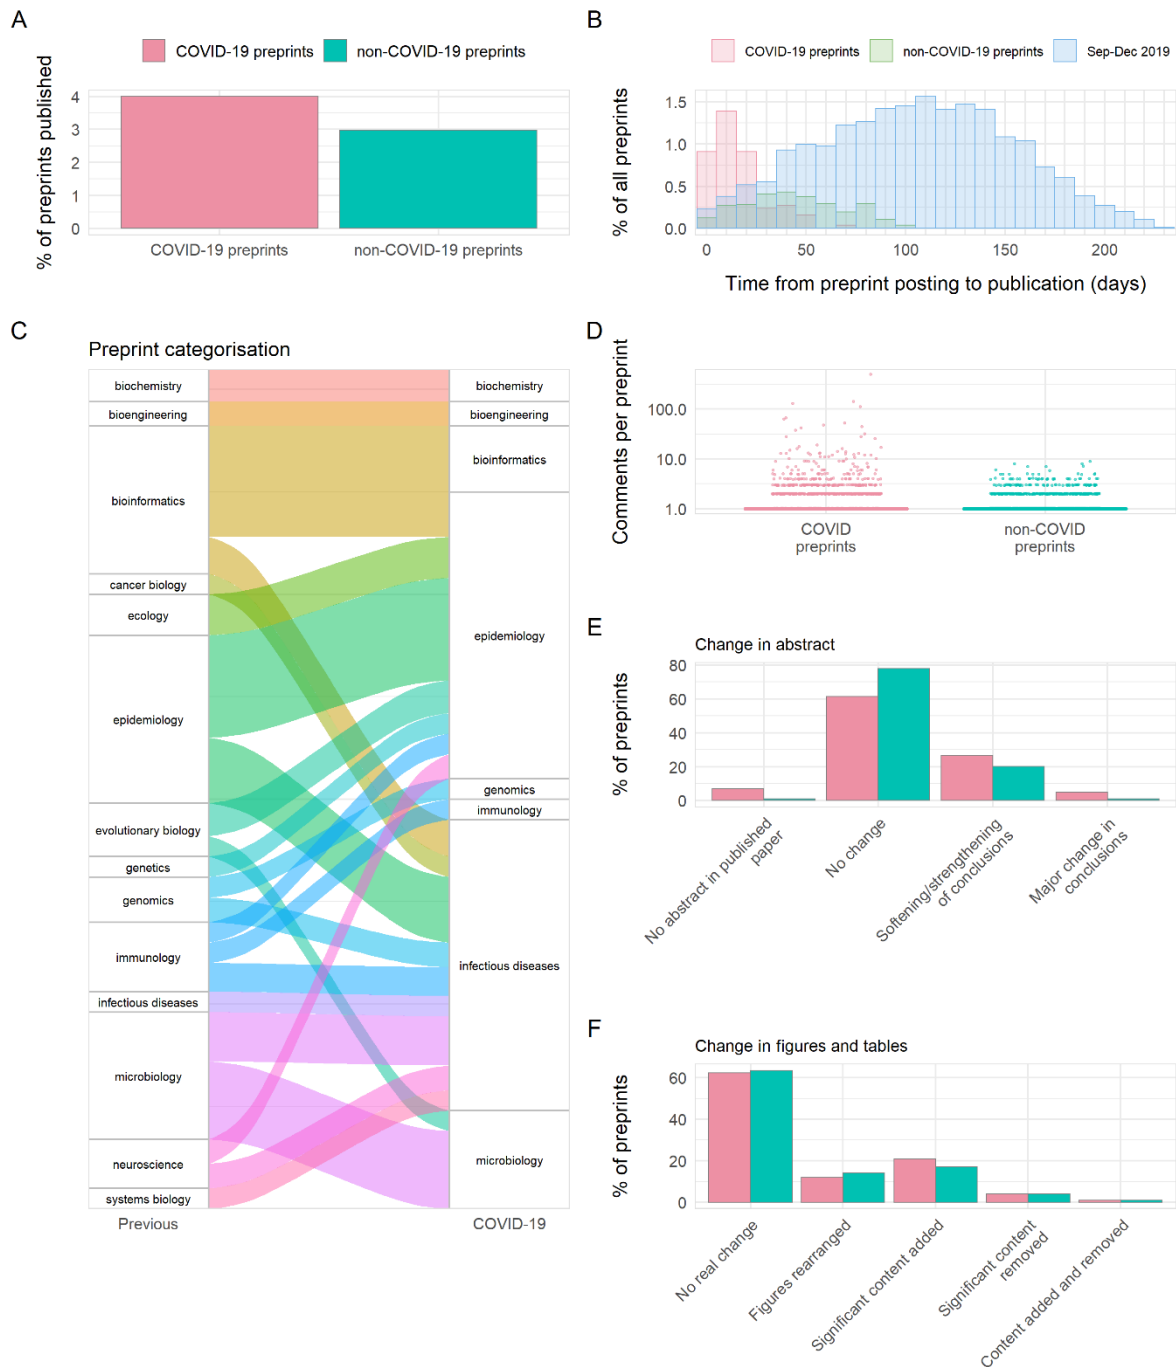

877

878 **Figure 5. Publishing and peer-review of COVID-19 preprints.** (A) percentage of COVID-19 and non-  
 879 COVID-19 preprints published between Jan-April. (B) Time taken from depositing a preprint on bioRxiv  
 880 or medRxiv and subsequent publication for COVID-19 preprints (red), non-COVID-19 preprints posted  
 881 between January - April 2020 (green) and non-COVID-19 preprints posted between September –  
 882 December 2019 (blue). (C) Change in preprint category for COVID-19 preprint authors compared to  
 883 their previous preprint (COVID-19 or non-COVID-19), for combinations with  $n \geq 5$  authors. (D)  
 884 Numbers of comments for COVID-19 preprints and non-COVID-19 preprints, log scale. (E) Abstract  
 885 changes between version 1 of a preprint and the associated published paper. (F) Qualitative overall  
 886 changes (Information within main text figures and tables) between version 1 of a preprint and the  
 887 associated published paper.

888

**Table 1. Top 10 cited COVID-19 preprints**

| Rank | Source  | doi                         | Title                                                                                                                                        | Posted date | Citations |
|------|---------|-----------------------------|----------------------------------------------------------------------------------------------------------------------------------------------|-------------|-----------|
| 1    | biorxiv | 10.1101/2020.02.07.937862   | Severe acute respiratory syndrome-related coronavirus - The species and its viruses, a statement of the Coronavirus Study Group              | 11/02/2020  | 127       |
| 2    | medrxiv | 10.1101/2020.02.06.20020974 | Clinical characteristics of 2019 novel coronavirus infection in China                                                                        | 09/02/2020  | 126       |
| 3    | medrxiv | 10.1101/2020.01.23.20018549 | Novel coronavirus 2019-nCoV: early estimation of epidemiological parameters and epidemic predictions                                         | 24/01/2020  | 112       |
| 4    | biorxiv | 10.1101/2020.01.22.914952   | Discovery of a novel coronavirus associated with the recent pneumonia outbreak in humans and its potential bat origin                        | 23/01/2020  | 93        |
| 5    | biorxiv | 10.1101/2020.01.26.919985   | Single-cell RNA expression profiling of ACE2, the putative receptor of Wuhan 2019-nCoV                                                       | 26/01/2020  | 83        |
| 6    | biorxiv | 10.1101/2020.01.31.929042   | The novel coronavirus 2019 (2019-nCoV) uses the SARS-coronavirus receptor ACE2 and the cellular protease TMPRSS2 for entry into target cells | 31/01/2020  | 79        |
| 7    | biorxiv | 10.1101/2020.01.30.927806   | The digestive system is a potential route of 2019-nCoV infection: a bioinformatics analysis based on single-cell transcriptomes              | 31/01/2020  | 74        |
| 8    | medrxiv | 10.1101/2020.02.10.20021675 | Epidemiological and clinical features of the 2019 novel coronavirus outbreak in China                                                        | 11/02/2020  | 62        |
| 9    | biorxiv | 10.1101/2020.02.03.931766   | Specific ACE2 Expression in Cholangiocytes May Cause Liver Damage After 2019-nCoV Infection                                                  | 04/02/2020  | 49        |
| 10   | medrxiv | 10.1101/2020.03.03.20028423 | Epidemiology and Transmission of COVID-19 in Shenzhen China: Analysis of 391 cases and 1,286 of their close contacts                         | 04/03/2020  | 48        |

**Table 2. Top 10 tweeted COVID-19 preprints**

| Rank | Source  | doi                         | Title                                                                                                                           | Posted date | Tweets | News articles | Blogs |
|------|---------|-----------------------------|---------------------------------------------------------------------------------------------------------------------------------|-------------|--------|---------------|-------|
| 1    | medrxiv | 10.1101/2020.04.14.20062463 | COVID-19 Antibody Seroprevalence in Santa Clara County, California                                                              | 17/04/2020  | 29984  | 328           | 24    |
| 2    | biorxiv | 10.1101/2020.01.30.927871   | Uncanny similarity of unique inserts in the 2019-nCoV spike protein to HIV-1 gp120 and Gag                                      | 31/01/2020  | 18587  | 92            | 17    |
| 3    | medrxiv | 10.1101/2020.04.04.20053058 | Indoor transmission of SARS-CoV-2                                                                                               | 07/04/2020  | 17494  | 67            | 9     |
| 4    | medrxiv | 10.1101/2020.03.22.20040758 | Efficacy of hydroxychloroquine in patients with COVID-19: results of a randomized clinical trial                                | 30/03/2020  | 15337  | 117           | 15    |
| 5    | medrxiv | 10.1101/2020.03.09.20033217 | Aerosol and surface stability of HCoV-19 (SARS-CoV-2) compared to SARS-CoV-1                                                    | 10/03/2020  | 13407  | 333           | 27    |
| 6    | biorxiv | 10.1101/2020.03.13.990226   | Reinfection could not occur in SARS-CoV-2 infected rhesus macaques                                                              | 14/03/2020  | 10870  | 225           | 19    |
| 7    | medrxiv | 10.1101/2020.04.16.20065920 | Outcomes of hydroxychloroquine usage in United States veterans hospitalized with Covid-19                                       | 21/04/2020  | 10512  | 329           | 15    |
| 8    | medrxiv | 10.1101/2020.03.30.20048165 | Association of BCG vaccination policy with prevalence and mortality of COVID-19                                                 | 06/04/2020  | 10435  | 3             | 0     |
| 9    | medrxiv | 10.1101/2020.03.17.20037713 | A serological assay to detect SARS-CoV-2 seroconversion in humans                                                               | 18/03/2020  | 8094   | 153           | 13    |
| 10   | medrxiv | 10.1101/2020.03.24.20042937 | Correlation between universal BCG vaccination policy and reduced morbidity and mortality for COVID-19: an epidemiological study | 28/03/2020  | 7427   | 77            | 5     |

**Table 3. Top 10 COVID-19 preprints covered by news organisations**

| Rank | Source  | doi                         | Title                                                                                                                                                                                                                                                                                             | Posted date | Tweets | News articles | Blogs |
|------|---------|-----------------------------|---------------------------------------------------------------------------------------------------------------------------------------------------------------------------------------------------------------------------------------------------------------------------------------------------|-------------|--------|---------------|-------|
| 1    | medrxiv | 10.1101/2020.03.09.20033217 | Aerosol and surface stability of HCoV-19 (SARS-CoV-2) compared to SARS-CoV-1                                                                                                                                                                                                                      | 10/03/2020  | 13407  | 333           | 27    |
| 2    | medrxiv | 10.1101/2020.04.16.20065920 | Outcomes of hydroxychloroquine usage in United States veterans hospitalized with Covid-19                                                                                                                                                                                                         | 21/04/2020  | 10512  | 329           | 15    |
| 3    | medrxiv | 10.1101/2020.04.14.20062463 | COVID-19 Antibody Seroprevalence in Santa Clara County, California                                                                                                                                                                                                                                | 17/04/2020  | 29984  | 328           | 24    |
| 4    | biorxiv | 10.1101/2020.03.13.990226   | Reinfection could not occur in SARS-CoV-2 infected rhesus macaques                                                                                                                                                                                                                                | 14/03/2020  | 10870  | 225           | 19    |
| 5    | biorxiv | 10.1101/2020.03.30.015347   | Susceptibility of ferrets, cats, dogs, and different domestic animals to SARS-coronavirus-2                                                                                                                                                                                                       | 31/03/2020  | 4399   | 201           | 24    |
| 6    | medrxiv | 10.1101/2020.03.23.20039446 | Transmission Potential of SARS-CoV-2 in Viral Shedding Observed at the University of Nebraska Medical Center                                                                                                                                                                                      | 26/03/2020  | 4460   | 172           | 13    |
| 7    | medrxiv | 10.1101/2020.03.17.20037713 | A serological assay to detect SARS-CoV-2 seroconversion in humans                                                                                                                                                                                                                                 | 18/03/2020  | 8094   | 153           | 13    |
| 8    | medrxiv | 10.1101/2020.04.07.20056424 | Chloroquine diphosphate in two different dosages as adjunctive therapy of hospitalized patients with severe respiratory syndrome in the context of coronavirus (SARS-CoV-2) infection: Preliminary safety results of a randomized, double-blinded, phase IIb clinical trial (CloroCovid-19 Study) | 11/04/2020  | 4503   | 146           | 15    |
| 9    | biorxiv | 10.1101/2020.03.08.982637   | Aerodynamic Characteristics and RNA Concentration of SARS-CoV-2 Aerosol in Wuhan Hospitals during COVID-19 Outbreak                                                                                                                                                                               | 10/03/2020  | 972    | 138           | 12    |
| 10   | medrxiv | 10.1101/2020.03.11.20031096 | Relationship between the ABO Blood Group and the COVID-19 Susceptibility                                                                                                                                                                                                                          | 16/03/2020  | 3963   | 127           | 13    |

**Table 4. Top 10 commented on COVID-19 preprints**

| Rank | source  | doi                         | title                                                                                                                                                           | posted date | comments count |
|------|---------|-----------------------------|-----------------------------------------------------------------------------------------------------------------------------------------------------------------|-------------|----------------|
| 1    | medrxiv | 10.1101/2020.04.14.20062463 | COVID-19 Antibody Seroprevalence in Santa Clara County, California                                                                                              | 17/04/2020  | 508            |
| 2    | medrxiv | 10.1101/2020.03.24.20042937 | Correlation between universal BCG vaccination policy and reduced morbidity and mortality for COVID-19: an epidemiological study                                 | 28/03/2020  | 141            |
| 3    | biorxiv | 10.1101/2020.01.30.927871   | Uncanny similarity of unique inserts in the 2019-nCoV spike protein to HIV-1 gp120 and Gag                                                                      | 31/01/2020  | 127            |
| 4    | medrxiv | 10.1101/2020.04.16.20065920 | Outcomes of hydroxychloroquine usage in United States veterans hospitalized with Covid-19                                                                       | 21/04/2020  | 114            |
| 5    | medrxiv | 10.1101/2020.03.11.20031096 | Relationship between the ABO Blood Group and the COVID-19 Susceptibility                                                                                        | 16/03/2020  | 66             |
| 6    | medrxiv | 10.1101/2020.03.27.20043752 | Forecasting COVID-19 impact on hospital bed-days, ICU-days, ventilator-days and deaths by US state in the next 4 months                                         | 30/03/2020  | 61             |
| 7    | medrxiv | 10.1101/2020.03.22.20040758 | Efficacy of hydroxychloroquine in patients with COVID-19: results of a randomized clinical trial                                                                | 30/03/2020  | 53             |
| 8    | medrxiv | 10.1101/2020.04.05.20054361 | Population-level COVID-19 mortality risk for non-elderly individuals overall and for non-elderly individuals without underlying diseases in pandemic epicenters | 08/04/2020  | 47             |
| 9    | biorxiv | 10.1101/2020.01.26.919985   | Single-cell RNA expression profiling of ACE2, the putative receptor of Wuhan 2019-nCov                                                                          | 26/01/2020  | 44             |
| 10   | medrxiv | 10.1101/2020.03.09.20033217 | Aerosol and surface stability of HCoV-19 (SARS-CoV-2) compared to SARS-CoV-1                                                                                    | 10/03/2020  | 41             |
